# Supplementary material for: Technology-enabled examinations of cardiac rhythm, optic nerve, oral health, tympanic membrane, gait and coordination evaluated jointly with routine health screenings: an observational study at the 2015 Kumbh Mela in India
Source: PubMed Central journal article supplement — BMJ Open. 2018 Apr 20;8(4):e018774. doi: 10.1136/bmjopen-2017-018774 (PMC5914894; doi:10.1136/bmjopen-2017-018774), 2018-04-20
Supplement: bmjopen-2017-018774.draft_revisions.pdf [file bmjopen-2017-018774.draft_revisions.pdf]

# BMJ Open

BMJ Open is committed to open peer review. As part of this commitment we make the peer review history of every article we publish publicly available.

When an article is published we post the peer reviewers' comments and the authors' responses online. We also post the versions of the paper that were used during peer review. These are the versions that the peer review comments apply to.

The versions of the paper that follow are the versions that were submitted during the peer review process. They are not the versions of record or the final published versions. They should not be cited or distributed as the published version of this manuscript.

BMJ Open is an open access journal and the full, final, typeset and author-corrected version of record of the manuscript is available on our site with no access controls, subscription charges or pay-per-view fees (<http://bmjopen.bmj.com>).

If you have any questions on BMJ Open's open peer review process please email [info.bmjopen@bmj.com](mailto:info.bmjopen@bmj.com)

# BMJ Open

## Technology-Enabled Non-Invasive Examinations Augment Primary Care

|                                 |                                                                                                                                                                                                                                                                                                                                                                                                                                                                                                                                                                                                         |
|---------------------------------|---------------------------------------------------------------------------------------------------------------------------------------------------------------------------------------------------------------------------------------------------------------------------------------------------------------------------------------------------------------------------------------------------------------------------------------------------------------------------------------------------------------------------------------------------------------------------------------------------------|
| Journal:                        | <i>BMJ Open</i>                                                                                                                                                                                                                                                                                                                                                                                                                                                                                                                                                                                         |
| Manuscript ID                   | bmjopen-2017-018774                                                                                                                                                                                                                                                                                                                                                                                                                                                                                                                                                                                     |
| Article Type:                   | Research                                                                                                                                                                                                                                                                                                                                                                                                                                                                                                                                                                                                |
| Date Submitted by the Author:   | 24-Jul-2017                                                                                                                                                                                                                                                                                                                                                                                                                                                                                                                                                                                             |
| Complete List of Authors:       | Shah, Pratik; Massachusetts Institute of Technology, Media Lab<br>Yauney, Gregory; Massachusetts Institute of Technology, Media Arts and Sciences<br>Gupta, Otkrist; Massachusetts Institute of Technology, Media Arts and Sciences<br>Patalano, Vincent; Harvard Medical School, Ophthalmology; Cambridge Health Alliance<br>Mohit, Mrinal; Massachusetts Institute of Technology, Media Arts and Sciences<br>Merchant, Rikin; Karmaveer Bhausahab Hiray Dental College and Hospital, Global Health<br>Subramanian, S V; Harvard School of Public Health, Department of Society, Human Development and |
| <b>Primary Subject Heading</b>: | Diagnostics                                                                                                                                                                                                                                                                                                                                                                                                                                                                                                                                                                                             |
| Secondary Subject Heading:      | Diagnostics, Global health                                                                                                                                                                                                                                                                                                                                                                                                                                                                                                                                                                              |
| Keywords:                       | PRIMARY CARE, Glaucoma < OPHTHALMOLOGY, Telemedicine < BIOTECHNOLOGY & BIOINFORMATICS                                                                                                                                                                                                                                                                                                                                                                                                                                                                                                                   |
|                                 |                                                                                                                                                                                                                                                                                                                                                                                                                                                                                                                                                                                                         |

SCHOLARONE™  
Manuscripts

1  
2 1 **Technology-Enabled Non-Invasive Examinations Augment Primary Care: An Observational Study**

3  
4 2  
5 3 Pratik Shah<sup>1\*</sup> Ph.D., Gregory Yauney<sup>1\*</sup>, Otkrist Gupta<sup>1</sup>, Vincent Patalano II<sup>2,3</sup> M.D., Mrinal Mohit<sup>1</sup>, Rikin  
6 4 Merchant<sup>4</sup> BDS, S. V. Subramanian<sup>5</sup> Ph.D.  
7  
8  
9 5  
10

11 6 <sup>1</sup> Massachusetts Institute of Technology, Cambridge, Massachusetts, United States of America

12  
13 7 <sup>2</sup> Cambridge Health Alliance, Department of Ophthalmology, Cambridge, Massachusetts, United States of  
14 8 America

15 9 <sup>3</sup> Harvard Medical School, Department of Ophthalmology, Boston, Massachusetts, United States of America

16 10 <sup>4</sup> Karmaveer Bhausheb Hiray Dental College and Hospital, Department of Prosthodontics, Nashik, India

17 11 <sup>5</sup> Harvard T.H. Chan School of Public Health, Department of Social and Behavioral Sciences, Boston,  
18 12 Massachusetts, United States of America  
19  
20  
21

22 13  
23 14  
24 15 <sup>†</sup> Corresponding author

25 16 E-mail: pratiks@mit.edu

26  
27 17 \*These authors contributed equally to this work.  
28  
29  
30  
31  
32  
33  
34 20  
35  
36  
37  
38  
39  
40  
41  
42  
43  
44  
45  
46  
47  
48  
49  
50  
51  
52  
53  
54  
55  
56  
57  
58  
59  
60

1  
2 21 ABSTRACT

3  
4 22 **Objectives:** Significance and efficacy of advanced technology-enabled non-invasive diagnostic screening (TES)  
5  
6 23 using smartphones and other point-of-care medical devices vs. conventional vital sign examinations is  
7  
8 24 unevaluated for primary care screening of patients.

9 25 **Design, Settings and Participants:** Dental conditions, cardiac ECG arrhythmias, tympanic membrane disorders,  
10  
11 26 blood oxygenation levels, optic nerve disorders, and neurological fitness of 455 consenting 18 to 90 years adults  
12  
13 27 were evaluated using FDA approved advanced smartphone powered technologies with vital signs at a primary  
14  
15 28 care center during the 2015 Kumbh Mela in India. A novel remote web platform was developed to allow expert  
16  
17 29 physicians to examine TES data and compare efficacy with conventional vital sign screening methods.

18  
19 30 **Main outcome measures and Results:** TES and vital sign screenings identified unique clinical conditions in  
20  
21 31 distinct patients. Intraoral fluorescent imaging classified 63% of the population with dental caries and periodontal  
22  
23 32 diseases. An association between poor oral health and cardiovascular illnesses was also identified. Tympanic  
24  
25 33 membrane imaging detected eardrum abnormalities in 13% of the population, several with self-reported hearing  
26  
27 34 difficulties. Gait and coordination issues were discovered in eight subjects and one subject had arrhythmia. Cross-  
28  
29 35 correlations were observed between low oxygen saturation and low BMI with smokers ( $p = 0.0087$  and  $p = 0.0122$ ,  
30  
31 36 respectively), and association of high BMI with elevated blood pressure in middle-aged subjects were found.

32 37 **Interpretation:** TES synergistically identified clinically significant abnormalities in several subjects who otherwise  
33  
34 38 presented normal vital sign measurements. Physicians validated TES findings and utilized vital sign data and  
35  
36 39 medical history responses for comprehensive diagnoses for at-risk patients. TES identified high prevalence of oral  
37  
38 40 diseases, hypertension, obesity and ophthalmic conditions among the middle-aged and elderly Indian population,  
39  
40 41 calling for public health interventions.

41  
42 42  
43  
44 43 **Ethics approval:** MGVBHDC/15-16/571 protocol was approved for clinical work, and the data was transferred  
45  
46 44 and analyzed according to MIT COUHES protocol 1512338971  
47  
48 45  
49  
50  
51  
52  
53  
54  
55  
56  
57  
58  
59  
60



1  
2 46 **What is already known about this subject:** We searched PubMed for studies involving either the proposal or  
3  
4 47 evaluation of imaging technologies for diagnosing medical conditions, with a focus on literature from the past  
5  
6 48 twenty years. Many studies have proposed or evaluated individual types of TES in isolation with relatively few  
7  
8 49 subjects. However there is a lack of comparison to traditional and established vital sign measurements that are  
9  
10 50 commonly deployed in healthcare screenings to determine the effectiveness of TES approaches as a whole.

11 51 **What are the new findings:** This study is the first to combine multiple types of TES and to compare their results  
12  
13 52 to more traditional diagnostic methods. We show a distinct difference in diagnoses of patients using traditional  
14  
15 53 vital signs monitoring and TES, indicating a synergistic role for TES when used for primary health screening.

16  
17 54 **Impact on clinical practice:** Detailed TES imaging and diagnostic approaches outlined by us will allow for  
18  
19 55 increased and earlier monitoring of previously undiagnosed conditions, leading to increased quality of care for  
20  
21 56 patients. In addition to finding high prevalence of obesity, oral conditions, and elevated blood pressure, we  
22  
23 57 foresee two improvements in public health outcomes from our study. Historically marginalized individuals in  
24  
25 58 resource-limited settings can be identified and included to the primary care continuum.

## INTRODUCTION

Providing good healthcare in low and middle-income countries (LMIC) paradoxically requires expensive equipment for health monitoring and assessment which may not be easily available because of resource-limitations[1]. Cardiovascular diseases, preventable blindness, oral cancer and treatable neurological conditions constitute more than 50% of the disease burden in LMIC and result in significantly morbidity and mortality[2, 3]. India, with a population in excess of 1.2 billion individuals, is one of the largest countries in the world[4]. India has significant disparity in access to basic healthcare and diagnostic screenings due to its geographically fragmented medical infrastructure[5]. Consequently, significant portions of the population may exist either as undiagnosed, diagnosed but unaware or misdiagnosed for several high-risk diseases at the primary care level.

Inexpensive device-based imaging and first-level analysis (e.g., smartphones capable of pulse oximetry, blood pressure, ECG recording and analysis or image segmentation) either operated by human experts, by operators with basic training using algorithms or clinical decision support systems are examples of affordable and potentially scalable technology-enabled screening[6, 7]. Previous reports from our group have demonstrated the utility of smartphones, modular devices and imaging technologies for sleep apnea[8] and refractometry screenings[9], at-home monitoring of diabetic retinopathy[10] and detecting melanomas[11]. Using smartphones with low-cost adapters, other researchers have also performed oral and cervical cancer[12], diabetic retinopathy [13], and malaria[14] assessments. Mobile smartphones equipped with imaging adapters, high-resolution cameras, light emitting diodes, fast processors and lightweight apps can thus be used for targeted diagnostic screenings at modest expense[15, 16].

Clinical studies measuring the effectiveness of technology-enabled screening (TES) methods in identifying at-risk and sick patients are, however, limited[17]. The majority of previous studies using newer TES approaches have been performed in silos concentrating on individual devices or specific anatomical sites, often precluding more comprehensive assessment of patient health[18-24]. Interpretation of TES data has also been limited by risk of bias, differences between study groups and lack of comparison to traditional and established vital sign measurements that are otherwise commonly deployed in primary care screenings. Due to these reasons, a lack of consensus exists about the usefulness of TES in augmenting vital-sign-monitoring-based primary health screenings in LMIC. Therefore, there is a pressing need for cost-effective, reliable screening protocols and deployable technologies to empower LMIC medical professionals and healthcare providers to identify patients and add them to the continuum of care.

1  
2 88 The 2015 Kumbh Mela mass gathering[25] presented a unique opportunity for deployment and side-by-  
3  
4 89 side evaluation of TES and traditional vital sign examinations. Multiple TES devices and methods and a remote  
5  
6 90 clinical examination system to facilitate examination of findings were utilized to evaluate their collective use for  
7  
8 91 comprehensive diagnoses of consenting adults. This study assesses whether low-cost, portable and non-invasive  
9  
10 92 examinations using TES can augment conventional vital-sign-centered physiological measurements by detecting  
11  
12 93 additional anatomical, structural or biomarker-driven disease pathologies. We report that TES for dental, optic  
13  
14 94 nerve, tympanic membrane, cardiac rhythm and neurologic abnormalities identified several subjects scored as  
15  
16 95 normal by vital sign assessments. We therefore conclude that TES synergistically augments standard vital sign  
17  
18 96 examinations, and is a promising approach for providing comprehensive and timely care to at-risk and sick  
19  
20 97 individuals using the methods described in this manuscript.  
21  
22  
23  
24  
25  
26  
27  
28  
29  
30  
31  
32  
33  
34  
35  
36  
37  
38  
39  
40  
41  
42  
43  
44  
45  
46  
47  
48  
49  
50  
51  
52  
53  
54  
55  
56  
57  
58  
59  
60

## METHODS

**Study design:** 494 consenting adults between the ages of 18 and 90 years were screened by multiple tests in the order outlined in **Fig 1** at the Mahatma Gandhi Vidyamandir Karmaveer Bhausaheb Hiray Dental College & Hospital (MGVKBHDC) in Nashik, India, during the 2015 Sinhast Kumbh Mela (14 July-25 September). MGVKBHDC/15-16/571 protocol was approved for clinical work, and the data was transferred and analyzed according to MIT COUHES protocol 1512338971. **Table 1** shows the number of subjects who completed each test. Inclusion criteria, ethical consideration, and consent procedure are described in the supplementary appendix.

**Medical history and vital sign measurements:** Subjects self-reported to a detailed computerized questionnaire that included geographic, demographic as well as questions about past medical history and current illnesses. Height, weight, systolic and diastolic blood pressure, resting heart rate, and temperature were also measured.

**Technology-enabled screening:** FDA-approved devices were used to image patients, CellScope Oto (CellScope Inc. USA) for the tympanic membrane, D-EYE Direct Ophthalmoscopy Adapter (D-EYE Srl, USA) for the optic nerve head, and SOPROCARE (SOPRO Acteon Imaging, France) for dental health. Microsoft Kinect (Microsoft Corporation, USA) was used to record subjects performing gait and coordination tests. AliveCor Mobile ECG (AliveCor Inc, USA) was used to capture and analyze a 30-second rhythm strip. A CMS 50-DL Pulse Oximeter (Contec Medical Systems, USA) was used to measure blood oxygen saturation levels of hemoglobin. All devices have been previously described elsewhere [20-22, 25]. The supplementary appendix details specific procedures for each device.

**Data analyses:** Expert physicians conducted diagnostic feature annotation of de-identified images and videos collected by TES via a web-based examination portal. This password-protected secure interface displayed an image or video for one patient at a time for a given examination. Physicians were able to mark specific features in the videos by drawing boxes around them that paused that specific frame, assign an overall score of 1 (best) to 5 (worst) for the entire video, and to write clinical features that were present for specific frames or the entire video (**Supplementary Fig 2**). A panel of at least three physicians for each type of examination was assembled who remotely and independently annotated the data facilitated by the web interface. The majority ratings for each subject were then calculated for all TES tests. For subjects with no majority rating, the lesser of the tied ratings was chosen to not overstate the prevalence of diagnosed illnesses. Results from each test were analyzed for cross-correlations with self-reported medical history responses, age and sex.

## RESULTS

**Medical history and vital signs:** Self-reported medical history responses are shown in **Supplementary Tables**

**2, 3, and 4.** Results of vital sign measurements are shown in **Table 1** with obesity (40%) and elevated blood

pressure (19%) identified as most prevalent among the screened population. In comparing our data to the latest

release of the National Family and Health Survey, we detected higher prevalence of high BMI and elevated blood

pressure for both females and males but a similar prevalence of low BMI (**Supplementary Table 6**) [26].

**Population demographic analysis:** It took an average of approximately 35 minutes for each patient to complete

the medical questionnaire, vital sign measurements and TES screening. Subjects unable to stay for the entire

duration could exit the study at their convenience. There were more male than female participants which is likely

at least in part the consequence of the fact that there are generally more male pilgrims at outdoor Indian religious

festivals, including the Kumbh Mela. The gender breakdown for nearly all tests was 60% males and 40% females,

though gait analysis had an equal percent of both (**Supplementary Fig 3**). Adolescents (18 and 19 years of age)

and old adults (65-90 years of age) were approximately 30% of the total population (**Supplementary Fig 4**). The

remaining 70% of the population comprised approximately 31% of young adults (20-39 years) and 39% middle

age (40-64 years) subjects (**Supplementary Fig 4**). Three-fold more female than male adolescents and four-fold

more old-aged males than old-aged females participated in the study, whereas other age groups had roughly

equal numbers of males and females (**Supplementary Table 1**)

**Self-reported medical history responses:** Dental issues, swollen joints, leg cramps and hearing difficulties were

each experienced by 18-26% of the population (**Supplementary Table 2**). Several respondents reported history

of diabetes, blood pressure and cardiovascular diseases in their families. 9% of total respondents reported that

they have been diagnosed with high blood pressure, and 6% were being treated for the disease (**Supplementary**

**Table 2**). Subjects diagnosed with a certain clinical condition and/or undergoing treatment for it may not be the

same individuals. Roughly 55% out of 494 respondents reported they wear glasses, indicating that they have

refractive error vision problems. (**Supplementary Table 2**). Roughly equal numbers of both sexes responded yes

to the majority of questions, with the exception of tobacco addiction, which was reported almost exclusively by

males (**Supplementary Table 2**). **Supplementary Table 3** shows the age-cohort distribution of percentage of the

people who said yes to a particular question (e.g. 17% of the 98 subjects who said they had family history of

diabetes were 18-19 year olds). Barring family history of diabetes, high blood pressure, and thyroid and

cardiovascular diseases; higher percentages of middle- and older-aged adults said yes to the majority of all other

questions (**Supplementary Table 3**). Additionally, higher percentages of individuals in the middle and old age

1  
2 156 groups vs. adolescents and young adults answered yes to medical history questions (e.g. 35% of the 65 subjects  
3  
4 157 in the 18-19 age group said they had a vision problem vs. 67% and 75% of 40-64 and 65-90-year-olds)  
5  
6 158 **(Supplementary Table 4).**

7  
8 159 **Prevalence of obesity and hypertension in males and low BMI in young females:** Vital sign measurements  
9  
10 160 showed that approximately 19% of 455 subjects in the study had elevated blood pressure, and 1% had lower than  
11  
12 161 normal blood pressure (**Table 1**). 22% of the 276 tested males of all age groups had elevated blood pressure  
13  
14 162 measurements compared to 15% of the 179 tested females (**Table 2**). High BMI was measured in approximately  
15  
16 163 40% of the tested population (**Table 1**). Middle age adults (40-64 years) had statistically significantly higher BMI  
17  
18 164 than young adults (20-39 years) and old age subjects (65-90 years) (**Supplementary Table 7**). Middle and old  
19  
20 165 age subjects also had statistically significantly higher BP than adolescents and adult participants in the study  
21  
22 166 (**Supplementary Table 7**). Approximately 18% of the tested population was underweight (**Table 2**). More females  
23  
24 167 in the 18-19 and 20-39 age groups and more males in the 40-64 and 65-90 age groups had lower BMI than  
25  
26 168 subjects in other age groups (**Supplementary Table 5**). Overall, more males aged 20-39 were found to be obese  
27  
28 169 compared to females of that age group ( $p=0.0375$ ) who in fact were scored as underweight by statistical  
29  
30 170 significance. Forty-two subjects, the majority in the 40-64 age group, suffered from hypertension and had high  
31  
32 171 BMI. Underweight males and females between the ages of 40-64 also found to be at higher risk for elevated blood  
33  
34 172 pressure ( $n=9$ ).

35  
36 173 **Comparisons between self-reported medical history and results from vital sign measurements:** Adults  
37  
38 174 aged 40 years and older of both sexes who were classified as abnormal in any vital sign measurement were the  
39  
40 175 largest group of subjects correspondingly reporting family history, being diagnosed with, or receiving treatment for  
41  
42 176 several diseases on the questionnaire. **Supplementary Table 8** lists  $p$ -values and percentages for cross-  
43  
44 177 correlations between self-reported medical histories and results from vital sign measurements. Statistically  
45  
46 178 significant correlations between obesity and subjects who wore glasses (59%), reported high blood pressure  
47  
48 179 (13%) or had a family history of diabetes (25%) or hypertension (21%) were identified ( $p = 0.0024$ ,  $p = 0.0091$ ,  $p =$   
49  
50 180  $0.0384$ ,  $p = 0.0173$ , respectively) (**Supplementary Table 8**). Interestingly, overweight subjects were more  
51  
52 181 statistically significantly likely to be non-smokers; conversely, underweight subjects were more likely to be either  
53  
54 182 addicted to tobacco and/or self-reported smokers ( $p = 0.0406$ ,  $p = 0.0122$ , respectively). Occurrences of high  
55  
56 183 blood pressure cross-correlated with several groups of individuals' self-reporting swollen joints, difficulty walking  
57  
58 184 and diabetes ( $p = 0.0425$ ,  $p = 0.0483$ ,  $p = 0.0004$ , respectively). Subjects reporting either history of hypertension  
59  
60

(n=7) or undergoing hypertension treatment (n=14) were statistically significantly more likely ( $p = 0.0006$ ,  $p = 0.0002$ ) to be measured with high blood pressure during our screening (**Supplementary Table 8**).

**Identification of clinical conditions using TES:** Fig 2 shows representative diagnostic images and associated clinical findings captured by TES. Intraoral fluorescent (63%), tympanic membrane (13%) and oxygen saturation (4%) imaging examinations identified the largest percentage of unhealthy subjects (**Table 1**). Approximately 38% of subjects had dental caries and 28% had one or more teeth missing. Periodontal diseases were found in 15% of the population (**Supplementary Table 11**). Previously undiagnosed subjects with abnormalities in their ECG rhythm strip (n=1), optic nerve imaging (n=9), gait analysis (n=5) and finger-nose coordination (n=3) test results were identified (**Table 1**). The expert physicians annotated all nine subjects identified with abnormal optic nerve heads with a cup-to-disc ratio more than 0.3. All subjects who completed the hand tremor and finger-count tests were found to be normal.

A slightly larger percentage of tested female participants compared to males were determined to be unhealthy across the majority of TES tests, although the differences were not statistically significant with the exception of middle-aged females who were statistically more likely to have poor dental health than middle-aged males ( $p=0.0266$ ). Middle-aged (n=120) and older (n=66) adults of both sexes encompassed more than 70% of all subjects with abnormal oral TES results (**Supplementary table 10**). Statistically higher prevalence of dental diseases was measured in 65-90-year-olds and 40-64-year-olds compared to 18-19-year-olds and 20-39-year-olds ( $p<0.0001$  in all four cases). Low blood oxygen saturation and abnormal tympanic membranes were found in 13 and 26 subjects, respectively, who also had dental issues (**Supplementary table 12**). One subject each had low blood oxygen, tympanic membrane problems and unsatisfactory performance in the gait test. Adults aged 40 and above of both sexes were the majority of the subjects who failed two TES tests.

**Identification of subjects with abnormal vital sign measurements and TES results:** Numbers of subjects who were scored not normal in one test each from TES and vital sign measurement are shown in **Supplementary Table 13**. High and low BMI followed by elevated blood pressure measurements were most prevalent in subjects with abnormal TES results. Underweight individuals made up 18% of the population (**Table 1**), and 42% of these individuals also had low blood oxygen saturation ( $p=0.0110$ ) (**Supplementary Table 13**). Similarly, approximately one third of the individuals with tympanic membrane abnormalities also had low BMI. Abnormal optic disc diameters were measured in four overweight participants (**Supplementary Table 13**). Dental screening identified the largest numbers of unhealthy subjects from the population who were measured with either high BMI, low BMI or elevated blood pressure, but these cross-correlations were not statistically significant due to extensive



1 prevalence poor oral health in the community. Overall, high BMI (39%) and elevated blood pressure (19%) and  
2 215  
3 poor dental health (58%) were widespread in middle-aged and older adults of the population (**Table 1**,  
4 216  
5 **Supplementary tables 5 and 10**).

7 **Comparisons between self-reported medical history and results from TES:** **Table 2** shows percentages of  
8 218  
9 subjects who were scored as not normal in a particular TES test and responded yes to a medical history question.  
10 219  
11 Individuals with swollen joints, hearing, and walking issues were found to be more likely to be scored as abnormal  
12 220  
13 in TES tests compared to other groups. Four subjects (21%) measured with low oxygen saturation were self-  
14 221  
15 reported smokers and this correlation was statistically significant (**Supplementary table 14**). 40% of the subjects  
16 222  
17 for whom we identified tympanic membrane abnormalities reported hearing issues ( $p=0.0053$ ). (**Supplementary**  
18 223  
19 **table 14**). Presence of dental caries, gingivitis and or periodontal diseases was correlated with more statistically  
20 224  
21 significant incidences of various clinical conditions reported in the medical history. High percentages of subjects  
22 225  
23 scored as not normal in the finger-nose ( $n=3$ ) and or gait tests ( $n=5$ ) had reported hearing issues (**Table 2**).  
24 226  
25 Similar to results in vital signs screenings, individuals aged 40 years and older of both sexes were the largest  
26 227  
27 group of subjects who gave affirmative responses to the questionnaire and abnormal TES results, although this  
28 228  
29 was not statistically significant.

30 **TES synergistically identifies unique subset of abnormal individuals in conjunction with vital sign**  
31 230  
32 **measurements:** Data from subjects who completed medical history questionnaire, all vital signs measurements  
33 231  
34 and all TES tests ( $n=111$ ) allowed comparative analyses (**Supplementary Tables 16, 17**). Vital sign  
35 232  
36 measurements identified 32 as normal and 79 as abnormal from these 111 subjects, compared to 41 normal and  
37 233  
38 70 abnormal subjects classified by TES (**Supplementary Table 15**). Our data indicates that similar percentage of  
39 234  
40 these 111 subjects benefitted from diagnosis offered by TES vs. those screened by vital sign measurements.  
41 235  
42 **Table 3** shows the age and gender profiles for 111 subjects and the differential diagnoses between the two  
43 236  
44 screening methods.

45  
46 Overall, we found abnormal BMI measurements and poor dentition led to the majority of the abnormalities  
47 238  
48 in these 111. Tympanic membrane and BP abnormalities were the second-most widespread in this cohort. Self-  
49 239  
50 reported questionnaire responses and TES screening results from these 111 subjects illustrate another use case  
51 240  
52 with value for augmented screening. Several self-reported healthy individuals were found to have either abnormal  
53 241  
54 vital signs ( $n=12$ ) or TES results ( $n=7$ ) or both ( $n=6$ ). Dental and ear issues were the most common TES  
55 242  
56 abnormalities associated with self-reported healthy subjects. Importantly, all seven self-reported healthy subjects  
57 243  
58 identified as abnormal by TES (dental,  $n=5$ ; optic nerve,  $n=1$ ; tympanic membrane,  $n=1$ ) had no previous  
59 244



1  
2 245 diagnoses of these conditions and were different from the 12 individuals with abnormal vital signs. These results  
3  
4 246 indicate the unique and synergistic value of TES in providing comprehensive care in conjunction with vital-sign  
5  
6 247 based screenings.

For peer review only

7  
8  
9  
10  
11  
12  
13  
14  
15  
16  
17  
18  
19  
20  
21  
22  
23  
24  
25  
26  
27  
28  
29  
30  
31  
32  
33  
34  
35  
36  
37  
38  
39  
40  
41  
42  
43  
44  
45  
46  
47  
48  
49  
50  
51  
52  
53  
54  
55  
56  
57  
58  
59  
60

1  
2 248 DISCUSSION

3  
4 249 Many of the subjects identified by TES did not have any abnormal vital signs, indicating that TES can play  
5  
6 250 a role in identifying subjects who need care but would not be identified by vital signs measurements alone. Each  
7  
8 251 TES test identified distinctive abnormalities in different patients and played a distinct role in identifying at-risk or sick  
9  
10 252 individuals. Because the TES tests screen for much different conditions than the vital signs measurements, our  
11  
12 253 results indicate mutually independent but not entirely exclusive performances of both in identifying at-risk or sick  
13  
14 254 subjects. We examined several potential moderators and old age was a statistically significant premonition for  
15  
16 255 abnormal TES results, underscoring the crucial role for augmented screenings in middle-aged and geriatric  
17  
18 256 individuals. Large proportions of subjects identified with abnormalities in oral (65%), tympanic membrane (60%),  
19  
20 257 and retinal (33%) tests, as well as the only subject in the single-lead ECG test, did not report their respective  
21  
22 258 conditions on their medical history questionnaires. This indicates that these subjects were either previously  
23  
24 259 undiagnosed or unaware of their health conditions. TES thus facilitates more thorough and non-invasive primary  
25  
26 260 care screenings and may expedite early interventions as well as improved awareness for undiagnosed patients.

27  
28 261 Vital sign measurements provided valuable insights into the rising epidemics of hypertension and obesity  
29  
30 262 in the screened population in our study. Approximately 19% of the screened population in our study was suffering  
31  
32 263 from hypertension. 18% of the screened population in our study was underweight (BMI <18.5) and several of  
33  
34 264 these subjects were hypoxic, with low oxygen saturation, which can be considered a proxy measure for anemia.  
35  
36 265 Pulseoximetry screenings identified 19 subjects with <90% SpO<sub>2</sub>. Vold et.al, in studies carried out in Norway,  
37  
38 266 have reported high BMI, middle age and smoking as predictors of oxygen saturation[27]. Subjects with low blood  
39  
40 267 oxygen self-reported smoking addiction and asthma. Most of them were middle-aged males, and the majorities  
41  
42 268 were underweight. We also detected optic nerve abnormalities, dental diseases, gait and hearing difficulties in  
43  
44 269 subjects with low blood oxygen, suggesting that a poor overall health status may co-exist with low blood oxygen  
45  
46 270 measurements. Our data suggests the usefulness of deploying pulse oximetry for general health screenings,  
47  
48 271 especially for underweight patients in LMIC.

49  
50 272 Inadequate dental hygiene and resulting sequelae can have significant impact on quality of life and  
51  
52 273 increase the risk of cardiovascular diseases[28, 29]. "Remote monitoring" and "Store-forward" approaches for  
53  
54 274 dental examinations, reviewed elsewhere[30], have been used for teledentistry. In patients aged 65-74 years, the  
55  
56 275 prevalence of caries was 70% and multi-centric oral health survey reported the prevalence of carries to be 51-  
57  
58 276 95% [31]. We found 48% of 65-90-year-olds diagnosed with caries or periodontal disease. A high percentage of  
59  
60

1  
2 277 45-60-year-old subjects in our study, who usually may not have been detected by traditional methods, were  
3  
4 278 identified with poor dental health and may have been detected due to the more comprehensive evaluation offered  
5  
6 279 by TES. Significant cross-correlations between patients reporting cardiovascular treatment with poor oral health  
7  
8 280 ( $p=0.0267$ ) was identified, underscoring the importance of routine dental care and calling for urgent attention to  
9  
10 281 the oral disease epidemic in India.

11  
12 282 There are approximately 11.2 million persons aged 40 years and older with glaucoma in India[32]. The  
13  
14 283 most common optic nerve abnormalities that were detected in our study were optic nerve cupping as a risk factor  
15  
16 284 for glaucoma, and optic nerve head neovascularization that is a sign of diabetic retinopathy. All nine patients who  
17  
18 285 were scored as abnormal by optic nerve photography in our study had a DDLS scores of three, indicating early  
19  
20 286 onset of glaucoma. The majority of these patients were females aged between 20-64 years whereas two old age  
21  
22 287 males were marked abnormal. Four patients were also obese and high blood pressure was measured in two  
23  
24 288 individuals, highlighting vulnerable status of young and middle aged obese Indian population.

25  
26 289 Smartphone-enabled tele-otology has been deemed suitable for both on-site and remote diagnoses of  
27  
28 290 tympanic membrane and Otitis media (OM) previously[33]. Perforated tympanic membranes (48%) and/or  
29  
30 291 effusions (60%) were most prevalent in patients labeled as abnormal by ENT surgeons. These patients may have  
31  
32 292 been suffering from OM infection and or a generalized inflammation. A large segment of these subjects were  
33  
34 293 middle age or older adults and were also the predominant group that failed the gait and coordination test.  
35  
36 294 Physician consensus, imaging data and self-reported hearing issues emphasize the substantial challenges in  
37  
38 295 diagnosing and treating these patients. We did not perform audiology or speeches tests with these subjects and  
39  
40 296 thus are unable to cross correlate the imaging data with functional tests.

41  
42 297 Due to acute shortages of trained neurologists, diagnoses of neurological disorders is extremely  
43  
44 298 challenging in LMIC[34]. Three subjects in the finger-nose test were identified with incoordination and dysmetria.  
45  
46 299 Seven out of the eight total subjects failing neurological tests were males older than 40 years, and three were  
47  
48 300 underweight. The majority of subjects failing either the gait and/or finger-nose tests self-reported swollen joints  
49  
50 301 and a few said that they had difficulty in walking (all subjects were able to walk unassisted). It is conceivable that  
51  
52 302 these issues may be unlinked or causal to their performance in the gait test. However, none of these conditions  
53  
54 303 had previously been diagnosed in these individuals reaffirming a need for more aggressive and large-scale  
55  
56 304 screening using TES methods. We are working on generative algorithms for classification of various neurological  
57  
58 305 disorders and hope to incorporate these in future studies.

1  
2 306 Physicians using TES devices in our study commented that a brief period of acclimatization was  
3  
4 307 necessary in both use and interpretation of results from the devices before use in the study. Incorporating training  
5  
6 308 for use of mobile technologies for diagnoses during medical school can reduce this learning curve. To our  
7  
8 309 surprise, most of our tele-examination physicians could accurately diagnose presented conditions often with  
9  
10 310 overwhelming consensus between them. Patients enrolled in our study were also pleased to see immediate  
11  
12 311 results from TES and get rapid feedback from physicians. We acknowledge that TES devices may provide only an  
13  
14 312 indication of the clinical pathologies they evaluate instead of a thorough diagnosis. Despite the claims made by  
15  
16 313 device manufacturers, we also recognize that in their current form-factor TES will not replace or completely  
17  
18 314 remove the physician from the loop. We used representative, clinically validated devices in this study, and our  
19  
20 315 diagnoses may be generalizable to findings from similar datasets. The numbers of patients examined by TES  
21  
22 316 and vital sign measurements were not identical, precluding a more comprehensive analysis of their performances.  
23  
24 317 Although this work is one of the largest, if not the largest, studies carried out using a wide array of different TES  
25  
26 318 methods, a larger sample size in follow-up studies may result in more comprehensive identification of patient  
27  
28 319 demographics and the full gamut of clinical conditions. We do, however, emphasize that one goal of this study  
29  
30 320 was to conduct a cross-sectional analysis of both the population and the tests instead of focusing on only one  
31  
32 321 TES method with a large sample size.

32  
33 322 While routine vital sign examinations continue to be important in health screenings, this study  
34  
35 323 demonstrates that the emerging techniques of TES can play an important synergistic role in stratifying populations  
36  
37 324 and providing personalized screening and care, especially in LMIC. Multiple TES screening methods and data  
38  
39 325 analyses outlined in this study can help in training and standardization for deployment of augmented, low-cost,  
40  
41 326 non-invasive and portable screening approaches in conjunction with traditional primary healthcare exams, leading  
42  
43 327 to increased clinical interventions, diagnoses and awareness of health conditions for individuals.  
44  
45  
46  
47  
48  
49  
50  
51  
52  
53  
54  
55  
56  
57  
58  
59  
60

**Footnotes**

**Acknowledgments:** We thank physicians, staff, student volunteers and Dr. Sanjay Bhawsar of MGVBHDC for support for conducting this study, Dr. Arun Jamkar and Maharashtra Health and Sciences University, India for guidance to select the location and Krishna Rastogi, Sathya Sai, Hisham Bedri, Geetanjali Rathore, Mayank Kumar and Akshat Wahi for technical assistance. Dr. Judy-Fine Edelstein, Dr. Diana Green and Tek Yadav of Cambridge Health Alliance, Cambridge, MA; Dr. Maneesh Bapaye, Sunil Ugale, Dr Shirish Ghan and Dr. Roma Bagi Nashik, India and Dr. Tulio Valdez, Massachusetts Institute of Technology for help in expert clinical evaluations.

**Licensing:** *The Corresponding Author has the right to grant on behalf of all authors and does grant on behalf of all authors, a worldwide licence to the Publishers and its licensees in perpetuity, in all forms, formats and media (whether known now or created in the future), to i) publish, reproduce, distribute, display and store the Contribution, ii) translate the Contribution into other languages, create adaptations, reprints, include within collections and create summaries, extracts and/or, abstracts of the Contribution, iii) create any other derivative work(s) based on the Contribution, iv) to exploit all subsidiary rights in the Contribution, v) the inclusion of electronic links from the Contribution to third party material where-ever it may be located; and, vi) licence any third party to do any or all of the above."*

**Data sharing:** *Anonymized patient level data and or full dataset will be made available following standard MIT COUHES data sharing protocols.*

**Funding:** *Massachusetts Institute of Technology Media Lab and Karmaveer Bhausahab Hiray Dental College and Hospital departmental funds.*

**Competing interests:** *"All authors have completed the ICMJE uniform disclosure form at [www.icmje.org/coi\\_disclosure.pdf](http://www.icmje.org/coi_disclosure.pdf) and declare: no support from any organisation for the submitted work; no financial relationships with any organisations that might have an interest in the submitted work in the previous three years; no other relationships or activities that could appear to have influenced the submitted work."*

**Author contributions:** *OG, MM, and GY organized the data; PS, OG, and GY did data analysis; PS, SVS, GY, and OG performed literature search; PS, GY, SVS and VP interpreted data; GY made figures; PS and GY wrote the manuscript; RM led clinical data collection; PS supervised the research.*

1  
2 360 FIGURE LEGENDS

3  
4 361  
5 362  
6 363 **Fig 1.** Study design.

7 364 (A) Flowchart for overall screening procedure. (B) Subject being screened for rhythm strip abnormalities using  
8 365 AliveCor Mobile ECG.  
9 366  
10 367  
11 368  
12 369  
13 370

14 371 **Fig 2.** Representative images of labeled conditions detected in technology-enabled screenings.

15 372 (A) Normal images for technology-enabled screenings. Left-to-right, top-to-bottom: dental, periodontal, tympanic  
16 373 membrane, optic nerve, finger-nose.

17 374 (B) Labeled conditions for technology-enabled screenings. Left-to-right, top-to-bottom: caries, missing teeth,  
18 375 periodontal disease, perforated eardrum, effusion, width of optic rim 0.01-0.1, abnormal finger-nose.  
19 376  
20 377  
21 378  
22  
23 379  
24  
25 380  
26 381  
27  
28 382  
29  
30 383  
31 384  
32  
33 385  
34  
35 386  
36  
37 387  
38 388  
39  
40 389  
41  
42 390  
43 391  
44  
45 392  
46  
47 393  
48 394  
49  
50 395  
51  
52 396  
53  
54 397  
55 398  
56  
57 399  
58  
59  
60

1  
2 400  
3  
4  
5  
6  
7  
8  
9  
10  
11  
12  
13  
14  
15  
16  
17  
18  
19  
20  
21  
22  
23  
24  
25  
26  
27  
28  
29  
30  
31  
32  
33  
34  
35 401  
36 402  
37 403  
38 404  
39 405  
40 406  
41  
42  
43  
44  
45  
46  
47  
48  
49  
50  
51  
52  
53  
54  
55  
56  
57  
58  
59  
60

**Table 1. Results of vital signs measurements and technology-enabled screenings.**

|                                      | Female   |        | Male     |        | Total    |        |
|--------------------------------------|----------|--------|----------|--------|----------|--------|
|                                      | Abnormal | Tested | Abnormal | Tested | Abnormal | Tested |
| <b>Vital signs tests</b>             |          |        |          |        |          |        |
| High BMI                             | 75 (39)  | 193    | 121 (40) | 301    | 196 (40) | 494    |
| Low BMI                              | 42 (22)  | 193    | 47 (16)  | 301    | 89 (18)  | 494    |
| High BP                              | 26 (15)  | 179    | 62 (22)  | 276    | 88 (19)  | 455    |
| Low BP                               | 3 (2)    | 179    | 1 (0.4)  | 276    | 4 (1)    | 455    |
| <b>Technology-enabled screenings</b> |          |        |          |        |          |        |
| Low blood oxygen                     | 5 (3)    | 179    | 14 (5)   | 276    | 19 (4)   | 455    |
| Single-lead ECG                      | 0 (0)    | 168    | 1 (0.4)  | 262    | 1 (0.2)  | 430    |
| Oral                                 | 109 (68) | 160    | 151 (60) | 251    | 260 (63) | 411    |
| Retinal                              | 5 (3)    | 169    | 4 (2)    | 235    | 9 (2)    | 404    |
| Tympanic membrane                    | 17 (13)  | 126    | 25 (13)  | 198    | 42 (13)  | 324    |
| Hand tremor                          | 0 (0)    | 127    | 0 (0)    | 186    | 0 (0)    | 313    |
| Finger-nose                          | 0 (0)    | 123    | 3 (2)    | 182    | 3 (1)    | 305    |
| Finger-count                         | 0 (0)    | 122    | 0 (0)    | 177    | 0 (0)    | 299    |
| Gait                                 | 1 (1)    | 104    | 4 (4)    | 110    | 5 (2)    | 214    |

Numbers and percentages (in parentheses) of males and females with conditions identified by vital signs tests and technology-enabled screenings.

**Table 2. Number of subjects identified with a clinical condition by a technology-enabled screening test and responded yes to a medical history question.**

| Abnormality | No. with abnormality | Glasses | Dental | Swollen joints | Hearing | FH diabetes | FH high BP | Tobacco | Difficulty walking | High BP | Diabetes | High BP Rx | Asthma | Smoking | FH cardiac | Cardiac Rx | Cardiovascular | Low BP | FH stroke | FH eye disease | Heart attack | Coronary bypass | Drinking | Eye treatment | Memory loss | Ear treatment | FH ear disease |
|-------------|----------------------|---------|--------|----------------|---------|-------------|------------|---------|--------------------|---------|----------|------------|--------|---------|------------|------------|----------------|--------|-----------|----------------|--------------|-----------------|----------|---------------|-------------|---------------|----------------|
| Hypoxemia   | 19                   | 7       | 9      | 3              | 5       | 2           | 0          | 3       | 3                  | 0       | 0        | 0          | 3      | 4*      | 0          | 1          | 0              | 0      | 0         | 0              | 0            | 0               | 0        | 0             | 0           | 0             | 0              |
| TM          | 42                   | 22      | 14     | 14             | 17      | 7           | 6          | 3       | 5                  | 5       | 4        | 4          | 3      | 1       | 2          | 1          | 1              | 0      | 1         | 0              | 0            | 0               | 0        | 0             | 0           | 1             | 0              |
| Retinal     | 9                    | 6       | 5      | 4              | 4       | 2           | 2          | 0       | 3*                 | 1       | 0        | 1          | 0      | 0       | 0          | 1          | 1              | 0      | 0         | 0              | 0            | 0               | 0        | 0             | 0           | 0             | 0              |
| Oral        | 260                  | 145*    | 82*    | 85*            | 72*     | 41          | 31**       | 27      | 36*                | 30      | 23       | 24*        | 15     | 13      | 7          | 8*         | 4              | 3      | 2         | 3              | 3            | 3               | 1        | 2             | 2           | 1             | 1              |
| Finger-nose | 3                    | 1       | 1      | 3*             | 2       | 0           | 0          | 1       | 3*                 | 0       | 0        | 0          | 1      | 0       | 0          | 0          | 0              | 0      | 0         | 0              | 0            | 0               | 0        | 0             | 0           | 0             | 0              |
| Gait        | 5                    | 1       | 4*     | 4*             | 3       | 1           | 0          | 0       | 1                  | 0       | 0        | 0          | 0      | 1       | 0          | 0          | 0              | 0      | 0         | 0              | 0            | 0               | 0        | 0             | 0           | 0             | 0              |

Total populations reflect the number of subjects with the particular condition in that row. Multiple subjects were associated with more than one condition or questionnaire response.

TM: tympanic membrane.

\*  $p < 0.05$ , subjects are more likely to have responded yes to the column's question and have the condition.

\*\*  $p < 0.05$ , subjects are less likely to have responded yes to the column's question and have the condition.

**Table 3. Synergistic role of technology-enabled screening in identifying at-risk or sick individuals.**

| Vital signs         | TES | Adolescent (18-19) |      | Young adult (20-39) |      | Middle age (40-64) |      | Old age (65-90) |      | Total (n=111) |
|---------------------|-----|--------------------|------|---------------------|------|--------------------|------|-----------------|------|---------------|
|                     |     | Female             | Male | Female              | Male | Female             | Male | Female          | Male |               |
| ✓                   | ✓   | 5                  | 0    | 3                   | 0    | 0                  | 2    | 0               | 0    | 10            |
| x                   | ✓   | 5                  | 0    | 5                   | 12   | 2                  | 6    | 0               | 1    | 31            |
| ✓                   | x   | 4                  | 0    | 5                   | 4    | 5                  | 3    | 0               | 1    | 22            |
| x                   | x   | 5                  | 0    | 3                   | 7    | 9                  | 15   | 2               | 7    | 48            |
| Total in age cohort |     | 19                 | 0    | 16                  | 23   | 16                 | 26   | 2               | 9    | 111           |

Check marks indicate normal status while x indicates abnormalities in a particular screening method.



1  
2 426 REFERENCES  
3

- 4 427 1. Rivo, M. 2008 World Health Report emphasizes importance of primary health care. *Am Fam Physician*.  
5 428 2009;79(12):1051.
- 6 429 2. Alwan, A, Maclean, DR, Riley, LM, et al. Monitoring and surveillance of chronic non-communicable  
8 430 diseases: progress and capacity in high-burden countries. *Lancet*. 2010;376(9755):1861-8.
- 9 431 3. Samb, B, Desai, N, Nishtar, S, et al. Prevention and management of chronic disease: a litmus test for  
10432 health-systems strengthening in low-income and middle-income countries. *Lancet*. 2010;376(9754):1785-97.
- 11433 4. Thakur, J. Key recommendations of high-level expert group report on universal health coverage for  
12434 India. *Indian J Community Med*. 2011;36(Suppl 1):S84-5.
- 13435 5. Shi, L. The impact of primary care: a focused review. *Scientifica (Cairo)*. 2012;2012:432892.
- 14436 6. Dhawan, AP, Heetderks, WJ, Pavel, M, et al. Current and Future Challenges in Point-of-Care  
15437 Technologies: A Paradigm-Shift in Affordable Global Healthcare With Personalized and Preventive Medicine. *IEEE*  
16438 *J Transl Eng Health Med*. 2015;3:2800110.
- 18439 7. Topol, EJ. Transforming medicine via digital innovation. *Sci Transl Med*. 2010;2(16):16cm4.
- 19440 8. Puri, RS, Athanassiadis, AG, Gill, N, et al. Design and preliminary evaluation of a wearable device for  
20441 mass-screening of sleep apnea. *Annual International Conference of the IEEE Engineering in Medicine and Biology*  
21442 *Society 2016;38th*
- 22443 9. Pamplona, VF, Mohan, A, Oliveira, MM, Raskar, R. NETRA: Interactive Display for Estimating Refractive  
23444 Errors and Focal Range. *Acm T Graphic*. 2010;29(4).
- 24445 10. Swedish, T, Roesch, K, Lee, IH, et al. eyeSelfie: Self Directed Eye Alignment using Reciprocal Eye Box  
25446 Imaging. *Acm T Graphic*. 2015;34(4).
- 27447 11. Das, A, Swedish, T, Wahi, A, et al. Mobile phone based mini-spectrometer for rapid screening of skin  
28448 cancer. *Proc Spie*. 2015;9482.
- 29449 12. Giller, G. Using a Smartphone to Detect Cancer. *Sci Am*. 2014;310(5):28-.
- 30450 13. Creuzot-Garcher, C, Martin-Phipps, T, Beynat, J, et al. Effectiveness of a Mobile Diabetic Retinopathy  
31451 Screening Campaign to Encourage Diabetics to Undergo Regular Ophthalmic Follow-Up. *Ophthalmic Res*.  
32452 2014;52(4):206-11.
- 33453 14. Pirnstill, CW, Cote, GL. Malaria Diagnosis Using a Mobile Phone Polarized Microscope. *Sci Rep-Uk*.  
34454 2015;5.
- 35455 15. Granot, Y, Ivorra, A, Rubinsky, B. A new concept for medical imaging centered on cellular phone  
36456 technology. *PLoS One*. 2008;3(4):e2075.
- 38457 16. Jani, IV, Quevedo, JI, Tobaiwa, O, et al. Use of mobile phone technology to improve the quality of point-  
39458 of-care testing in a low-resource setting. *AIDS*. 2016;30(1):159-61.
- 40459 17. Topol, E. Digital medicine: empowering both patients and clinicians. *Lancet*. 2016;388(10046):740-1.
- 41460 18. Muhlestein, JB, Le, V, Albert, D, et al. Smartphone ECG for evaluation of STEMI: results of the ST LEUIS  
42461 Pilot Study. *J Electrocardiol*. 2015;48(2):249-59.
- 43462 19. Rechmann, P, Liou, SW, Rechmann, BM, Featherstone, JD. Performance of a light fluorescence device for  
44463 the detection of microbial plaque and gingival inflammation. *Clin Oral Investig*. 2016;20(1):151-9.
- 45464 20. Gabel, M, Gilad-Bachrach, R, Renshaw, E, Schuster, A. Full Body Gait Analysis with Kinect. *Ieee Eng Med*  
46465 *Bio*. 2012:1960-7.
- 48466 21. Richards, JR, Gaylor, KA, Pilgrim, AJ. Comparison of traditional otoscope to iPhone otoscope in the  
49467 pediatric ED. *Am J Emerg Med*. 2015;33(8):1089-92.
- 50468 22. Eikelboom, RH, Mbaio, MN, Coates, HL, Atlas, MD, Gallop, MA. Validation of tele-otology to diagnose ear  
51469 disease in children. *Int J Pediatr Otorhi*. 2005;69(6):739-44.
- 52470 23. Kopycka-Kedzierawski, DT, Bell, CH, Billings, RJ. Prevalence of dental caries in Early Head Start children  
53471 as diagnosed using teledentistry. *Pediatr Dent*. 2008;30(4):329-33.
- 54472 24. Russo, A, Morescalchi, F, Costagliola, C, Delcassi, L, Semeraro, F. A Novel Device to Exploit the  
55473 Smartphone Camera for Fundus Photography. *J Ophthalmol*. 2015;2015:823139.

- 1  
2 474 25. Baranwal, A, Anand, A, Singh, R, et al. Managing the Earth's Biggest Mass Gathering Event and WASH  
3 475 Conditions: Maha Kumbh Mela (India). *PLoS Curr.* 2015;7.  
4 476 26. Kumar, A, Kalra, S, Unnikrishnan, AG. Metabolic state of the nation: Results of the national family health  
5 477 survey-4. *Indian J Endocrinol Metab.* 2016;20(4):429-31.  
6 478 27. Vold, ML, Aasebo, U, Melbye, H. Low FEV1, smoking history, and obesity are factors associated with  
7 479 oxygen saturation decrease in an adult population cohort. *Int J Chron Obstruct Pulmon Dis.* 2014;9:1225-33.  
8 480 28. DeStefano, F, Anda, RF, Kahn, HS, Williamson, DF, Russell, CM. Dental disease and risk of coronary heart  
9 481 disease and mortality. *BMJ.* 1993;306(6879):688-91.  
10 482 29. Mendez, MV, Scott, T, LaMorte, W, et al. An association between periodontal disease and peripheral  
12 483 vascular disease. *Am J Surg.* 1998;176(2):153-7.  
13 484 30. Jampani, ND, Nutalapati, R, Dontula, BS, Boyapati, R. Applications of teledentistry: A literature review  
14 485 and update. *J Int Soc Prev Community Dent.* 2011;1(2):37-44.  
15 486 31. Veerasamy, A, Kirk, R, Gage, J. Epidemiology of dental caries among adolescents in Tamil Nadu, India. *Int*  
16 487 *Dent J.* 2016;66(3):169-77.  
17 488 32. George, R, Ve, RS, Vijaya, L. Glaucoma in India: estimated burden of disease. *J Glaucoma.*  
18 489 2010;19(6):391-7.  
20 490 33. Mbao, MN, Eikelboom, RH, Atlas, MD, Gallop, MA. Evaluation of video-otoscopes suitable for tele-  
21 491 otology. *Telemed J E-Health.* 2003;9(4):325-30.  
22 492 34. Gourie-Devi, M. Epidemiology of neurological disorders in India: review of background, prevalence and  
23 493 incidence of epilepsy, stroke, Parkinson's disease and tremors. *Neurol India.* 2014;62(6):588-98.  
24  
25 494

STROBE Statement—Checklist of items that should be included in reports of *cohort studies*

| Page(s)             |                              | Item No | Recommendation                                                                                                                                                                                    |
|---------------------|------------------------------|---------|---------------------------------------------------------------------------------------------------------------------------------------------------------------------------------------------------|
| 1                   | <b>Title and abstract</b>    | 1       | (a) Indicate the study's design with a commonly used term in the title or the abstract                                                                                                            |
| 2                   |                              |         | (b) Provide in the abstract an informative and balanced summary of what was done and what was found                                                                                               |
| <b>Introduction</b> |                              |         |                                                                                                                                                                                                   |
| 4                   | Background/rationale         | 2       | Explain the scientific background and rationale for the investigation being reported                                                                                                              |
| 5                   | Objectives                   | 3       | State specific objectives, including any prespecified hypotheses                                                                                                                                  |
| <b>Methods</b>      |                              |         |                                                                                                                                                                                                   |
| 6                   | Study design                 | 4       | Present key elements of study design early in the paper                                                                                                                                           |
| 6                   | Setting                      | 5       | Describe the setting, locations, and relevant dates, including periods of recruitment, exposure, follow-up, and data collection                                                                   |
| 6, 22               | Participants                 | 6       | (a) Give the eligibility criteria, and the sources and methods of selection of participants. Describe methods of follow-up                                                                        |
| n/a                 |                              |         | (b) For matched studies, give matching criteria and number of exposed and unexposed                                                                                                               |
| 6, 22, 23           | Variables                    | 7       | Clearly define all outcomes, exposures, predictors, potential confounders, and effect modifiers. Give diagnostic criteria, if applicable                                                          |
| 6, 22, 23           | Data sources/<br>measurement | 8*      | For each variable of interest, give sources of data and details of methods of assessment (measurement). Describe comparability of assessment methods if there is more than one group              |
| 22, 27              | Bias                         | 9       | Describe any efforts to address potential sources of bias                                                                                                                                         |
| 22                  | Study size                   | 10      | Explain how the study size was arrived at                                                                                                                                                         |
| 23                  | Quantitative variables       | 11      | Explain how quantitative variables were handled in the analyses. If applicable, describe which groupings were chosen and why                                                                      |
| 23, 24              | Statistical methods          | 12      | (a) Describe all statistical methods, including those used to control for confounding                                                                                                             |
| 23, 24              |                              |         | (b) Describe any methods used to examine subgroups and interactions                                                                                                                               |
| 11                  |                              |         | (c) Explain how missing data were addressed                                                                                                                                                       |
| n/a                 |                              |         | (d) If applicable, explain how loss to follow-up was addressed                                                                                                                                    |
| n/a                 |                              |         | (e) Describe any sensitivity analyses                                                                                                                                                             |
| <b>Results</b>      |                              |         |                                                                                                                                                                                                   |
| 17, 27              | Participants                 | 13*     | (a) Report numbers of individuals at each stage of study—eg numbers potentially eligible, examined for eligibility, confirmed eligible, included in the study, completing follow-up, and analysed |
| 22                  |                              |         | (b) Give reasons for non-participation at each stage                                                                                                                                              |
| 38                  |                              |         | (c) Consider use of a flow diagram                                                                                                                                                                |

|    |          |                          |     |                                                                                                                                                                                                              |
|----|----------|--------------------------|-----|--------------------------------------------------------------------------------------------------------------------------------------------------------------------------------------------------------------|
| 1  | 26, 28   | Descriptive data         | 14* | (a) Give characteristics of study participants (eg demographic, clinical, social) and information on exposures and potential confounders                                                                     |
| 2  |          |                          |     |                                                                                                                                                                                                              |
| 3  |          |                          |     |                                                                                                                                                                                                              |
| 4  | 17       |                          |     | (b) Indicate number of participants with missing data for each variable of interest                                                                                                                          |
| 5  |          |                          |     |                                                                                                                                                                                                              |
| 6  | n/a      |                          |     | (c) Summarise follow-up time (eg, average and total amount)                                                                                                                                                  |
| 7  |          |                          |     |                                                                                                                                                                                                              |
| 8  | n/a      | Outcome data             | 15* | Report numbers of outcome events or summary measures over time                                                                                                                                               |
| 9  |          |                          |     |                                                                                                                                                                                                              |
| 10 | 7-11, 18 | Main results             | 16  | (a) Give unadjusted estimates and, if applicable, confounder-adjusted estimates and their precision (eg, 95% confidence interval). Make clear which confounders were adjusted for and why they were included |
| 11 |          |                          |     |                                                                                                                                                                                                              |
| 12 |          |                          |     |                                                                                                                                                                                                              |
| 13 |          |                          |     |                                                                                                                                                                                                              |
| 14 |          |                          |     |                                                                                                                                                                                                              |
| 15 |          |                          |     |                                                                                                                                                                                                              |
| 16 |          |                          |     |                                                                                                                                                                                                              |
| 17 | 23       |                          |     | (b) Report category boundaries when continuous variables were categorized                                                                                                                                    |
| 18 |          |                          |     |                                                                                                                                                                                                              |
| 19 | n/a      |                          |     | (c) If relevant, consider translating estimates of relative risk into absolute risk for a meaningful time period                                                                                             |
| 20 |          |                          |     |                                                                                                                                                                                                              |
| 21 | 7-11     | Other analyses           | 17  | Report other analyses done—eg analyses of subgroups and interactions, and sensitivity analyses                                                                                                               |
| 22 |          |                          |     |                                                                                                                                                                                                              |
| 23 |          |                          |     |                                                                                                                                                                                                              |
| 24 |          |                          |     |                                                                                                                                                                                                              |
| 25 |          | <b>Discussion</b>        |     |                                                                                                                                                                                                              |
| 26 | 12       | Key results              | 18  | Summarise key results with reference to study objectives                                                                                                                                                     |
| 27 |          |                          |     |                                                                                                                                                                                                              |
| 28 | 14       | Limitations              | 19  | Discuss limitations of the study, taking into account sources of potential bias or imprecision. Discuss both direction and magnitude of any potential bias                                                   |
| 29 |          |                          |     |                                                                                                                                                                                                              |
| 30 |          |                          |     |                                                                                                                                                                                                              |
| 31 |          |                          |     |                                                                                                                                                                                                              |
| 32 | 12, 14   | Interpretation           | 20  | Give a cautious overall interpretation of results considering objectives, limitations, multiplicity of analyses, results from similar studies, and other relevant evidence                                   |
| 33 |          |                          |     |                                                                                                                                                                                                              |
| 34 |          |                          |     |                                                                                                                                                                                                              |
| 35 |          |                          |     |                                                                                                                                                                                                              |
| 36 |          |                          |     |                                                                                                                                                                                                              |
| 37 | 14       | Generalisability         | 21  | Discuss the generalisability (external validity) of the study results                                                                                                                                        |
| 38 |          |                          |     |                                                                                                                                                                                                              |
| 39 |          | <b>Other information</b> |     |                                                                                                                                                                                                              |
| 40 | 15       | Funding                  | 22  | Give the source of funding and the role of the funders for the present study and, if applicable, for the original study on which the present article is based                                                |
| 41 |          |                          |     |                                                                                                                                                                                                              |
| 42 |          |                          |     |                                                                                                                                                                                                              |
| 43 |          |                          |     |                                                                                                                                                                                                              |
| 44 |          |                          |     |                                                                                                                                                                                                              |

\*Give information separately for exposed and unexposed groups.

**Note:** An Explanation and Elaboration article discusses each checklist item and gives methodological background and published examples of transparent reporting. The STROBE checklist is best used in conjunction with this article (freely available on the Web sites of PLoS Medicine at <http://www.plosmedicine.org/>, Annals of Internal Medicine at <http://www.annals.org/>, and Epidemiology at <http://www.epidem.com/>). Information on the STROBE Initiative is available at <http://www.strobe-statement.org>.

1  
2  
3  
4  
5  
6  
7  
8  
9  
10  
11  
12  
13  
14  
15  
16  
17  
18  
19  
20  
21  
22  
23  
24  
25  
26  
27  
28  
29  
30  
31  
32  
33  
34  
35  
36  
37  
38  
39  
40  
41  
42  
43  
44  
45  
46  
47  
48  
49  
50  
51  
52  
53  
54  
55  
56  
57  
58  
59  
60

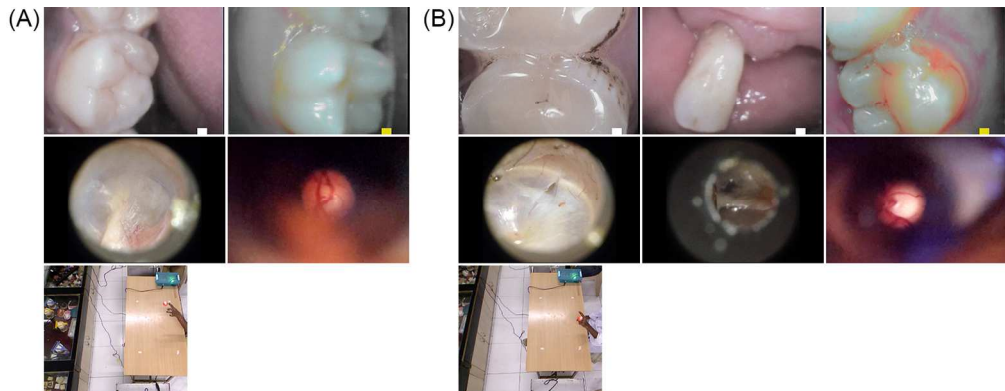

149x57mm (300 x 300 DPI)

Peer review only

1  
2  
3  
4  
5  
6  
7  
8  
9  
10  
11  
12  
13  
14  
15  
16  
17  
18  
19  
20  
21  
22  
23  
24  
25  
26  
27  
28  
29  
30  
31  
32  
33  
34  
35  
36  
37  
38  
39  
40  
41  
42  
43  
44  
45  
46  
47  
48  
49  
50  
51  
52  
53  
54  
55  
56  
57  
58  
59  
60

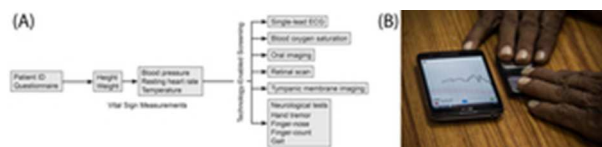

25x5mm (300 x 300 DPI)

For peer review only

1  
2 **1 Supplementary Appendix**  
3 2  
4 3 Contents  
5 4 Page 2: Supplementary Methods  
6 5 Page 4: Supplementary Figures  
7 6 Page 7: Supplementary Tables  
8  
9  
10  
11  
12  
13  
14  
15  
16  
17  
18  
19  
20  
21  
22  
23  
24  
25  
26  
27  
28  
29  
30  
31  
32  
33  
34  
35  
36  
37  
38  
39  
40  
41  
42  
43  
44  
45  
46  
47  
48  
49  
50  
51  
52  
53  
54  
55  
56  
57  
58  
59  
60

For peer review only

## Supplementary Methods

**Criteria, ethical considerations and consent procedure:** Mahatma Gandhi Vidyamandir Karmaveer Bhausaheb Hiray Dental College & Hospital (MGVKBHDC) in Nashik was designated as one of the primary health provision and disaster management centers for the 2015 Sinhasht Kumbh Mela (14 July-25 September). The hospital has an outpatient facility where pilgrims and local people were provided care, information and a resting area throughout the event. Indians between the ages of 18 years and 90 years of all ethnicities, races and genders were included in the study. Subjects younger than 18 years or older than 90 years were excluded from participation. 494 consenting adults were seen in the week that MGVKBHDC was soliciting volunteers. We anticipated pilgrims and out-of-state consenting adults would be the largest group to volunteer to be enrolled in this study, allowing us to examine inhabitants from all over the county, but local Indians were also allowed to participate. MGVKBHDC institutional human subjects review committee approved our consent procedure, clinical data collection and the plan for communication of testing results with the subjects (Protocol number: MGVKBHDC/15-16/571). Bilingual physicians from MGVKBHDC explained the scope of the study and consent forms (in English or Hindi) to subjects who were interested in participating. Subjects were asked to sign the consent forms and then remain in a waiting area before active participation in the study. Participants were free to leave at any point during their screenings. MGVKBHDC primary care physicians, dentists, ophthalmologists, otolaryngologists and neurologists performed the health screenings in the order outlined in **Fig 1**, communicated the results to subjects and provided appropriate referrals to patients needing additional medical care. De-identified data was transferred to the Massachusetts Institute of Technology (MIT) investigators for analysis after approval of the protocol by the MIT Committee on the Use of Humans as Experimental Subjects (MIT COUHES protocol number: 1512338971).

**Data collection:** A unique registration number (1-494) linked to each subject was used to store and annotate data from screening kiosks.

**Medical history and vital signs:** Self-reported responses of subjects to a detailed computerized questionnaire that included geographic and demographic questions, questions about past medical history and current illnesses. A bilingual physician recorded the medications and symptoms reported by the subjects as well as their reports of family medical history. An Omron 10 series wireless upper arm monitor with cuff (Model: BP786N) was used to collect systolic and diastolic blood pressure following the manufacturer's instructions (Omron Electronics, USA). Temperatures were measured using a digital thermometer. Height and body weight were measured using a digital scale and were recorded for all subjects.

### Technology-enabled screening devices:

**Blood oxygen saturation:** A CMS 50-DL Pulse Oximeter (Contec Medical Systems, USA) was used to measure blood oxygen saturation levels of hemoglobin based on photoplethysmographic pulses and pulse rate from subjects' right index fingertips [34].

**ECG:** The AliveCor Mobile ECG (AliveCor Inc, USA) is a single-channel cardiac event recorder consisting of a device and smartphone app that can record and review ECGs [20]. A 30-second rhythm strip (lead I) recording was uploaded wirelessly for interpretation via the AliveCor algorithm, and an ECG analysis that indicated heart rate and presence of possible atrial fibrillation was displayed on the mobile phone. Before each use, a physician cleaned the two electrodes with alcohol-based sanitizer and launched the app on the smartphone (Nexus5, LG, South Korea).

**Tympanic membrane imaging:** Inspection of the external ear canal and eardrum was performed using the iPhone5 LEDs and camera with the CellScope Oto phone adapter (CellScope Inc. USA) [24]. A disposable ear tip attached to the device canula was used for imaging each subject.

**Oral imaging:** A commercially available FDA-approved intraoral camera with software, SOPROCARE (SOPRO Acteon Imaging, France), that automatically segments and displays images of plaque, caries and periodontal diseases was used [21]. Panning 30-second videos of the buccal surfaces of the upper first molars (16, 26), the buccal surface of the upper laterals (12, 22), the buccal surface of first lower molars (36, 46), as well as incisal, buccal and lingual surfaces of all accessible teeth were collected. The housing of the camera stick was covered in a clear disposable plastic sheath (U-line, USA) and sterile disposable camera bag. Subjects and clinicians wore UV protective eyewear during oral imaging. Images and video were collected by each of the following modes: (A) only 405nm LEDs powered, (B) only 450nm LEDs powered, (C) only white LEDs powered. A HP 620 Notebook (Hewlett Packard, USA), Windows 7, (Microsoft Corporation, USA) with preloaded



SOPROCARE software was used to store images and videos. A specialized scale for assigning patient scores vs. conventional DMFT (number of decayed, missing and filled teeth in an individual and in a population) or the Russell's periodontal indices [35] was used by dentist examining the data. The camera system uses standard white light and three blue LEDs that emit non-ionizing light at 450 nm wavelengths. Inflamed gingiva can be scored due to fluorescence from porphyrins in blood. Illumination of microbial plaque with blue light induces fluorescence due to the bacteria and porphyrin content of the plaque.

**Optic nerve head photography:** Non-mydriatic digital retinal imaging using the D-EYE (D-EYE Srl, USA) direct ophthalmoscopy adapter [31] attached to iPhone5s camera was performed to capture video and still images of optic nerves of subjects.

**Gait and coordination analyses:** The Microsoft Kinect (Microsoft Corporation, USA) sensor has an RGB camera, depth sensor and multi-array microphone, which provide full-body 3D motion capture, facial and voice recognition capabilities [22]. A 2D, depth and skeleton motion dataset of motor skills, hand-eye coordination, depth perception, neuromuscular stability of individual subjects was captured by the following protocol: a) finger-nose test with index finger touching a ball suspended from the ceiling two feet in front and then the nose: to identify tremors, incoordination, and dysmetria [36]; b) finger-count dexterity test to count to five using thumb touching fingertips: to detect slowness, tremors, and incoordination [37]; c) holding out hands steadily with palms facing down: to detect tremors and arm drift (upward, downward and lateral) [37]; d) walking a distance of 2.5 meters in a straight line, turning around and walking back: to identify subjects who have posture abnormalities, tremors, imbalance (left/right), a penguin gait, or an asymmetric gait while walking [38]. Kinect sensors placed in front of and behind subjects were used to capture the walking in straight-line actions (**Supplementary Fig 1B**). For all other tests, one Kinect sensor was placed unobtrusively to the left or right of the subjects (**Supplementary Fig 1A**).

**Data analyses:** De-identified data assigned to unique subject IDs was split into five separate pools consisting of optic nerve, tympanic membrane, ear, oral and neurological videos for all study participants. BMI, blood pressure, resting heart rate and body temperature are routinely measured without sophisticated TES by most primary care providers and have been collectively annotated as "vital signs" throughout this study. Other imaging and smartphone-based tests have been designated as TES methods. Vital signs and responses to medical questionnaires were grouped together for computational analyses. Resting heart rate and temperature have clinically well-defined normal, high and low ranges. For BMI, numbers less than 19 were labeled low, between 19 and 25 were characterized as normal, and 25 and above were considered high. For blood pressure, systolic pressure below 90 mmHg or diastolic pressure below 60 mmHg was considered low, systolic pressure between 90 and 140 mmHg and diastolic pressure between 60 and 90 mmHg was labeled normal, and systolic pressure above 140 mmHg or diastolic pressure above 90 mmHg was labeled high. Blood oxygen levels of 90% or less were annotated low. The outputs from the AliveCor mobile app were readily used as annotations for ECG tests because they were labeled 'Normal' or 'Possible atrial fibrillation'.

Expert physicians via a web-based examination portal conducted diagnostic feature annotation of de-identified images and videos collected by TES. This password-protected secure interface displayed an image or video for one patient at a time for a given examination. Annotators were able to mark specific features in the videos by drawing boxes around them that paused that specific frame, assign an overall score of 1 (best) to 5 (worst) for the entire video, and to write clinical features that were present for specific frames or the entire video (**Supplementary Fig 2**). A panel of at least three physicians for each type of examination was assembled and independently of each other remotely annotated the data facilitated by the web interface. Due to the greater quantity of Microsoft Kinect videos, three physician-trained raters annotated all the videos, and then an expert physician ratified their labels. The interface for optic nerve videos used a previously described Disc Damage Likelihood Scale (DDLS) scale for glaucoma screening [39]. The majority ratings for each subject were computed for all TES tests. For subjects with no majority rating, the lesser of the tied ratings was chosen to not overstate the prevalence of diagnosed illnesses. Results from each test were analyzed for cross-correlations with self-reported medical history responses, age and sex. Clinical findings for individuals who were tested at all six screening kiosks were also analyzed to generate population health profiles. Efficacy of Vital Sign measurements vs. TES to identify at-risk or sick individuals examined during the study is discussed in the manuscript.

**Statistical methods:** Fisher's exact test was used to determine statistically significant correlations between diagnoses using TES or vital sign measurements and number, age, sex and questionnaire responses of participating subjects. The significance threshold was set at  $p < 0.05$ . To determine in **Supplementary Table 7** whether high BMI was statistically more prevalent in one particular age cohort (out of a total of four age groups), we calculated four proportions representing the number of

1  
2 109 subjects in a specific age cohort who had high BMI compared to the total number of subjects in that age cohort. Each  
3 110 proportion was compared pairwise using Fisher's exact test, which reported  $p$ -values of 0.0014 and 0.0052 when comparing  
4 111 the proportion from the middle age cohort to the proportions from the young adult and old age cohorts, respectively. In  
5 112 **Supplementary Table 8** to determine that there is a statistically significant correlation between a subject being measured for  
6 113 high BMI and responding that they wear glasses, we calculated two proportions: 1) the number of subjects who had high  
7 114 BMI and said they wear glasses (115) compared to the total number of subjects with high BMI (196), and 2) the number of  
8 115 subjects who did not have high BMI and said they wear glasses (132) compared to the number of subjects who did not have  
9 116 high BMI regardless of whether they wear glasses (298). Fisher's exact test reported a  $p$ -value of 0.0024 when comparing  
10 117 these proportions, so we conclude that the correlation between high BMI and wearing glasses is significant. Analyses were  
11 118 performed on groups of subjects who completed each individual test to avoid considering subjects who did not have that test  
12 119 performed.  
13 119  
14 120

15  
16  
17  
18  
19  
20  
21  
22  
23  
24  
25  
26  
27  
28  
29  
30  
31  
32  
33  
34  
35  
36  
37  
38  
39  
40  
41  
42  
43  
44  
45  
46  
47  
48  
49  
50  
51  
52  
53  
54  
55  
56  
57  
58  
59  
60

For peer review only

1  
2  
3  
4  
5  
6  
7  
8  
9  
10  
11  
12  
13  
14  
15  
16  
17  
18  
19  
20  
21  
22  
23  
24  
25  
26  
27  
28  
29  
30  
31  
32  
33  
34  
35  
36  
37  
38  
39  
40  
41  
42  
43  
44  
45  
46  
47  
48  
49  
50  
51  
52  
53  
54  
55  
56  
57  
58  
59  
60

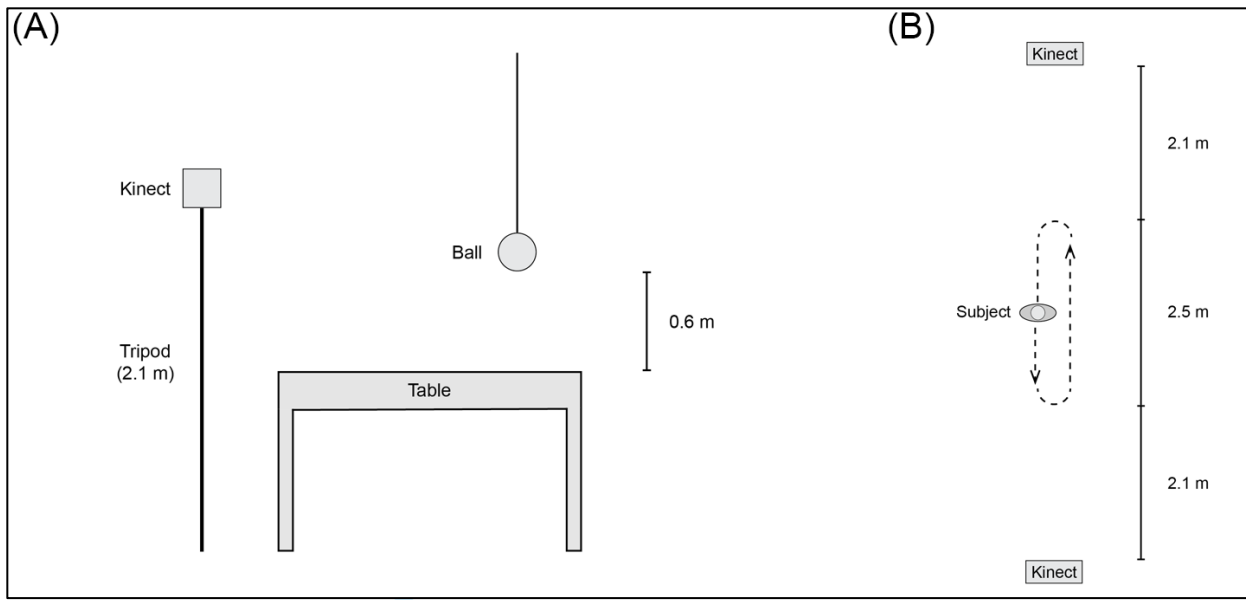

**Supplementary Fig 1.** Diagram of Microsoft Kinect placement for gait and coordination screening tests.

(A) Finger-nose test, from the side. Both the Kinect and ball are centered over the table with the patient facing the ball and the Kinect.  
 (B) Gait test, top-down. Both Kinects are 1 m off the ground and the subject walks in a straight line between them.

**Subject ID: 1**

Please select eye health of subject using Disc Damage Likelihood scale!

- 0 Narrowest width of rim 0.3 - 0.5 (Excellent)
- 1 Narrowest width of rim 0.2 - 0.29
- 2 Narrowest width of rim 0.1 - 0.19
- 3 Narrowest width of rim 0.01 - 0.1
- 4 No rim < 45°
- 5 No rim 45° - 90°
- 6 No rim 91° - 180°
- 7 No rim > 181° (Worst)

**Table of Annotations:**

In case of issues, Please hit refresh!

Frame Normal Annotation Add / Remove ?

[Instructions](#) [Logout](#)

Previous Save! Replay Next

Normal  Abnormal  Frame no [0]

Comment  Add Annotation

**Subject ID: 35**

Please select overall health of subject from this video!

- 1 (Excellent)
- 2
- 3
- 4
- 5 (Worst)

**Table of Annotations:**

In case of issues, Please hit refresh!

Frame Normal Annotation Add / Remove ?

[Instructions](#) [Logout](#)

Previous Save! Replay Next

Normal  Abnormal  Frame no [117]

Comment  Add Annotation

**Subject ID: 5**

Please select overall health of subject from this video!

- 1 (Excellent)
- 2
- 3
- 4
- 5 (Worst)

**Table of Annotations:**

In case of issues, Please hit refresh!

Frame Normal Annotation Add / Remove ?

[Instructions](#) [Logout](#)

Previous Save! Replay Next

Normal  Abnormal  Frame no [78]

Comment  Add Annotation

**Subject ID: 237**

Please select overall health of subject from this video!

- 1. (Best) Healthy teeth and gums, with no visible signs of plaque, caries and gingivitis/bleeding.
- 2. Dental plaque visible on several teeth.
- 3. Plaque + mild inflammation of gums, maybe some early carious lesions
- 4. Plaque + calculus, early gingivitis, mild localized bleeding
- 5. Calculus + tartar, loss of several teeth, prevalent decay, profound gingivitis, bleeding, early stage periodontal disease.
- 6. (Worst) Loss of several teeth, advanced periodontal disease, profound decay etc.

**Permanent Teeth**

**Table of Annotations:**

In case of issues, Please hit refresh!

Frame Normal Annotation Add / Remove ?

[Instructions](#) [Logout](#)

Previous Finish User! Replay Next

Normal  Abnormal  Frame no [0]

Comment  Add Annotation

**Supplementary Fig 2.** Web interfaces for remote annotation used by physician experts for clinical evaluations. Clockwise from top left: retinal scan, tympanic membrane imaging, gait and coordination tests, oral imaging

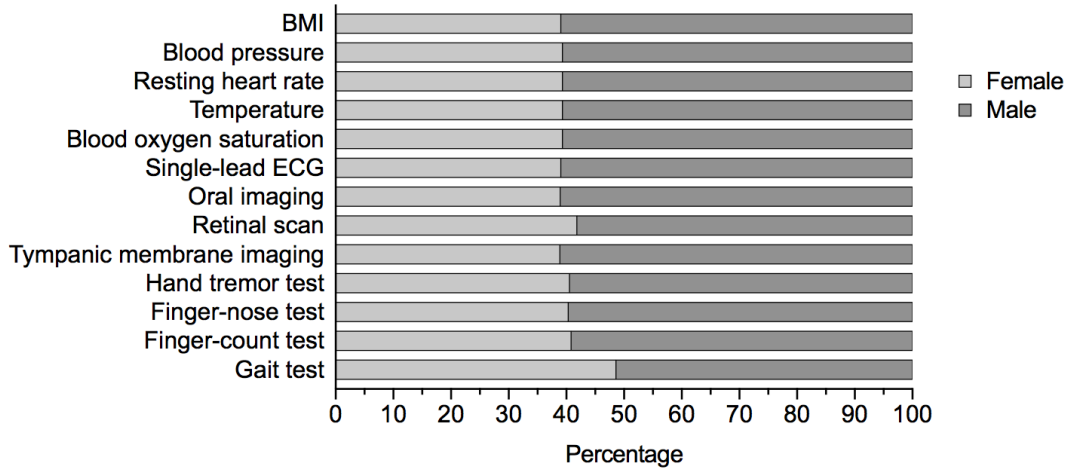

Supplementary Fig 3. Percentage of test populations of each gender.

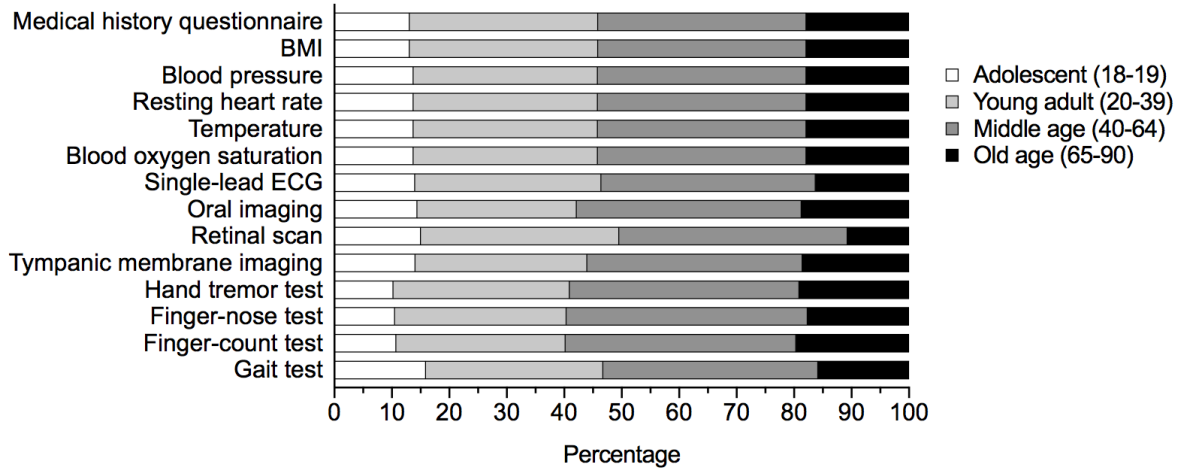

Supplementary Fig 4. Percentage of test populations in each age cohort. Age ranges for each cohort are in parentheses.

Supplementary Table 1. Test populations divided by gender and age cohorts.

|                               | Adolescent (18-19) |      |       | Young adult (20-39) |      |       | Middle age (40-64) |      |       | Old age (65-90) |      |       |
|-------------------------------|--------------------|------|-------|---------------------|------|-------|--------------------|------|-------|-----------------|------|-------|
|                               | Female             | Male | Total | Female              | Male | Total | Female             | Male | Total | Female          | Male | Total |
| Medical history               | 39                 | 26   | 65    | 64                  | 88   | 152   | 73                 | 115  | 188   | 17              | 72   | 89    |
| Body mass index               | 39                 | 26   | 65    | 64                  | 88   | 152   | 73                 | 115  | 188   | 17              | 72   | 89    |
| Blood pressure                | 38                 | 25   | 63    | 56                  | 81   | 137   | 69                 | 104  | 173   | 16              | 66   | 82    |
| Resting heart rate            | 38                 | 25   | 63    | 56                  | 81   | 137   | 69                 | 104  | 173   | 16              | 66   | 82    |
| Temperature                   | 38                 | 25   | 63    | 56                  | 81   | 137   | 69                 | 104  | 173   | 16              | 66   | 82    |
| Blood oxygen saturation       | 38                 | 25   | 63    | 56                  | 81   | 137   | 69                 | 104  | 173   | 16              | 66   | 82    |
| Single-lead electrocardiogram | 36                 | 25   | 61    | 58                  | 81   | 139   | 60                 | 100  | 160   | 14              | 56   | 70    |
| Oral imaging                  | 37                 | 22   | 59    | 43                  | 71   | 114   | 65                 | 96   | 161   | 15              | 62   | 77    |
| Retinal scan                  | 37                 | 23   | 60    | 61                  | 79   | 140   | 63                 | 97   | 160   | 8               | 36   | 44    |
| Tympanic membrane imaging     | 30                 | 9    | 39    | 35                  | 52   | 87    | 49                 | 80   | 129   | 12              | 57   | 69    |
| Hand tremor test              | 24                 | 8    | 32    | 41                  | 55   | 96    | 50                 | 75   | 125   | 12              | 48   | 60    |
| Finger-nose test              | 24                 | 8    | 32    | 37                  | 54   | 91    | 50                 | 78   | 128   | 12              | 42   | 54    |
| Finger-count test             | 24                 | 8    | 32    | 36                  | 52   | 88    | 49                 | 71   | 120   | 13              | 46   | 59    |
| Gait test                     | 30                 | 4    | 34    | 33                  | 33   | 66    | 34                 | 46   | 80    | 7               | 27   | 34    |

Age ranges in years for each age cohort are in parentheses.

1 145  
2 146  
3  
4  
5  
6  
7  
8  
9  
10  
11  
12  
13  
14  
15  
16  
17  
18  
19  
20  
21  
22  
23  
24  
25  
26  
27  
28  
29  
30  
31  
32  
33  
34  
35  
36  
37  
38  
39  
40  
41  
42  
43  
44  
45  
46  
47  
48  
49  
50  
51  
52  
53  
54  
55  
56  
57  
58  
59  
60

**Supplementary Table 2. Gender breakdown of self-reported medical history.**

|                                       | Female (n=193) | Male (n=301) | Total (n=494) |
|---------------------------------------|----------------|--------------|---------------|
| Glasses                               | 55             | 47           | 50            |
| Dental                                | 21             | 29           | 26            |
| Swollen joints                        | 25             | 25           | 25            |
| Hearing                               | 17             | 25           | 22            |
| Family history of diabetes            | 22             | 18           | 20            |
| Leg cramps                            | 20             | 18           | 19            |
| Family history of high blood pressure | 21             | 13           | 16            |
| Fatigue                               | 16             | 16           | 16            |
| Acidity                               | 20             | 11           | 15            |
| Tiredness                             | 13             | 15           | 14            |
| Tobacco addiction                     | 2              | 18           | 11            |
| Surgery                               | 10             | 10           | 10            |
| Difficulty walking                    | 10             | 10           | 10            |
| High blood pressure                   | 10             | 8            | 9             |
| Diabetes                              | 7              | 9            | 8             |
| Snore Loudly                          | 5              | 9            | 7             |
| High blood pressure treatment         | 7              | 6            | 6             |
| Environmental allergies               | 8              | 4            | 6             |
| Sleepiness                            | 5              | 6            | 5             |
| Medication allergies                  | 6              | 5            | 5             |
| Asthma                                | 5              | 5            | 5             |
| Smoking addiction                     | 0              | 8            | 5             |
| Family history of cardiac diseases    | 3              | 3            | 3             |
| Family history of asthma              | 3              | 3            | 3             |
| Thyroid                               | 6              | 1            | 3             |
| Self-medication                       | 1              | 4            | 3             |
| Jewelry allergies                     | 6              | 0            | 2             |
| Past skin infection                   | 3              | 2            | 2             |
| Family history of thyroid disease     | 2              | 2            | 2             |
| Cardiac treatment                     | 1              | 3            | 2             |
| Stop breathing during sleep           | 1              | 2            | 2             |
| Oral infection                        | 2              | 2            | 2             |
| Kidney disorder                       | 2              | 1            | 2             |
| Skin problem                          | 1              | 2            | 2             |
| Skin infection                        | 0.5            | 2            | 1             |
| Food allergies                        | 2              | 1            | 1             |
| Hyperactivity                         | 2              | 1            | 1             |
| Cardiovascular                        | 0.5            | 2            | 1             |
| Migraine                              | 2              | 1            | 1             |
| Low blood pressure                    | 3              | 0.3          | 1             |
| Family history of stroke              | 2              | 0.3          | 1             |
| Past ear infection                    | 0.5            | 1            | 0.8           |
| Family history of eye disease         | 0.5            | 1            | 0.8           |
| Heart attack                          | 0              | 1            | 0.8           |
| Material allergies                    | 1              | 1            | 0.8           |
| Anxiety                               | 0.5            | 1            | 0.8           |
| Injury in past 6 months               | 1              | 1            | 0.8           |
| Family history of depression          | 1              | 0.3          | 0.6           |
| Coronary bypass surgery               | 0              | 1            | 0.6           |
| Attention deficit disorder            | 1              | 0            | 0.6           |
| Drinking addiction                    | 0              | 1            | 0.6           |
| Eye treatment                         | 0.5            | 0.3          | 0.4           |
| Family history of skin disease        | 0.5            | 0.3          | 0.4           |
| Memory loss                           | 1              | 0            | 0.4           |
| Ear treatment                         | 0.5            | 0.3          | 0.4           |
| Lung diseases                         | 0.5            | 0.3          | 0.4           |
| Family history of ear disease         | 0              | 0.7          | 0.4           |
| Cancer                                | 0.5            | 0            | 0.2           |
| Sexually transmitted disease          | 0              | 0.3          | 0.2           |
| Liver disease                         | 0.5            | 0            | 0.2           |
| Skin treatment                        | 0.5            | 0            | 0.2           |
| Past gastric infection                | 0              | 0.3          | 0.2           |
| Depression                            | 0              | 0            | 0             |
| Sleep disorder treatment              | 0              | 0            | 0             |
| Heart murmur                          | 0              | 0            | 0             |
| Past lung infection                   | 0              | 0            | 0             |

Percentage of total population by gender who answered yes to each medical history question.

**Supplementary Table 3. Age cohort breakdown of self-reported medical history.**

|                                       | Adolescent (18-19) | Young adult (20-39) | Middle age (40-64) | Old age (65-90) |
|---------------------------------------|--------------------|---------------------|--------------------|-----------------|
| Glasses                               | 11                 | 21                  | 47                 | 21              |
| Dental                                | 3                  | 22                  | 53                 | 22              |
| Swollen joints                        | 0                  | 10                  | 51                 | 38              |
| Hearing                               | 1                  | 7                   | 50                 | 42              |
| Family history of diabetes            | 17                 | 44                  | 34                 | 5               |
| Leg cramps                            | 0                  | 15                  | 47                 | 38              |
| Family history of high blood pressure | 18                 | 46                  | 33                 | 4               |
| Fatigue                               | 1                  | 21                  | 55                 | 23              |
| Acidity                               | 5                  | 30                  | 47                 | 18              |
| Tiredness                             | 3                  | 21                  | 53                 | 23              |
| Tobacco addiction                     | 0                  | 18                  | 46                 | 36              |
| Surgery                               | 8                  | 18                  | 37                 | 37              |
| Difficulty walking                    | 0                  | 2                   | 49                 | 49              |
| High blood pressure                   | 0                  | 9                   | 57                 | 34              |
| Diabetes                              | 0                  | 15                  | 64                 | 21              |
| Snore Loudly                          | 0                  | 27                  | 65                 | 8               |
| High blood pressure treatment         | 0                  | 6                   | 55                 | 39              |
| Environmental allergies               | 17                 | 41                  | 34                 | 7               |
| Sleepiness                            | 4                  | 7                   | 63                 | 26              |
| Medication allergies                  | 15                 | 15                  | 54                 | 15              |
| Asthma                                | 0                  | 4                   | 67                 | 29              |
| Smoking addiction                     | 0                  | 9                   | 52                 | 39              |
| Family history of cardiac diseases    | 6                  | 38                  | 38                 | 19              |
| Family history of asthma              | 13                 | 13                  | 67                 | 7               |
| Thyroid                               | 0                  | 14                  | 64                 | 21              |
| Self-medication                       | 0                  | 29                  | 50                 | 21              |
| Jewelry allergies                     | 0                  | 33                  | 67                 | 0               |
| Past skin infection                   | 8                  | 25                  | 50                 | 17              |
| Family history of thyroid disease     | 18                 | 55                  | 9                  | 18              |
| Cardiac treatment                     | 0                  | 20                  | 40                 | 40              |
| Stop breathing during sleep           | 0                  | 33                  | 33                 | 33              |
| Oral infection                        | 0                  | 11                  | 67                 | 22              |
| Kidney disorder                       | 13                 | 13                  | 50                 | 25              |
| Skin problem                          | 0                  | 0                   | 50                 | 50              |
| Skin infection                        | 0                  | 29                  | 57                 | 14              |
| Food allergies                        | 0                  | 29                  | 57                 | 14              |
| Hyperactivity                         | 14                 | 29                  | 57                 | 0               |
| Cardiovascular                        | 0                  | 33                  | 67                 | 0               |
| Migraine                              | 17                 | 83                  | 0                  | 0               |
| Low blood pressure                    | 17                 | 17                  | 67                 | 0               |
| Family history of stroke              | 20                 | 60                  | 20                 | 0               |
| Past ear infection                    | 0                  | 75                  | 0                  | 25              |
| Family history of eye disease         | 0                  | 75                  | 25                 | 0               |
| Heart attack                          | 0                  | 25                  | 25                 | 50              |
| Material allergies                    | 0                  | 75                  | 25                 | 0               |
| Anxiety                               | 0                  | 50                  | 50                 | 0               |
| Injury in past 6 months               | 25                 | 0                   | 75                 | 0               |
| Family history of depression          | 33                 | 67                  | 0                  | 0               |
| Coronary bypass surgery               | 0                  | 0                   | 33                 | 67              |
| Attention deficit disorder            | 0                  | 0                   | 100                | 0               |
| Drinking addiction                    | 0                  | 0                   | 67                 | 33              |
| Eye treatment                         | 0                  | 0                   | 0                  | 100             |
| Family history of skin disease        | 0                  | 50                  | 50                 | 0               |
| Memory loss                           | 0                  | 0                   | 50                 | 50              |
| Ear treatment                         | 0                  | 0                   | 100                | 0               |
| Lung diseases                         | 0                  | 0                   | 50                 | 50              |
| Family history of ear disease         | 0                  | 50                  | 0                  | 50              |
| Cancer                                | 0                  | 0                   | 100                | 0               |
| Sexually transmitted disease          | 0                  | 100                 | 0                  | 0               |
| Liver disease                         | 0                  | 0                   | 100                | 0               |
| Skin treatment                        | 0                  | 100                 | 0                  | 0               |
| Past gastric infection                | 0                  | 0                   | 100                | 0               |
| Depression                            | 0                  | 0                   | 0                  | 0               |
| Sleep disorder treatment              | 0                  | 0                   | 0                  | 0               |
| Heart murmur                          | 0                  | 0                   | 0                  | 0               |
| Past lung infection                   | 0                  | 0                   | 0                  | 0               |

Distribution of subjects, in percentages, who responded yes to a medical history question across age cohorts.

Age ranges in years for each age cohort are in parentheses.



Supplementary Table 4. Percentage of subjects in each age cohort who responded yes to a medical history question.

|                                       | Adolescent (18-19) | Young adult (20-39) | Middle age (40-64) | Old age (65-90) |
|---------------------------------------|--------------------|---------------------|--------------------|-----------------|
| Glasses                               | 43                 | 34                  | 62                 | 57              |
| Dental                                | 6                  | 18                  | 36                 | 33              |
| Swollen joints                        | 0                  | 9                   | 34                 | 54              |
| Hearing                               | 2                  | 5                   | 29                 | 51              |
| Family history of diabetes            | 26                 | 28                  | 18                 | 6               |
| Leg cramps                            | 0                  | 9                   | 23                 | 39              |
| Family history of high blood pressure | 22                 | 24                  | 14                 | 3               |
| Fatigue                               | 2                  | 11                  | 22                 | 20              |
| Acidity                               | 6                  | 14                  | 18                 | 15              |
| Tiredness                             | 3                  | 10                  | 20                 | 18              |
| Tobacco addiction                     | 0                  | 7                   | 14                 | 22              |
| Surgery                               | 6                  | 6                   | 10                 | 20              |
| Difficulty walking                    | 0                  | 1                   | 13                 | 27              |
| High blood pressure                   | 0                  | 3                   | 13                 | 17              |
| Diabetes                              | 0                  | 4                   | 13                 | 9               |
| Snore Loudly                          | 0                  | 7                   | 13                 | 3               |
| High blood pressure treatment         | 0                  | 1                   | 9                  | 13              |
| Environmental allergies               | 8                  | 8                   | 5                  | 2               |
| Sleepiness                            | 2                  | 1                   | 9                  | 8               |
| Medication allergies                  | 6                  | 3                   | 7                  | 4               |
| Asthma                                | 0                  | 1                   | 9                  | 8               |
| Smoking addiction                     | 0                  | 1                   | 6                  | 10              |
| Family history of cardiac diseases    | 2                  | 4                   | 3                  | 3               |
| Family history of asthma              | 3                  | 1                   | 5                  | 1               |
| Thyroid                               | 0                  | 1                   | 5                  | 3               |
| Self-medication                       | 0                  | 3                   | 4                  | 3               |
| Jewelry allergies                     | 0                  | 3                   | 4                  | 0               |
| Past skin infection                   | 2                  | 2                   | 3                  | 2               |
| Family history of thyroid disease     | 3                  | 4                   | 1                  | 2               |
| Cardiac treatment                     | 0                  | 1                   | 2                  | 4               |
| Stop breathing during sleep           | 0                  | 2                   | 2                  | 3               |
| Oral infection                        | 0                  | 1                   | 3                  | 2               |
| Kidney disorder                       | 2                  | 1                   | 2                  | 2               |
| Skin problem                          | 0                  | 0                   | 2                  | 4               |
| Skin infection                        | 0                  | 1                   | 2                  | 1               |
| Food allergies                        | 0                  | 1                   | 2                  | 1               |
| Hyperactivity                         | 2                  | 1                   | 2                  | 0               |
| Cardiovascular                        | 0                  | 1                   | 2                  | 0               |
| Migraine                              | 2                  | 3                   | 0                  | 0               |
| Low blood pressure                    | 2                  | 0.7                 | 2                  | 0               |
| Family history of stroke              | 2                  | 2                   | 1                  | 0               |
| Past ear infection                    | 0                  | 2                   | 0                  | 1               |
| Family history of eye disease         | 0                  | 2                   | 0.5                | 0               |
| Heart attack                          | 0                  | 0.7                 | 0.5                | 2               |
| Material allergies                    | 0                  | 2                   | 0.5                | 0               |
| Anxiety                               | 0                  | 1                   | 1                  | 0               |
| Injury in past 6 months               | 2                  | 0                   | 2                  | 0               |
| Family history of depression          | 2                  | 1                   | 0                  | 0               |
| Coronary bypass surgery               | 0                  | 0                   | 0.5                | 2               |
| Attention deficit disorder            | 0                  | 0                   | 2                  | 0               |
| Drinking addiction                    | 0                  | 0                   | 1                  | 1               |
| Eye treatment                         | 0                  | 0                   | 0                  | 2               |
| Family history of skin disease        | 0                  | 0.7                 | 0.5                | 0               |
| Memory loss                           | 0                  | 0                   | 0.5                | 1               |
| Ear treatment                         | 0                  | 0                   | 1                  | 0               |
| Lung diseases                         | 0                  | 0                   | 0.5                | 1               |
| Family history of ear disease         | 0                  | 0.7                 | 0                  | 1               |
| Cancer                                | 0                  | 0                   | 0.5                | 0               |
| Sexually transmitted disease          | 0                  | 0.7                 | 0                  | 0               |
| Liver disease                         | 0                  | 0                   | 0.5                | 0               |
| Skin treatment                        | 0                  | 0.7                 | 0                  | 0               |
| Past gastric infection                | 0                  | 0                   | 0.5                | 0               |
| Depression                            | 0                  | 0                   | 0                  | 0               |
| Sleep disorder treatment              | 0                  | 0                   | 0                  | 0               |
| Heart murmur                          | 0                  | 0                   | 0                  | 0               |
| Past lung infection                   | 0                  | 0                   | 0                  | 0               |

Age ranges in years for each age cohort are in parentheses.



**Supplementary Table 5. Numbers of subjects in each age cohort identified by vital sign tests.**

|          | Adolescent (18-19) |      |       | Young adult (20-39) |      |       | Middle age (40-64) |      |       | Old age (65-90) |      |       |
|----------|--------------------|------|-------|---------------------|------|-------|--------------------|------|-------|-----------------|------|-------|
|          | Female             | Male | Total | Female              | Male | Total | Female             | Male | Total | Female          | Male | Total |
| High BMI | 10                 | 11   | 21    | 15                  | 35   | 50    | 43                 | 57   | 100   | 7               | 18   | 25    |
| Low BMI  | 11                 | 6    | 17    | 19                  | 9    | 28    | 7                  | 13   | 20    | 5               | 19   | 24    |
| High BP  | 0                  | 1    | 1     | 4                   | 12   | 16    | 15                 | 30   | 45    | 7               | 19   | 26    |
| Low BP   | 1                  | 0    | 1     | 2                   | 0    | 2     | 0                  | 1    | 1     | 0               | 0    | 0     |

Age ranges in years for each age cohort are in parentheses.

**Supplementary Table 6. Percentages of subjects with each condition in our study and in each encompassing region from the National Family and Health Survey 4 (NFHS4).**

|                   | High BMI |       | Low BMI |       | High BP |       |
|-------------------|----------|-------|---------|-------|---------|-------|
|                   | Female   | Male  | Female  | Male  | Female  | Male  |
| Our study         | 39%      | 40%   | 22%     | 16%   | 15%     | 22%   |
| NFHS4 India       | 20.7%    | 18.6% | 22.9%   | 20.2% | 8.8%    | 13.6% |
| NFHS4 Maharashtra | 23.4%    | 23.8% | 23.5%   | 19.1% | 9.1%    | 15.9% |
| NFHS4 Nashik      | 22.9%    | 23.7% | 25.8%   | 16.8% | 5.7%    | 11%   |

**Supplementary Table 7. Statistically significant prevalence of clinical conditions identified by vital sign measurements across age cohorts.**

| Condition | More prevalent in | Than in     | p-value | More prevalent cohort           |               | Less prevalent cohort           |               |
|-----------|-------------------|-------------|---------|---------------------------------|---------------|---------------------------------|---------------|
|           |                   |             |         | No. with condition (percentage) | No. in cohort | No. with condition (percentage) | No. in cohort |
| High BMI  | Middle age        | Young adult | 0.0014  | 100 (60)                        | 168           | 50 (33)                         | 152           |
| High BMI  | Middle age        | Old age     | 0.0052  | 100 (60)                        | 168           | 25 (28)                         | 89            |
| High BP   | Young adult       | Adolescent  | 0.0147  | 16 (12)                         | 135           | 1 (2)                           | 65            |
| High BP   | Middle age        | Adolescent  | <0.0001 | 45 (26)                         | 172           | 1 (2)                           | 65            |
| High BP   | Middle age        | Young adult | 0.0023  | 45 (26)                         | 172           | 16 (11)                         | 152           |
| High BP   | Old age           | Adolescent  | <0.0001 | 26 (32)                         | 82            | 1 (2)                           | 65            |
| High BP   | Old age           | Young adult | 0.0006  | 52 (67)                         | 82            | 16 (11)                         | 152           |

Age ranges in years for each cohort: 18-19 for adolescents, 20-39 for young adults, 40-64 for middle age, and 65-90 for old age.

Supplementary Table 8. Number of subjects with a vital sign condition and responded yes to a medical history question.

| Condition | No. with condition | Glasses | Dental | Swollen joints | Hearing | FH diabetes | FH high BP | Tobacco | Difficulty walking | High BP | Diabetes | High BP Rx | Asthma | Smoking | FH cardiac | Cardiac Rx | Cardiovascular | Low BP | FH stroke | FH eye disease | Heart attack | Coronary bypass | Drinking | Eye treatment | Memory loss | Ear treatment | FH ear disease | Cancer |
|-----------|--------------------|---------|--------|----------------|---------|-------------|------------|---------|--------------------|---------|----------|------------|--------|---------|------------|------------|----------------|--------|-----------|----------------|--------------|-----------------|----------|---------------|-------------|---------------|----------------|--------|
| High BMI  | 196                | 115*    | 48     | 52             | 38      | 48*         | 41*        | 23      | 19                 | 26*     | 18       | 17         | 9      | 3**     | 5          | 5          | 1              | 1      | 1         | 3              | 2            | 1               | 1        | 0             | 2           | 2             | 1              | 0      |
| Low BMI   | 89                 | 39      | 21     | 23             | 25      | 11          | 10         | 16*     | 12                 | 4       | 6        | 4          | 4      | 9*      | 1          | 1          | 0              | 2      | 1         | 0              | 0            | 0               | 1        | 0             | 0           | 0             | 0              | 0      |
| High BP   | 88                 | 54      | 24     | 30*            | 25      | 19          | 11         | 11      | 14*                | 17*     | 15*      | 14*        | 2      | 4       | 4          | 4          | 3              | 0      | 0         | 1              | 2            | 1               | 0        | 1             | 1           | 1             | 1              | 0      |
| Low BP    | 4                  | 3       | 1      | 1              | 1       | 2           | 1          | 0       | 1                  | 0       | 0        | 0          | 0      | 1       | 0          | 0          | 0              | 0      | 0         | 0              | 0            | 0               | 0        | 0             | 0           | 0             | 0              | 0      |

Total populations reflect the number of subjects with the particular condition in that row. Multiple subjects were associated with more than one condition or questionnaire response.

\*  $p < 0.05$ , subjects are more likely to have responded yes to the column's question and have the vital sign abnormality.

\*\*  $p < 0.05$ , subjects are less likely to have responded yes to the column's question and have the vital sign abnormality.

Supplementary Table 9. Statistically significant correlations between vital sign conditions and self-reported medical history.

| Condition | Medical History    | <i>p</i> -value | Subjects with vital sign condition |                    | Subjects without vital sign condition |                       |
|-----------|--------------------|-----------------|------------------------------------|--------------------|---------------------------------------|-----------------------|
|           |                    |                 | No. responded yes (percentage)     | No. with condition | No. responded yes (percentage)        | No. without condition |
| High BMI  | Glasses            | 0.0024          | 115 (59)                           | 196                | 132 (44)                              | 298                   |
| High BMI  | FH diabetes        | 0.0384          | 48 (24)                            | 196                | 50 (17)                               | 298                   |
| High BMI  | FH High BP         | 0.0173          | 41 (21)                            | 196                | 38 (13)                               | 298                   |
| Low BMI   | Tobacco addiction  | 0.0406          | 16 (18)                            | 89                 | 40 (10)                               | 405                   |
| High BMI  | High BP            | 0.0091          | 26 (13)                            | 196                | 18 (6)                                | 298                   |
| Low BMI   | Smoking            | 0.0122          | 9 (10)                             | 89                 | 14 (3)                                | 405                   |
| High BMI  | Smoking            | 0.0077          | 3 (2)                              | 196                | 20 (7)                                | 298                   |
| High BP   | Glasses            | 0.0251          | 60 (68)                            | 88                 | 179 (49)                              | 367                   |
| High BP   | Swollen joints     | 0.0425          | 30 (34)                            | 88                 | 89 (24)                               | 367                   |
| High BP   | Difficulty walking | 0.0483          | 14 (16)                            | 88                 | 33 (9)                                | 367                   |
| High BP   | High BP            | 0.0006          | 17 (19)                            | 88                 | 24 (7)                                | 367                   |
| High BP   | Diabetes           | 0.0004          | 15 (17)                            | 88                 | 22 (6)                                | 367                   |
| High BP   | High BP Rx         | 0.0002          | 14 (16)                            | 88                 | 17 (5)                                | 367                   |

**Supplementary Table 10. Numbers of subjects in each age cohort identified by technology-enabled screenings.**

|                         | Adolescent (18-19) |      |       | Young adult (20-39) |      |       | Middle age (40-64) |      |       | Old age (65-90) |      |       |
|-------------------------|--------------------|------|-------|---------------------|------|-------|--------------------|------|-------|-----------------|------|-------|
|                         | Female             | Male | Total | Female              | Male | Total | Female             | Male | Total | Female          | Male | Total |
| Blood oxygen saturation | 0                  | 2    | 2     | 2                   | 2    | 4     | 3                  | 5    | 8     | 0               | 5    | 5     |
| Single-lead ECG         | 0                  | 1    | 1     | 0                   | 0    | 0     | 0                  | 0    | 0     | 0               | 0    | 0     |
| Oral                    | 17                 | 5    | 22    | 22                  | 30   | 52    | 55                 | 65   | 120   | 15              | 51   | 66    |
| Retinal                 | 2                  | 1    | 3     | 2                   | 7    | 9     | 9                  | 8    | 17    | 4               | 9    | 13    |
| Tympanic membrane       | 0                  | 0    | 0     | 1                   | 2    | 3     | 4                  | 0    | 4     | 0               | 2    | 2     |
| Hand tremor test        | 0                  | 0    | 0     | 0                   | 0    | 0     | 0                  | 0    | 0     | 0               | 0    | 0     |
| Finger-nose test        | 0                  | 0    | 0     | 0                   | 0    | 0     | 0                  | 2    | 2     | 0               | 1    | 1     |
| Finger-count test       | 0                  | 0    | 0     | 0                   | 0    | 0     | 0                  | 0    | 0     | 0               | 0    | 0     |
| Gait test               | 0                  | 0    | 0     | 0                   | 1    | 1     | 0                  | 1    | 1     | 1               | 2    | 3     |

Age ranges in years for each age cohort are in parentheses.

**Supplementary Table 11. Distribution of unhealthy subjects by clinical condition identified in each technology-enabled screening test.**

| Test              | Condition             | No. with condition (percent) | No. screened by test |
|-------------------|-----------------------|------------------------------|----------------------|
| Oral              | Carious               | 156 (38)                     | 411                  |
| Oral              | Missing tooth         | 115 (28)                     | 411                  |
| Oral              | Edentulous            | 35 (9)                       | 411                  |
| Oral              | Periodontal disease   | 61 (15)                      | 411                  |
| Retinal           | Width of rim 0.01-0.1 | 9 (2)                        | 404                  |
| Tympanic membrane | Perforated eardrum    | 25 (8)                       | 324                  |
| Tympanic membrane | Effusion              | 20 (6)                       | 324                  |
| Finger-nose       | Abnormal              | 3 (1)                        | 305                  |
| Gait              | Abnormal              | 5 (2)                        | 214                  |

**Supplementary Table 12. Number of subjects identified with clinical conditions in two technology-enabled screening tests.**

|                   | Tympanic membrane | Retinal | Oral | Finger-nose | Gait |
|-------------------|-------------------|---------|------|-------------|------|
| Low blood oxygen  | 1                 | 1       | 13   | 0           | 1    |
| Tympanic membrane |                   | 0       | 26   | 2           | 2    |
| Retinal           |                   |         | 8    | 0           | 0    |
| Oral              |                   |         |      | 2           | 4    |
| Finger-nose       |                   |         |      |             | 0    |

**Supplementary Table 13. Percentages of subjects identified with a clinical condition by a technology-enabled screening test and a vital sign abnormality.**

| Abnormality       | High BMI | Low BMI | High BP | Low BP |
|-------------------|----------|---------|---------|--------|
| Low blood oxygen  | 21       | 42*     | 11      | 5      |
| Tympanic Membrane | 31       | 31      | 32      | 0      |
| Retinal           | 44       | 11      | 11      | 0      |
| Oral              | 40       | 17      | 21      | 1      |
| Finger-nose       | 0        | 33      | 0       | 0      |
| Gait              | 20       | 40      | 20      | 0      |

\*  $p < 0.05$ , subjects are more likely to have the vital sign abnormality if they have the technology-enabled screening condition.

**Supplementary Table 14. Statistically significant correlations between conditions identified by a technology-enabled screening test and self-reported medical history.**

| Abnormality       | Medical History    | <i>p</i> -value | Subjects with condition        |                    | Subjects without condition     |                       |
|-------------------|--------------------|-----------------|--------------------------------|--------------------|--------------------------------|-----------------------|
|                   |                    |                 | No. responded yes (percentage) | No. with condition | No. responded yes (percentage) | No. without condition |
| Low blood oxygen  | Smoking            | 0.0087          | 4 (21)                         | 19                 | 15 (3)                         | 436                   |
| Tympanic Membrane | Hearing difficulty | 0.0053          | 17 (40)                        | 42                 | 65 (23)                        | 282                   |
| Retinal           | Hearing difficulty | 0.0500          | 4 (44)                         | 9                  | 65 (16)                        | 395                   |
| Retinal           | Difficulty walking | 0.0298          | 3 (33)                         | 9                  | 30 (8)                         | 395                   |
| Oral              | Glasses            | 0.0195          | 145 (57)                       | 255                | 70 (45)                        | 156                   |
| Oral              | Dental problems    | 0.0043          | 82 (32)                        | 255                | 30 (19)                        | 156                   |
| Oral              | Swollen joints     | 0.0002          | 85 (33)                        | 255                | 26 (17)                        | 156                   |
| Oral              | Hearing difficulty | 0.0017          | 72 (28)                        | 255                | 23 (15)                        | 156                   |
| Oral              | FH high BP         | 0.0172*         | 31 (12)                        | 255                | 33 (21)                        | 156                   |
| Oral              | Difficulty walking | 0.0089          | 36 (14)                        | 255                | 9 (6)                          | 156                   |
| Oral              | High BP            | 0.0339          | 30 (12)                        | 255                | 8 (5)                          | 156                   |
| Oral              | High BP Rx         | 0.0490          | 24 (9)                         | 255                | 6 (4)                          | 156                   |
| Oral              | Cardiac Rx         | 0.0267          | 8 (3)                          | 255                | 0 (0)                          | 156                   |
| Finger-nose       | Difficulty walking | 0.0009          | 3 (100)                        | 3                  | 27 (9)                         | 302                   |
| Finger-nose       | Swollen joints     | 0.0159          | 3 (100)                        | 3                  | 80 (26)                        | 302                   |
| Gait              | Teeth problems     | 0.0179          | 4 (80)                         | 5                  | 53 (25)                        | 209                   |
| Gait              | Swollen joints     | 0.0159          | 4 (80)                         | 5                  | 45 (22)                        | 209                   |

**Supplementary Table 15. Age cohort and gender of subjects identified with any vital sign condition or any technology-enabled screening abnormality.**

|                                          | Adolescent (18-19) |      | Young adult (20-39) |      | Middle age (40-64) |      | Old age (65-90) |      | Total (n=111) |
|------------------------------------------|--------------------|------|---------------------|------|--------------------|------|-----------------|------|---------------|
|                                          | Female             | Male | Female              | Male | Female             | Male | Female          | Male |               |
| Vital sign condition                     | 10                 | 0    | 8                   | 19   | 11                 | 21   | 2               | 8    | 79            |
| Technology-enabled screening abnormality | 9                  | 0    | 8                   | 11   | 14                 | 18   | 2               | 8    | 70            |
| Total in age cohort                      | 19                 | 0    | 16                  | 23   | 16                 | 26   | 2               | 9    |               |

1  
2 **Table 16. Detailed results of technology-enabled screenings and vital sign measurements of the 111 subjects who completed all tests.**

| 3<br>4<br>5<br>6<br>7<br>8<br>9<br>10<br>11<br>12<br>13<br>14 | der | Questionnaire | High BMI | Low BMI | High BP | Low BP | ECG | Hypoxemia | TM | Retinal | Oral | Finger-nose | Gait |
|---------------------------------------------------------------|-----|---------------|----------|---------|---------|--------|-----|-----------|----|---------|------|-------------|------|
| 15                                                            |     |               | x        |         |         |        |     |           |    |         |      |             |      |
| 16                                                            |     |               | x        |         |         |        |     |           |    |         |      |             |      |
| 17                                                            |     |               |          | x       |         |        |     |           |    |         |      |             |      |
| 18                                                            |     |               | x        |         |         |        |     |           |    |         |      |             |      |
| 19                                                            |     |               | x        |         |         |        |     |           |    |         |      |             |      |
| 20                                                            |     |               | x        |         |         |        |     |           |    |         |      |             |      |
| 21                                                            |     |               |          |         | x       |        |     |           |    |         |      |             |      |
| 22                                                            |     |               |          | x       |         |        |     |           |    |         |      |             |      |
| 23                                                            |     |               | x        |         |         |        |     |           |    |         |      |             |      |
| 24                                                            | x   |               | x        |         |         |        |     |           |    |         |      |             |      |
| 25                                                            | x   |               | x        |         |         |        |     |           |    |         |      |             |      |
| 26                                                            | x   |               | x        |         |         |        |     |           |    |         |      |             |      |
| 27                                                            | x   |               |          |         |         |        |     |           |    |         |      |             |      |
| 28                                                            | x   |               |          | x       |         |        |     |           |    |         |      |             |      |
| 29                                                            |     |               | x        |         |         |        |     |           |    |         |      |             |      |
| 30                                                            |     |               | x        |         |         |        |     |           |    |         |      |             |      |
| 31                                                            | x   |               | x        |         |         |        |     |           |    |         |      |             |      |
| 32                                                            | x   |               | x        |         |         |        |     |           |    |         |      |             |      |
| 33                                                            | x   |               | x        |         |         |        |     |           |    |         |      |             |      |
| 34                                                            | x   |               |          | x       |         |        |     |           |    |         |      |             |      |
| 35                                                            | x   |               | x        |         |         |        |     |           |    |         |      |             |      |
| 36                                                            | x   |               | x        |         |         |        |     |           |    |         |      |             |      |
| 37                                                            |     |               | x        |         |         |        |     |           |    |         |      |             |      |
| 38                                                            | x   |               |          | x       |         |        |     |           |    |         |      |             |      |
| 39                                                            | x   |               | x        |         |         |        |     |           |    |         |      |             |      |
| 40                                                            | x   |               | x        |         |         |        |     |           |    |         |      |             |      |
| 41                                                            | x   |               | x        |         |         |        |     |           |    |         |      |             |      |
| 42                                                            | x   |               | x        |         |         |        |     |           |    |         |      |             |      |
| 43                                                            | x   |               | x        |         |         |        |     |           |    |         |      |             |      |
| 44                                                            | x   |               | x        |         |         |        |     |           |    |         |      |             |      |
| 45                                                            |     |               |          |         |         |        |     |           |    |         |      | x           |      |
| 46                                                            |     |               |          |         |         |        |     |           |    |         |      | x           |      |
| 47                                                            |     |               |          |         |         |        |     |           |    |         |      |             |      |
| 48                                                            |     |               |          |         |         |        |     |           |    |         |      | x           |      |
| 49                                                            |     |               |          |         |         |        |     |           |    |         |      | x           |      |
| 50                                                            |     |               |          |         |         |        |     |           |    |         |      | x           |      |
| 51                                                            | x   |               |          |         |         |        |     |           |    |         |      | x           |      |
| 52                                                            | x   |               |          |         |         |        |     |           |    |         |      | x           |      |
| 53                                                            | x   |               |          |         |         |        |     |           |    |         |      | x           |      |
| 54                                                            |     |               |          |         |         |        |     |           |    |         |      | x           |      |
| 55                                                            | x   |               |          |         |         |        |     |           |    |         |      | x           |      |
| 56                                                            | x   |               |          |         |         |        |     |           |    |         |      | x           |      |
| 57                                                            | x   |               |          |         |         |        |     |           |    |         |      | x           |      |
| 58                                                            | x   |               |          |         |         |        |     |           |    |         |      | x           |      |
| 59                                                            | x   |               |          |         |         |        |     |           |    |         |      | x           |      |
| 60                                                            | x   |               |          |         |         |        |     |           |    |         |      | x           |      |
|                                                               | x   |               |          |         |         |        |     |           |    |         |      | x           |      |

1  
2 **Table 17. Detailed results of technology-enabled screenings and vital sign measurements of the 111 subjects who completed all tests.**

| 3<br>4<br>5<br>6<br>7<br>8<br>9<br>10<br>11<br>12<br>13<br>14<br>15<br>16<br>17<br>18<br>19<br>20<br>21<br>22<br>23<br>24<br>25<br>26<br>27<br>28<br>29<br>30<br>31<br>32<br>33<br>34<br>35<br>36<br>37<br>38<br>39<br>40<br>41<br>42<br>43<br>44<br>45<br>46<br>47<br>48<br>49<br>50<br>51<br>52<br>53<br>54 | Questionnaire | High BMI | Low BMI | High BP | Low BP | ECG | Hypoxemia | TM | Retinal | Oral | Finger-nose | Gait |
|---------------------------------------------------------------------------------------------------------------------------------------------------------------------------------------------------------------------------------------------------------------------------------------------------------------|---------------|----------|---------|---------|--------|-----|-----------|----|---------|------|-------------|------|
| 5                                                                                                                                                                                                                                                                                                             |               |          | x       |         |        |     |           |    |         | x    |             |      |
| 6                                                                                                                                                                                                                                                                                                             |               |          | x       |         |        |     |           |    |         | x    |             |      |
| 7                                                                                                                                                                                                                                                                                                             |               | x        |         | x       |        |     |           | x  |         |      |             |      |
| 8                                                                                                                                                                                                                                                                                                             | x             |          |         | x       |        |     |           |    |         | x    |             |      |
| 9                                                                                                                                                                                                                                                                                                             | x             | x        |         |         |        |     |           | x  |         |      |             |      |
| 10                                                                                                                                                                                                                                                                                                            | x             | x        |         |         |        |     | x         |    |         |      |             |      |
| 11                                                                                                                                                                                                                                                                                                            |               |          | x       |         |        |     |           | x  |         | x    |             |      |
| 12                                                                                                                                                                                                                                                                                                            | x             | x        |         |         |        |     |           |    |         | x    |             |      |
| 13                                                                                                                                                                                                                                                                                                            | x             | x        |         |         |        |     |           |    |         | x    |             |      |
| 14                                                                                                                                                                                                                                                                                                            |               |          | x       |         |        |     |           | x  |         | x    |             |      |
| 15                                                                                                                                                                                                                                                                                                            | x             | x        |         |         |        |     |           |    |         | x    |             |      |
| 16                                                                                                                                                                                                                                                                                                            |               |          | x       |         |        |     |           | x  |         | x    |             |      |
| 17                                                                                                                                                                                                                                                                                                            | x             |          |         | x       |        |     |           |    |         | x    |             |      |
| 18                                                                                                                                                                                                                                                                                                            | x             | x        |         |         |        |     |           |    |         | x    |             |      |
| 19                                                                                                                                                                                                                                                                                                            | x             |          |         | x       |        |     |           |    |         | x    |             |      |
| 20                                                                                                                                                                                                                                                                                                            | x             |          |         | x       |        |     |           |    |         | x    |             |      |
| 21                                                                                                                                                                                                                                                                                                            | x             |          |         | x       |        |     |           |    |         | x    |             |      |
| 22                                                                                                                                                                                                                                                                                                            | x             | x        |         |         |        |     |           |    |         | x    |             |      |
| 23                                                                                                                                                                                                                                                                                                            | x             | x        |         |         |        |     |           |    |         | x    |             |      |
| 24                                                                                                                                                                                                                                                                                                            | x             |          | x       |         |        |     |           |    |         | x    |             |      |
| 25                                                                                                                                                                                                                                                                                                            | x             |          |         | x       |        |     |           |    |         | x    |             |      |
| 26                                                                                                                                                                                                                                                                                                            | x             | x        |         |         |        |     |           |    |         | x    |             |      |
| 27                                                                                                                                                                                                                                                                                                            | x             | x        |         |         |        |     |           |    |         | x    |             |      |
| 28                                                                                                                                                                                                                                                                                                            | x             | x        |         |         |        |     |           |    |         | x    |             |      |
| 29                                                                                                                                                                                                                                                                                                            | x             |          |         | x       |        |     |           |    |         | x    |             |      |
| 30                                                                                                                                                                                                                                                                                                            | x             |          | x       |         |        |     |           | x  |         |      |             |      |
| 31                                                                                                                                                                                                                                                                                                            | x             | x        |         |         |        |     |           | x  |         |      |             |      |
| 32                                                                                                                                                                                                                                                                                                            | x             | x        |         |         |        |     |           |    |         | x    |             |      |
| 33                                                                                                                                                                                                                                                                                                            | x             |          | x       |         |        |     |           |    |         | x    |             |      |
| 34                                                                                                                                                                                                                                                                                                            | x             | x        |         |         |        |     |           |    |         | x    |             |      |
| 35                                                                                                                                                                                                                                                                                                            | x             |          | x       |         |        |     |           |    |         | x    |             |      |
| 36                                                                                                                                                                                                                                                                                                            | x             |          | x       |         |        |     |           |    |         | x    |             |      |
| 37                                                                                                                                                                                                                                                                                                            | x             | x        |         | x       |        |     |           |    |         | x    |             |      |
| 38                                                                                                                                                                                                                                                                                                            | x             | x        |         |         |        |     |           | x  |         | x    |             |      |
| 39                                                                                                                                                                                                                                                                                                            | x             |          |         | x       |        |     |           | x  |         | x    |             |      |
| 40                                                                                                                                                                                                                                                                                                            | x             | x        |         |         |        |     |           | x  |         | x    |             |      |
| 41                                                                                                                                                                                                                                                                                                            | x             | x        |         |         |        |     |           |    | x       | x    |             |      |
| 42                                                                                                                                                                                                                                                                                                            | x             | x        |         |         |        |     |           |    | x       | x    |             |      |
| 43                                                                                                                                                                                                                                                                                                            | x             | x        |         | x       |        |     |           |    |         | x    |             |      |
| 44                                                                                                                                                                                                                                                                                                            | x             | x        |         |         |        |     |           | x  |         | x    |             |      |
| 45                                                                                                                                                                                                                                                                                                            | x             | x        |         |         |        |     |           |    | x       | x    |             |      |
| 46                                                                                                                                                                                                                                                                                                            | x             | x        |         | x       |        |     |           |    |         | x    |             |      |
| 47                                                                                                                                                                                                                                                                                                            | x             | x        |         | x       |        |     |           |    |         | x    |             |      |
| 48                                                                                                                                                                                                                                                                                                            | x             |          | x       | x       |        |     |           |    |         | x    |             |      |
| 49                                                                                                                                                                                                                                                                                                            | x             | x        |         | x       |        |     |           |    |         | x    |             |      |
| 50                                                                                                                                                                                                                                                                                                            | x             |          | x       |         |        |     |           |    |         | x    |             | x    |
| 51                                                                                                                                                                                                                                                                                                            | x             |          | x       |         |        |     | x         |    |         | x    |             | x    |
| 52                                                                                                                                                                                                                                                                                                            | x             |          | x       | x       |        |     |           | x  |         | x    |             |      |
| 53                                                                                                                                                                                                                                                                                                            | x             | x        |         | x       |        |     |           | x  |         | x    |             | x    |

55 that the subject was marked as abnormal in that row's test.  
56 membrane

57  
58  
59  
60

1  
2  
3  
4  
5  
6  
7  
8  
9  
10  
11  
12  
13  
14  
15  
16  
17  
18  
19  
20  
21  
22  
23  
24  
25  
26  
27  
28  
29  
30  
31  
32  
33  
34  
35  
36  
37  
38  
39  
40  
41  
42  
43  
44  
45  
46  
47  
48  
49  
50  
51  
52  
53  
54  
55  
56  
57  
58  
59  
60

For peer review only

# BMJ Open

## Evaluation of technology-enabled examinations of cardiac rhythm, optic nerve, oral health, tympanic membrane, gait and coordination jointly with routine health screenings: An observational study

|                                 |                                                                                                                                                                                                                                                                                                                                                                                                                                                                                                                                                                                                         |
|---------------------------------|---------------------------------------------------------------------------------------------------------------------------------------------------------------------------------------------------------------------------------------------------------------------------------------------------------------------------------------------------------------------------------------------------------------------------------------------------------------------------------------------------------------------------------------------------------------------------------------------------------|
| Journal:                        | <i>BMJ Open</i>                                                                                                                                                                                                                                                                                                                                                                                                                                                                                                                                                                                         |
| Manuscript ID                   | bmjopen-2017-018774.R1                                                                                                                                                                                                                                                                                                                                                                                                                                                                                                                                                                                  |
| Article Type:                   | Research                                                                                                                                                                                                                                                                                                                                                                                                                                                                                                                                                                                                |
| Date Submitted by the Author:   | 01-Dec-2017                                                                                                                                                                                                                                                                                                                                                                                                                                                                                                                                                                                             |
| Complete List of Authors:       | Shah, Pratik; Massachusetts Institute of Technology, Media Lab<br>Yauney, Gregory; Massachusetts Institute of Technology, Media Arts and Sciences<br>Gupta, Otkrist; Massachusetts Institute of Technology, Media Arts and Sciences<br>Patalano, Vincent; Harvard Medical School, Ophthalmology; Cambridge Health Alliance<br>Mohit, Mrinal; Massachusetts Institute of Technology, Media Arts and Sciences<br>Merchant, Rikin; Karmaveer Bhausahab Hiray Dental College and Hospital, Global Health<br>Subramanian, S V; Harvard School of Public Health, Department of Society, Human Development and |
| <b>Primary Subject Heading</b>: | Diagnostics                                                                                                                                                                                                                                                                                                                                                                                                                                                                                                                                                                                             |
| Secondary Subject Heading:      | Diagnostics, Global health                                                                                                                                                                                                                                                                                                                                                                                                                                                                                                                                                                              |
| Keywords:                       | PRIMARY CARE, Glaucoma < OPHTHALMOLOGY, Telemedicine < BIOTECHNOLOGY & BIOINFORMATICS                                                                                                                                                                                                                                                                                                                                                                                                                                                                                                                   |
|                                 |                                                                                                                                                                                                                                                                                                                                                                                                                                                                                                                                                                                                         |

SCHOLARONE™  
Manuscripts



1  
2 1 Evaluation of technology-enabled examinations of cardiac rhythm, optic nerve, oral health, tympanic membrane,  
3  
4 2 gait and coordination jointly with routine health screenings: An observational study  
5  
6 3

7 4 Pratik Shah<sup>1\*</sup> Ph.D., Gregory Yaune<sup>1\*</sup>, Otkrist Gupta<sup>1</sup>, Vincent Patalano II<sup>2,3</sup> M.D., Mrinal Mohit<sup>1</sup>, Rikin  
8  
9 5 Merchant<sup>4</sup> BDS, S. V. Subramanian<sup>5</sup> Ph.D.  
10  
11 6

12  
13 7 <sup>1</sup> Massachusetts Institute of Technology, Cambridge, Massachusetts, United States of America

14  
15 8 <sup>2</sup> Cambridge Health Alliance, Department of Ophthalmology, Cambridge, Massachusetts, United States of  
16 9 America

17  
18 10 <sup>3</sup> Harvard Medical School, Department of Ophthalmology, Boston, Massachusetts, United States of America

19  
20 11 <sup>4</sup> Karmaveer Bhausaeheb Hiray Dental College and Hospital, Department of Prosthodontics, Nashik, India

21  
22 12 <sup>5</sup> Harvard T.H. Chan School of Public Health, Department of Social and Behavioral Sciences, Boston,  
23 13 Massachusetts, United States of America  
24  
25 14  
26 15

27 16 <sup>¶</sup> Corresponding author

28  
29 17 E-mail: pratiks@mit.edu

30  
31 18 \*These authors contributed equally to this work.  
32  
33 19  
34 20  
35  
36  
37  
38  
39  
40  
41  
42  
43  
44  
45  
46  
47  
48  
49  
50  
51  
52  
53  
54  
55  
56  
57  
58  
59  
60

1  
2 21 ABSTRACT

3  
4 22 **Objectives:** Technology-enabled non-invasive diagnostic screening (TES) using smartphones and other point-of-  
5  
6 23 care medical devices was evaluated in conjunction with conventional routine health screenings for the primary  
7  
8 24 care screening of patients.

9  
10 25 **Design:** Dental conditions, cardiac ECG arrhythmias, tympanic membrane disorders, blood oxygenation levels,  
11  
12 26 optic nerve disorders, and neurological fitness were evaluated using FDA-approved advanced smartphone  
13  
14 27 powered technologies. Routine health screenings were also conducted. A novel remote web platform was  
15  
16 28 developed to allow expert physicians to examine TES data and compare efficacy with routine health screenings.

17 29 **Setting:** The study was conducted at a primary care center during the 2015 Kumbh Mela in Maharashtra, India.

18  
19 30 **Participants:** 455 consenting 18 to 90 years adults attending the 2015 Kumbh Mela were tested.

20  
21 31 **Results:** TES and routine health screenings identified unique clinical conditions in distinct patients. Intraoral  
22  
23 32 fluorescent imaging classified 63.3% of the population with dental caries and periodontal diseases. An association  
24  
25 33 between poor oral health and cardiovascular illnesses was also identified. Tympanic membrane imaging detected  
26  
27 34 eardrum abnormalities in 13.0% of the population, several with a medical history of hearing difficulties. Gait and  
28  
29 35 coordination issues were discovered in eight subjects and one subject had arrhythmia. Cross-correlations were  
30  
31 36 observed between low oxygen saturation and low BMI with smokers ( $p = 0.0087$  and  $p = 0.0122$ , respectively),  
32  
33 37 and association of high BMI with elevated blood pressure in middle-aged subjects were found.

34 38 **Conclusions:** TES synergistically identified clinically significant abnormalities in several subjects who otherwise  
35  
36 39 presented as normal in routine health screenings. Physicians validated TES findings and utilized routine health  
37  
38 40 screening data and medical history responses for comprehensive diagnoses for at-risk patients. TES identified  
39  
40 41 high prevalence of oral diseases, hypertension, obesity and ophthalmic conditions among the middle-aged and  
41  
42 42 elderly Indian population, calling for public health interventions.

43  
44 43  
45  
46 44 **Ethics approval:** MGVBHDC/15-16/571 protocol was approved for clinical work, and the data was transferred  
47  
48 45 and analyzed according to MIT COUHES protocol 1512338971  
49  
50 46

1  
2 47 Strengths and limitations of this study:

- 3  
4 48 • This is one of the first studies to investigate using technology-enabled screenings to augment routine  
5  
6 49 health examinations  
7  
8 50 • A remote examination platform was developed to facilitate diagnoses of health conditions by multiple  
9  
10 51 physicians.  
11  
12 52 • The overall study size is large, but some organ-specific tests will benefit from larger studies.  
13  
14 53 • Sample sizes for each test were different with respect to number of subjects and gender distribution.  
15  
16 54 • The study is cross-sectional.  
17  
18  
19  
20  
21  
22  
23  
24  
25  
26  
27  
28  
29  
30  
31  
32  
33  
34  
35  
36  
37  
38  
39  
40  
41  
42  
43  
44  
45  
46  
47  
48  
49  
50  
51  
52  
53  
54  
55  
56  
57  
58  
59  
60

## INTRODUCTION

Providing good healthcare in low and middle-income countries (LMIC) paradoxically requires expensive equipment for health monitoring and assessment which may not be easily available because of resource-limitations[1]. Cardiovascular diseases, preventable blindness, oral cancer and treatable neurological conditions constitute more than half of the disease burden in LMIC and result in significantly morbidity and mortality[2, 3]. India, with a population in excess of 1.2 billion individuals, is one of the largest countries in the world[4]. India has significant disparity in access to basic healthcare and diagnostic screenings due to its geographically fragmented medical infrastructure[5]. Consequently, significant portions of the population may exist either as undiagnosed, diagnosed but unaware or misdiagnosed for several high-risk diseases at the primary care level.

Inexpensive device-based imaging and first-level analysis (e.g., smartphones capable of pulse oximetry, blood pressure, ECG recording and analysis or image segmentation) either operated by human experts, by operators with basic training using algorithms or clinical decision support systems are examples of affordable and potentially scalable technology-enabled screening[6, 7]. Previous reports from our group have demonstrated the utility of smartphones, modular devices and imaging technologies for sleep apnea[8] and refractometry screenings[9], at-home monitoring of diabetic retinopathy[10] and detecting melanomas[11]. Using smartphones with low-cost adapters, other researchers have also performed oral and cervical cancer[12], diabetic retinopathy [13], and malaria[14] assessments. Mobile smartphones equipped with imaging adapters, high-resolution cameras, light emitting diodes, fast processors and lightweight apps can thus be used for targeted diagnostic screenings at modest expense[15, 16].

The majority of previous studies using newer TES approaches have been performed in silos concentrating on individual devices or specific anatomical sites, often precluding more comprehensive assessment of patient health[17-23]. Interpretation of TES data has also been limited by risk of bias, differences between study groups and lack of comparison to established routine health screenings that are otherwise commonly deployed in primary care screenings. Due to these reasons, a lack of consensus exists about the usefulness of TES in augmenting primary health screenings in LMIC. Therefore, there is a pressing need for cost-effective, reliable screening protocols and deployable technologies to empower LMIC medical professionals and healthcare providers to identify patients and add them to the continuum of care.

The 2015 Kumbh Mela mass gathering[24] presented a unique opportunity for deployment and side-by-side evaluation of TES and routine health screenings. Multiple TES devices and methods and a remote clinical examination system to facilitate examination of findings were utilized to evaluate their collective use for

1  
2 85 comprehensive diagnoses of consenting adults. This study assesses whether low-cost, portable and non-invasive  
3  
4 86 examinations using TES can augment conventional routine health screenings by detecting additional anatomical,  
5  
6 87 structural or biomarker-driven disease pathologies.  
7  
8  
9  
10  
11  
12  
13  
14  
15  
16  
17  
18  
19  
20  
21  
22  
23  
24  
25  
26  
27  
28  
29  
30  
31  
32  
33  
34  
35  
36  
37  
38  
39  
40  
41  
42  
43  
44  
45  
46  
47  
48  
49  
50  
51  
52  
53  
54  
55  
56  
57  
58  
59  
60

For peer review only

## METHODS

**Study design:** 494 consenting adults between the ages of 18 and 90 years were screened by multiple tests in the order outlined in **Fig 1** at the Mahatma Gandhi Vidyamandir Karmaveer Bhausaheb Hiray Dental College & Hospital (MGVKBHDC) in Nashik, India, during the 2015 Sinhast Kumbh Mela (14 July-25 September). MGVKBHDC/15-16/571 protocol was approved for clinical work, and the data was transferred and analyzed according to MIT COUHES protocol 1512338971. **Table 1** shows the number of subjects who completed each test. Subjects could exit the study at their convenience, and the study design allowed for different numbers of subjects for each test (**Table 1**). Inclusion criteria, ethical consideration, and consent procedure are described in the supplementary appendix.

**Medical questionnaire and routine health screenings:** A designated physician administered a medical questionnaire, where subjects provided verbal answers and the physician was responsible for entering their answers into a computerized interface. The detailed questionnaire included geographic and demographic questions as well as questions about past medical history and current illnesses but did not capture data from past healthcare records. Height, weight, systolic and diastolic blood pressure, resting heart rate, and temperature were also each measured, separately by a different physician.

**Technology-enabled screening:** FDA-approved devices were used to image patients, CellScope Oto (CellScope Inc. USA) for the tympanic membrane, D-EYE Direct Ophthalmoscopy Adapter (D-EYE Srl, USA) for the optic nerve head, and SOPROCARE (SOPRO Acteon Imaging, France) for dental health. Microsoft Kinect (Microsoft Corporation, USA) was used to record subjects performing gait and coordination tests (**Supplementary Fig 1**). AliveCor Mobile ECG (AliveCor Inc, USA) was used to capture and analyze a 30-second rhythm strip. A CMS 50-DL Pulse Oximeter (Contec Medical Systems, USA) was used to measure blood oxygen saturation levels of hemoglobin. All devices and clinical evaluations have been previously described elsewhere [17-20, 23, 25-29]. The supplementary appendix details specific procedures for each device and the principles by which each operates.

**Data analyses:** Expert physicians conducted diagnostic feature annotation of de-identified images and videos collected by TES via a web-based examination portal in order to maximize time in the field for screening additional subjects (**Supplementary Methods**). This password-protected secure interface displayed an image or video for one patient at a time for a given examination. Physicians were able to mark specific features in the videos by drawing boxes around them that paused that specific frame, assign an overall score of 1 (best) to 5 (worst) for the entire video, and to write clinical features that were present for specific frames or the entire video

1  
2 118 **(Supplementary Fig 2)**. A panel of at least three physicians for each type of examination was assembled who  
3  
4 119 remotely and independently annotated the data facilitated by the web interface. The majority ratings for each  
5  
6 120 subject were then calculated for all TES tests. For subjects with no majority rating, the lesser of the tied ratings  
7  
8 121 was chosen to not overstate the prevalence of diagnosed illnesses. On average, each physician spent tens of  
9  
10 122 seconds to approximately a minute annotating each per video. Results from each test were analyzed for cross-  
11  
12 123 correlations with medical questionnaire responses, age and sex. Analyses of results from specific tests include  
13  
14 124 data from all subjects who completed that test.  
15  
16  
17  
18  
19  
20  
21  
22  
23  
24  
25  
26  
27  
28  
29  
30  
31  
32  
33  
34  
35  
36  
37  
38  
39  
40  
41  
42  
43  
44  
45  
46  
47  
48  
49  
50  
51  
52  
53  
54  
55  
56  
57  
58  
59  
60

## RESULTS

**Medical history and routine health screenings:** Results of routine health screenings are shown in **Table 1**, with gender and age range breakdowns in **Supplementary Table 1**. Medical questionnaire responses are shown in **Supplementary Tables 2, 3, and 4**. Accepted clinical ranges for each condition identified by routine health screenings through consultation with physicians and were applied automatically to the routine health screening data without requiring physicians to annotate the data on a per-patient basis (**Supplementary Methods**) [25, 30, 31]. Obesity (39.7%) and elevated blood pressure (19.3%) were identified as most prevalent among the screened population. In comparing our data to the latest release of the National Family and Health Survey, we detected higher prevalence of high BMI and elevated blood pressure for both females and males but a similar prevalence of low BMI (**Supplementary Tables 5, 6**) [32].

**Population demographic analysis:** It took an average of approximately 35 minutes for each patient to complete the medical questionnaire, routine health screenings and TES screening. Overall, there were more male than female participants which is likely at least in part the consequence of the fact that there are generally more male pilgrims at outdoor Indian religious festivals, including the Kumbh Mela. The gender breakdown for nearly all tests was approximately 60% males and 40% females, though gait analysis had an equal percent of both because the subjects who stayed long enough to complete that screening happened by chance to be split equally among males and females (**Supplementary Fig 3**). Adolescents (18 and 19 years of age) and old adults (65-90 years of age) were approximately 30% of the total population (**Supplementary Fig 4**). The remaining 70% of the population comprised approximately 31% of young adults (20-39 years) and approximately 39% middle age (40-64 years) subjects (**Supplementary Fig 4**). Three-fold more female than male adolescents and four-fold more old-aged males than old-aged females participated in the study, whereas other age groups had roughly equal numbers of males and females (**Supplementary Table 1**)

**Medical questionnaire responses:** Medical histories of dental issues, swollen joints, hearing difficulties, and leg cramps were each reported by 26.1%, 25.3%, 21.9%, 18.6% of the population, respectively (**Supplementary Table 2**). Several respondents reported a history of diabetes, blood pressure and cardiovascular diseases in their families. 8.9% of total respondents reported that they had been diagnosed with high blood pressure, and 6.3% were being treated for the disease (**Supplementary Table 2**). Subjects diagnosed with a certain clinical condition and/or undergoing treatment for it may not be the same individuals. 50.0% out of 494 respondents reported they wear glasses, indicating that they have refractive error vision problems. (**Supplementary Table 2**). Roughly equal numbers of both sexes responded yes to the majority of questions, with the exception of tobacco addiction,



1  
2 155 which was reported almost exclusively by males (**Supplementary Table 2**). **Supplementary Table 3** shows the  
3  
4 156 age-cohort distribution of percentage of the people who said yes to a particular question (e.g. approximately 17%  
5  
6 157 of the 98 subjects who said they had family history of diabetes were 18-19 year olds). Barring family history of  
7  
8 158 diabetes, high blood pressure, and thyroid and cardiovascular diseases; higher percentages of middle- and older-  
9  
10 159 aged adults said yes to the majority of all other questions (**Supplementary Table 3**). Additionally, higher  
11  
12 160 percentages of individuals in the middle and old age groups vs. adolescents and young adults answered yes to  
13  
14 161 medical history questions (e.g. approximately 35% of the 65 subjects in the 18-19 age group said they had a  
15  
16 162 vision problem vs. approximately 67% and approximately 75% of 40-64 and 65-90-year-olds) (**Supplementary**  
17  
18 163 **Table 4**). **Supplementary Tables 2, 3, and 4** each show the full list of questions asked in the medical  
19  
20 164 questionnaire.

21 165 **Prevalence of obesity and hypertension in males and low BMI in young females:** Routine health screenings  
22  
23 166 showed that approximately 19.3% of 455 subjects in the study had elevated blood pressure, and 0.9% had lower  
24  
25 167 than normal blood pressure (**Table 1**). 22.5% of the 276 tested males of all age groups had elevated blood  
26  
27 168 pressure measurements compared to 14.5% of the 179 tested females (**Table 2**). High BMI was measured in  
28  
29 169 39.7% of the tested population (**Table 1**). Middle age adults (40-64 years) had statistically significantly higher BMI  
30  
31 170 than young adults (20-39 years) and old age subjects (65-90 years) (**Supplementary Table 7**). Middle and old  
32  
33 171 age subjects also had statistically significantly higher BP than adolescents and adult participants in the study  
34  
35 172 (**Supplementary Table 7**). Approximately 18.0% of the tested population was underweight (**Table 2**). More  
36  
37 173 females in the 18-19 and 20-39 age groups and more males in the 40-64 and 65-90 age groups had lower BMI  
38  
39 174 than subjects in other age groups (**Supplementary Table 5**). Overall, more males aged 20-39 were found to be  
40  
41 175 obese compared to females of that age group ( $p=0.0375$ ) who in fact were scored as underweight by statistical  
42  
43 176 significance. Forty-two subjects, the majority in the 40-64 age group, suffered from hypertension and had high  
44  
45 177 BMI. Underweight males and females between the ages of 40-64 also found to be at higher risk for elevated blood  
46  
47 178 pressure ( $n=9$ ).

48 179 **Comparisons between medical questionnaire and results from routine health screenings:** Adults aged 40  
49  
50 180 years and older of both sexes who were classified as abnormal in any routine health screening were the largest  
51  
52 181 group of subjects correspondingly reporting family history, being diagnosed with, or receiving treatment for  
53  
54 182 several diseases on the questionnaire. **Supplementary Table 8** lists  $p$ -values and percentages for cross-  
55  
56 183 correlations between medical histories and results from routine health screenings. Statistically significant  
57  
58 184 correlations between obesity and subjects who wore glasses (58.7%), reported high blood pressure (13.3%) or  
59

1  
2 185 had a family history of diabetes (24.5%) or hypertension (20.9%) were identified ( $p = 0.0024$ ,  $p = 0.0091$ ,  $p =$   
3  
4 186  $0.0384$ ,  $p = 0.0173$ , respectively) (**Supplementary Table 8**). Interestingly, overweight subjects were more  
5  
6 187 statistically significantly likely to be non-smokers; conversely, underweight subjects were more likely to be either  
7  
8 188 addicted to tobacco and/or smokers ( $p = 0.0406$ ,  $p = 0.0122$ , respectively). Occurrences of high blood pressure  
9  
10 189 cross-correlated with several groups of individuals' with a medical history of swollen joints, difficulty walking and  
11  
12 190 diabetes ( $p = 0.0425$ ,  $p = 0.0483$ ,  $p = 0.0004$ , respectively). Subjects reporting either history of hypertension ( $n=7$ )  
13  
14 191 or undergoing hypertension treatment ( $n=14$ ) were statistically significantly more likely ( $p = 0.0006$ ,  $p = 0.0002$ ) to  
15  
16 192 be measured with high blood pressure during our screening (**Supplementary Table 8**). High BMI and high blood  
17  
18 193 pressure were additionally found to be correlated with many conditions on the medical questionnaire  
19  
20 194 (**Supplementary Table 9**).

21 195 **Identification of clinical conditions using TES:** Fig 2 shows representative diagnostic images and associated  
22  
23 196 diagnoses captured using TES. Intraoral fluorescent (63.3%), tympanic membrane (13.0%) and oxygen saturation  
24  
25 197 (4.2%) imaging examinations identified the largest percentage of unhealthy subjects (**Table 1**). **Supplementary**  
26  
27 198 **Table 10** shows the breakdown of abnormal results by gender and age range. Approximately 38.0% of subjects  
28  
29 199 had dental caries and 28.0% had one or more teeth missing. Periodontal diseases were found in 14.8% of the  
30  
31 200 population (**Supplementary Table 11**). Previously undiagnosed subjects with abnormalities in their ECG rhythm  
32  
33 201 strip ( $n=1$ ), optic nerve imaging ( $n=9$ ), gait analysis ( $n=5$ ) and finger-nose coordination ( $n=3$ ) test results were  
34  
35 202 identified (**Table 1**). The expert physicians annotated all nine subjects identified with abnormal optic nerve heads  
36  
37 203 with a cup-to-disc ratio more than 0.3. All subjects who completed the hand tremor and finger-count tests were  
38  
39 204 found to be normal.

40 205 A slightly larger percentage of tested female participants compared to males were determined to be  
41  
42 206 unhealthy across the majority of TES tests, although the differences were not statistically significant with the  
43  
44 207 exception of middle-aged females who were statistically more likely to have poor dental health than middle-aged  
45  
46 208 males ( $p=0.0266$ ). Middle-aged ( $n=120$ ) and older ( $n=66$ ) adults of both sexes encompassed 70.7% of all subjects  
47  
48 209 with abnormal oral TES results (**Supplementary table 10**). Statistically higher prevalence of dental diseases was  
49  
50 210 measured in 65-90-year-olds and 40-64-year-olds compared to 18-19-year-olds and 20-39-year-olds ( $p<0.0001$  in  
51  
52 211 all four cases). Low blood oxygen saturation and abnormal tympanic membranes were found in 13 and 26  
53  
54 212 subjects, respectively, who also had dental issues (**Supplementary table 12**). One subject each had low blood  
55  
56 213 oxygen, tympanic membrane problems and unsatisfactory performance in the gait test. Adults aged 40 and above  
57  
58 214 of both sexes were the majority of the subjects who failed two TES tests.

1  
2 215 **Identification of subjects with abnormal routine health screenings and TES results:** Numbers of subjects  
3  
4 216 who were scored not normal in one test each from TES and routine health screening are shown in  
5  
6 217 **Supplementary Table 13.** High and low BMI followed by elevated blood pressure measurements were most  
7  
8 218 prevalent in subjects with abnormal TES results. Underweight individuals made up 18.0% of the population (**Table**  
9  
10 219 **1**), and 42.1% of these individuals also had low blood oxygen saturation ( $p=0.0110$ ) (**Supplementary Table 13**).  
11 220 Similarly, approximately one third of the individuals with tympanic membrane abnormalities also had low BMI.  
12  
13 221 Abnormal optic disc diameters were measured in four overweight participants (**Supplementary Table 13**). Dental  
14  
15 222 screening identified the largest numbers of unhealthy subjects from the population who were measured with either  
16  
17 223 high BMI, low BMI or elevated blood pressure, but these cross-correlations were not statistically significant due to  
18  
19 224 extensive prevalence poor oral health in the community. Overall, high BMI (39.7%) and elevated blood pressure  
20  
21 225 (19.3%) and poor dental health (63.3%) were widespread in middle-aged and older adults of the population  
22  
23 226 (**Table 1, Supplementary tables 5 and 10**).

24  
25 227 **Comparisons between medical questionnaire and results from TES:** **Table 2** shows percentages of subjects  
26  
27 228 who were scored as not normal in a particular TES test and responded yes to a medical history question.  
28  
29 229 Individuals with swollen joints, hearing, and walking issues were found to be more likely to be scored as abnormal  
30  
31 230 in TES tests compared to other groups. Four subjects (21.1%) measured with low oxygen saturation had a  
32 231 medical history of being smokers and this correlation was statistically significant (**Supplementary table 14**).  
33  
34 232 40.5% of the subjects for whom we identified tympanic membrane abnormalities reported hearing issues  
35  
36 233 ( $p=0.0053$ ). (**Supplementary table 14**). Presence of dental caries, gingivitis and or periodontal diseases was  
37  
38 234 correlated with more statistically significant incidences of various clinical conditions reported in the medical  
39  
40 235 questionnaire. High percentages of subjects scored as not normal in the finger-nose ( $n=3$ ) and or gait tests ( $n=5$ )  
41  
42 236 had reported hearing issues (**Table 2**). Similar to results in routine health screenings, individuals aged 40 years  
43  
44 237 and older of both sexes were the largest group of subjects who gave affirmative responses to the questionnaire  
45  
46 238 and abnormal TES results, although this was not statistically significant.

47  
48 239 **TES synergistically identifies unique subset of abnormal individuals in conjunction with routine health**  
49  
50 240 **screenings:** Data from subjects who completed the medical questionnaire, all routine health screenings and all  
51  
52 241 TES tests ( $n=111$ ) allowed comprehensive analyses. Subjects who exited the study before completing all routine  
53  
54 242 health screenings and TES tests were not considered in these analyses. Routine health screenings identified 32  
55 243 as normal and 79 as abnormal from these 111 subjects, compared to 41 normal and 70 abnormal subjects  
56  
57 244 classified by TES (**Supplementary Table 15**). **Supplementary Tables 16 and 17** show the data for each of the  
58

1  
2 245 111 subjects. Our data indicates that a similar percentage of these 111 subjects benefitted from diagnosis offered  
3  
4 246 by TES as those screened by routine health screenings. **Table 3** shows the age and gender profiles for 111  
5  
6 247 subjects and the differential diagnoses between the two screening methods.

7  
8 248 Overall, we found abnormal BMI measurements and poor dentition led to the majority of the abnormalities  
9  
10 249 in these 111. Tympanic membrane and BP abnormalities were the second-most widespread in this cohort.  
11 250 Medical questionnaire responses and TES screening results from these 111 subjects illustrate another use case  
12  
13 251 with value for augmented screening. Several individuals with healthy medical histories were found to have either  
14  
15 252 abnormal routine health screenings (n=12) or TES results (n=7) or both (n=6). Dental and ear issues were the  
16  
17 253 most common TES abnormalities associated with these subjects with healthy medical histories. Importantly, all  
18  
19 254 seven subjects with a healthy medical questionnaire identified as abnormal by TES (dental, n=5; optic nerve, n=1;  
20  
21 255 tympanic membrane, n=1) had no previous diagnoses of these conditions and were different from the 12  
22  
23 256 individuals with abnormal routine health screenings. These results indicate the unique and synergistic value of  
24  
25 257 TES in providing comprehensive care in conjunction with routine health screenings.

1  
2 258 DISCUSSION

3  
4 259 Many of the subjects identified by TES did not have any abnormal routine health screenings, indicating  
5  
6 260 that TES can play a role in identifying subjects who need care but would not be identified by routine health  
7  
8 261 screenings alone. Each TES test identified distinctive abnormalities in different patients and played a distinct role in  
9  
10 262 identifying at-risk or sick individuals. Because the TES tests screen for much different conditions than the routine  
11  
12 263 health screenings, our results indicate mutually independent but not entirely mutually exclusive performances of  
13  
14 264 both in identifying at-risk or sick subjects. We examined several potential moderators and old age was a  
15  
16 265 statistically significant premonition for abnormal TES results, underscoring the crucial role for augmented  
17  
18 266 screenings in middle-aged and geriatric individuals. Large proportions of subjects identified with abnormalities in  
19  
20 267 oral (69.1%), tympanic membrane (59.5%), and retinal (33.3%) tests, as well as the only subject in the single-lead  
21  
22 268 ECG test, did not report their respective conditions on their medical questionnaires. TES thus facilitates more  
23  
24 269 thorough and non-invasive primary care screenings and may expedite early interventions for conditions not  
25  
26 270 identified by routine health screenings.

27  
28 271 Routine health screenings provided valuable insights into the rising epidemics of hypertension and  
29  
30 272 obesity in the screened population in our study. Approximately 19.3% of the screened population in our study was  
31  
32 273 suffering from hypertension. 18.0% of the screened population in our study was underweight (BMI <18.5) and  
33  
34 274 several of these subjects were hypoxic, with low oxygen saturation, which can be considered a proxy measure for  
35  
36 275 anemia. Pulseoximetry screenings identified 19 subjects with <90% SpO<sub>2</sub>. Vold et.al, in studies carried out in  
37  
38 276 Norway, have reported high BMI, middle age and smoking as predictors of oxygen saturation[33]. Subjects with  
39  
40 277 low blood oxygen had medical histories of smoking addiction and asthma. Most of them were middle-aged males,  
41  
42 278 and the majorities were underweight. We also detected optic nerve abnormalities, dental diseases, gait and  
43  
44 279 hearing difficulties in subjects with low blood oxygen, suggesting that a poor overall health status may co-exist  
45  
46 280 with low blood oxygen measurements. Our data suggests the usefulness of deploying pulse oximetry for general  
47  
48 281 health screenings, especially for underweight patients in LMIC.

49  
50 282 Inadequate dental hygiene and resulting sequelae can have significant impact on quality of life and  
51  
52 283 increase the risk of cardiovascular diseases[34, 35]. "Remote monitoring" and "Store-forward" approaches for  
53  
54 284 dental examinations, reviewed elsewhere[36], have been used for teledentistry. In patients aged 65-74 years, the  
55  
56 285 prevalence of caries was approximately 70% and multi-centric oral health survey reported the prevalence of  
57  
58 286 carries to be 51-95% [37]. We found approximately 48% of 65-90-year-olds diagnosed with caries or periodontal

1  
2 287 disease. A high percentage of 45-60-year-old subjects in our study, who usually may not have been detected by  
3  
4 288 traditional methods, were identified with poor dental health and may have been detected due to the more  
5  
6 289 comprehensive evaluation offered by TES. Significant cross-correlations between patients reporting  
7  
8 290 cardiovascular treatment with poor oral health ( $p=0.0267$ ) was identified, underscoring the importance of routine  
9  
10 291 dental care and calling for urgent attention to the oral disease epidemic in India.

11  
12 292 There are approximately 11.2 million persons aged 40 years and older with glaucoma in India[38]. The  
13  
14 293 most common optic nerve abnormalities that were detected in our study were optic nerve cupping as a risk factor  
15  
16 294 for glaucoma, and optic nerve head neovascularization that is a sign of diabetic retinopathy. All nine patients who  
17  
18 295 were scored as abnormal by optic nerve photography in our study had a DDLS scores of three, indicating early  
19  
20 296 onset of glaucoma. The majority of these patients were females aged between 20-64 years whereas two old age  
21  
22 297 males were marked abnormal. Four patients were also obese and high blood pressure was measured in two  
23  
24 298 individuals, highlighting vulnerable status of young and middle aged obese Indian population.

25  
26 299 Smartphone-enabled tele-otology has been deemed suitable for both on-site and remote diagnoses of  
27  
28 300 tympanic membrane and Otitis media (OM) previously[39]. Perforated tympanic membranes (59.2%) and/or  
29  
30 301 effusions (47.6%) were most prevalent in patients labeled as abnormal by ENT surgeons. These patients may  
31  
32 302 have been suffering from OM infection and or a generalized inflammation. A large segment of these subjects were  
33  
34 303 middle age or older adults and were also the predominant group that failed the gait and coordination test.  
35  
36 304 Physician consensus, imaging data and a history of hearing issues emphasize the substantial challenges in  
37  
38 305 diagnosing and treating these patients. We did not perform audiology or speeches tests with these subjects and  
39  
40 306 thus are unable to cross correlate the imaging data with functional tests.

41  
42 307 Due to acute shortages of trained neurologists, diagnoses of neurological disorders is extremely  
43  
44 308 challenging in LMIC[40]. Three subjects in the finger-nose test were identified with incoordination and dysmetria.  
45  
46 309 Seven out of the eight total subjects failing neurological tests were males older than 40 years, and three were  
47  
48 310 underweight. The majority of subjects failing either the gait and/or finger-nose tests a medical history of swollen  
49  
50 311 joints and a few said that they had difficulty in walking (all subjects were able to walk unassisted). It is conceivable  
51  
52 312 that these issues may be unlinked or causal to their performance in the gait test. However, none of these  
53  
54 313 conditions had previously been diagnosed in these individuals reaffirming a need for more aggressive and large-  
55  
56 314 scale screening using TES methods. We are working on generative algorithms for classification of various  
57  
58 315 neurological disorders and hope to incorporate these in future studies.



1  
2 316 Physicians using TES devices in our study commented that a brief period of acclimatization was  
3  
4 317 necessary in both use and interpretation of results from the devices before use in the study. Incorporating training  
5  
6 318 for use of mobile technologies for diagnoses during medical school can reduce this learning curve. To our  
7  
8 319 surprise, most of our tele-examination physicians could accurately diagnose presented conditions often with  
9  
10 320 overwhelming consensus between them. Patients enrolled in our study were also pleased to see immediate  
11  
12 321 results from TES and get rapid feedback from physicians. We acknowledge that TES devices may provide only an  
13  
14 322 indication of the clinical pathologies they evaluate instead of a thorough diagnosis. Despite the claims made by  
15  
16 323 device manufacturers, we also recognize that in their current form-factor TES will not replace or completely  
17  
18 324 remove the physician from the loop. We used representative, clinically validated devices in this study, and our  
19  
20 325 diagnoses may be generalizable to findings from similar datasets. Due to some subjects leaving the study early,  
21  
22 326 the numbers of patients examined by each TES test and routine health screening were not identical, restricting  
23  
24 327 more comprehensive analyses to the 111 subjects who completed all tests. Although this work is one of the  
25  
26 328 largest, if not the largest, studies carried out using a wide array of different TES methods, a larger sample size in  
27  
28 329 follow-up studies may result in more comprehensive identification of patient demographics and the full gamut of  
29  
30 330 clinical conditions. We do, however, emphasize that one goal of this study was to conduct a cross-sectional  
31  
32 331 analysis of both the population and the tests instead of focusing on only one TES method with a large sample  
33  
34 332 size.

34 333 While routine health screenings continue to be important, this study demonstrates that the emerging  
35  
36 334 techniques of TES can play an important synergistic role in stratifying populations and providing personalized  
37  
38 335 screening and care, especially in LMIC. Multiple TES screening methods and data analyses outlined in this study  
39  
40 336 can help in training and standardization for deployment of augmented, low-cost, non-invasive and portable  
41  
42 337 screening approaches in conjunction with traditional primary healthcare exams, leading to increased clinical  
43  
44 338 interventions, diagnoses and awareness of health conditions for individuals.

## Footnotes

**Acknowledgments:** We thank physicians, staff, student volunteers and Dr. Sanjay Bhawsar of MGVBHDC for support for conducting this study, Dr. Arun Jamkar and Maharashtra Health and Sciences University, India for guidance to select the location and Krishna Rastogi, Sathya Sai, Hisham Bedri, Geetanjali Rathore, Mayank Kumar and Akshat Wahi for technical assistance. Dr. Judy-Fine Edelstein, Dr. Diana Green and Tek Yadav of Cambridge Health Alliance, Cambridge, MA; Dr. Maneesh Bapaye, Sunil Ugale, Dr Shirish Ghan and Dr. Roma Bagi Nashik, India and Dr. Tulio Valdez, Massachusetts Institute of Technology for help in expert clinical evaluations.

**Licensing:** *The Corresponding Author has the right to grant on behalf of all authors and does grant on behalf of all authors, a worldwide licence to the Publishers and its licensees in perpetuity, in all forms, formats and media (whether known now or created in the future), to i) publish, reproduce, distribute, display and store the Contribution, ii) translate the Contribution into other languages, create adaptations, reprints, include within collections and create summaries, extracts and/or, abstracts of the Contribution, iii) create any other derivative work(s) based on the Contribution, iv) to exploit all subsidiary rights in the Contribution, v) the inclusion of electronic links from the Contribution to third party material where-ever it may be located; and, vi) licence any third party to do any or all of the above."*

**Data sharing:** *Anonymized patient level data and or full dataset will be made available following standard MIT COUHES data sharing protocols.*

**Funding:** *Massachusetts Institute of Technology Media Lab and Karmaveer Bhausahab Hiray Dental College and Hospital departmental funds.*

**Competing interests:** *"All authors have completed the ICMJE uniform disclosure form at [www.icmje.org/coi\\_disclosure.pdf](http://www.icmje.org/coi_disclosure.pdf) and declare: no support from any organisation for the submitted work; no financial relationships with any organisations that might have an interest in the submitted work in the previous three years; no other relationships or activities that could appear to have influenced the submitted work."*

**Author contributions:** *Otkrist Gupta, Mrinal Mohit, and Gregory Yauney organized the data received from collaborating institution by pooling various test data for each patient, Otkrist Gupta created a web analysis platform for remote examinations; Pratik Shah, Otkrist Gupta, SV Subramanian, Vincent Patalano and Gregory Yauney analyzed and interpreted data labeled by expert physicians; Pratik Shah, Gregory Yauney, and Otkrist Gupta performed literature search; Gregory Yauney made figures; Pratik Shah and Gregory Yauney wrote the manuscript; Rikin Merchant led clinical data collection and coordinated transfer to MIT; Pratik Shah supervised the research and directed the study at MIT.*



1  
2 376 FIGURE LEGENDS

3  
4 377  
5 378  
6 379 **Fig 1.** Study design. Flowchart for overall screening procedure.

7 380  
8 381  
9 382  
10 383  
11 384  
12 385  
13 386  
14 387 **Fig 2.** Representative images of labeled conditions detected in technology-enabled screenings.  
15 388 (A) Normal images for technology-enabled screenings. Left-to-right, top-to-bottom: dental, periodontal, tympanic  
16 389 membrane, optic nerve.

17 390 (B) Labeled conditions for technology-enabled screenings. Left-to-right, top-to-bottom: caries, missing teeth,  
18 391 periodontal disease, perforated eardrum, effusion, width of optic rim 0.01-0.1.

19 392  
20 393  
21 394  
22 395  
23  
24 396  
25  
26 397  
27 398  
28  
29 399  
30  
31 400  
32 401  
33  
34 402  
35  
36 403  
37  
38 404  
39 405  
40  
41 406  
42  
43 407  
44 408  
45  
46 409  
47  
48 410  
49 411  
50  
51 412  
52  
53 413  
54  
55 414  
56 415  
57  
58  
59  
60

**Table 1. Results of routine health screenings and technology-enabled screenings.**

|                                      | Female     |        | Male       |        | Total      |        |
|--------------------------------------|------------|--------|------------|--------|------------|--------|
|                                      | Abnormal   | Tested | Abnormal   | Tested | Abnormal   | Tested |
| <b>Routine health screenings</b>     |            |        |            |        |            |        |
| High BMI                             | 75 (38.9)  | 193    | 121 (40.2) | 301    | 196 (39.7) | 494    |
| Low BMI                              | 42 (21.8)  | 193    | 47 (15.6)  | 301    | 89 (18.0)  | 494    |
| High BP                              | 26 (14.5)  | 179    | 62 (22.5)  | 276    | 88 (19.3)  | 455    |
| Low BP                               | 3 (1.7)    | 179    | 1 (0.4)    | 276    | 4 (0.9)    | 455    |
| <b>Technology-enabled screenings</b> |            |        |            |        |            |        |
| Low blood oxygen                     | 5 (2.8)    | 179    | 14 (5.1)   | 276    | 19 (4.2)   | 455    |
| Single-lead ECG                      | 0 (0.0)    | 168    | 1 (0.4)    | 262    | 1 (0.2)    | 430    |
| Oral                                 | 109 (68.1) | 160    | 151 (60.2) | 251    | 260 (63.3) | 411    |
| Retinal                              | 5 (3.0)    | 169    | 4 (1.7)    | 235    | 9 (2.2)    | 404    |
| Tympanic membrane                    | 17 (13.5)  | 126    | 25 (12.6)  | 198    | 42 (13.0)  | 324    |
| Hand tremor                          | 0 (0.0)    | 127    | 0 (0.0)    | 186    | 0 (0.0)    | 313    |
| Finger-nose                          | 0 (0.0)    | 123    | 3 (1.6)    | 182    | 3 (1.0)    | 305    |
| Finger-count                         | 0 (0.0)    | 122    | 0 (0.0)    | 177    | 0 (0.0)    | 299    |
| Gait                                 | 1 (1.0)    | 104    | 4 (3.6)    | 110    | 5 (2.3)    | 214    |

Numbers and percentages (in parentheses) of males and females with conditions identified by routine health screenings and technology-enabled screenings.

**Table 2. Number of subjects identified with a clinical condition by a technology-enabled screening test and responded yes to a medical history question.**

| Abnormality | No. with abnormality | Glasses   | Dental | Swollen joints | Hearing | FH diabetes | FH high BP | Tobacco | Difficulty walking | High BP | Diabetes | High BP Rx | Asthma | Smoking | FH cardiac | Cardiac Rx | Cardiovascular | Low BP | FH stroke | FH eye disease | Heart attack | Coronary bypass | Drinking | Eye treatment | Memory loss | Ear treatment | FH ear disease |
|-------------|----------------------|-----------|--------|----------------|---------|-------------|------------|---------|--------------------|---------|----------|------------|--------|---------|------------|------------|----------------|--------|-----------|----------------|--------------|-----------------|----------|---------------|-------------|---------------|----------------|
|             |                      | Hypoxemia | 19     | 7              | 9       | 3           | 5          | 2       | 0                  | 3       | 3        | 0          | 0      | 0       | 3          | 4*         | 0              | 1      | 0         | 0              | 0            | 0               | 0        | 0             | 0           | 0             | 0              |
| TM          | 42                   | 22        | 14     | 14             | 17      | 7           | 6          | 3       | 5                  | 5       | 4        | 4          | 3      | 1       | 2          | 1          | 1              | 0      | 1         | 0              | 0            | 0               | 0        | 0             | 0           | 1             | 0              |
| Retinal     | 9                    | 6         | 5      | 4              | 4       | 2           | 2          | 0       | 3*                 | 1       | 0        | 1          | 0      | 0       | 0          | 1          | 1              | 0      | 0         | 0              | 0            | 0               | 0        | 0             | 0           | 0             | 0              |
| Oral        | 260                  | 145*      | 82*    | 85*            | 72*     | 41          | 31**       | 27      | 36*                | 30      | 23       | 24*        | 15     | 13      | 7          | 8*         | 4              | 3      | 2         | 3              | 3            | 3               | 1        | 2             | 2           | 1             | 1              |
| Finger-nose | 3                    | 1         | 1      | 3*             | 2       | 0           | 0          | 1       | 3*                 | 0       | 0        | 0          | 1      | 0       | 0          | 0          | 0              | 0      | 0         | 0              | 0            | 0               | 0        | 0             | 0           | 0             | 0              |
| Gait        | 5                    | 1         | 4*     | 4*             | 3       | 1           | 0          | 0       | 1                  | 0       | 0        | 0          | 0      | 1       | 0          | 0          | 0              | 0      | 0         | 0              | 0            | 0               | 0        | 0             | 0           | 0             | 0              |

Total populations reflect the number of subjects with the particular condition in that row. Multiple subjects were associated with more than one condition or questionnaire response.

TM: tympanic membrane.

\*  $p < 0.05$ , subjects are more likely to have responded yes to the column's question and have the condition.

\*\*  $p < 0.05$ , subjects are less likely to have responded yes to the column's question and have the condition.

**Table 3. Synergistic role of technology-enabled screening in identifying at-risk or sick individuals.**

| Routine health screenings |   | Adolescent (18-19) |      | Young adult (20-39) |      | Middle age (40-64) |      | Old age (65-90) |      | Total (n=111) |
|---------------------------|---|--------------------|------|---------------------|------|--------------------|------|-----------------|------|---------------|
| TES                       |   | Female             | Male | Female              | Male | Female             | Male | Female          | Male |               |
| ✓                         | ✓ | 5                  | 0    | 3                   | 0    | 0                  | 2    | 0               | 0    | 10            |
| x                         | ✓ | 5                  | 0    | 5                   | 12   | 2                  | 6    | 0               | 1    | 31            |
| ✓                         | x | 4                  | 0    | 5                   | 4    | 5                  | 3    | 0               | 1    | 22            |
| x                         | x | 5                  | 0    | 3                   | 7    | 9                  | 15   | 2               | 7    | 48            |
| Total in age cohort       |   | 19                 | 0    | 16                  | 23   | 16                 | 26   | 2               | 9    | 111           |

Check marks indicate normal status while x indicates abnormalities in a particular screening method.

1  
2 442 REFERENCES  
3

- 4 443 1. Rivo, M. 2008 World Health Report emphasizes importance of primary health care. *Am Fam Physician*.  
5 444 2009;79(12):1051.
- 6 445 2. Alwan, A, Maclean, DR, Riley, LM, et al. Monitoring and surveillance of chronic non-communicable  
7 446 diseases: progress and capacity in high-burden countries. *Lancet*. 2010;376(9755):1861-8.
- 8 447 3. Samb, B, Desai, N, Nishtar, S, et al. Prevention and management of chronic disease: a litmus test for  
10448 health-systems strengthening in low-income and middle-income countries. *Lancet*. 2010;376(9754):1785-97.
- 11449 4. Thakur, J. Key recommendations of high-level expert group report on universal health coverage for  
12450 India. *Indian J Community Med*. 2011;36(Suppl 1):S84-5.
- 13451 5. Shi, L. The impact of primary care: a focused review. *Scientifica (Cairo)*. 2012;2012:432892.
- 14452 6. Dhawan, AP, Heetderks, WJ, Pavel, M, et al. Current and Future Challenges in Point-of-Care  
15453 Technologies: A Paradigm-Shift in Affordable Global Healthcare With Personalized and Preventive Medicine. *IEEE*  
16454 *J Transl Eng Health Med*. 2015;3:2800110.
- 18455 7. Topol, EJ. Transforming medicine via digital innovation. *Sci Transl Med*. 2010;2(16):16cm4.
- 19456 8. Puri, RS, Athanassiadis, AG, Gill, N, et al. Design and preliminary evaluation of a wearable device for  
20457 mass-screening of sleep apnea. *Annual International Conference of the IEEE Engineering in Medicine and Biology*  
21458 *Society 2016;38th*
- 22459 9. Pamplona, VF, Mohan, A, Oliveira, MM, Raskar, R. NETRA: Interactive Display for Estimating Refractive  
23460 Errors and Focal Range. *Acm T Graphic*. 2010;29(4).
- 24461 10. Swedish, T, Roesch, K, Lee, IH, et al. eyeSelfie: Self Directed Eye Alignment using Reciprocal Eye Box  
25462 Imaging. *Acm T Graphic*. 2015;34(4).
- 27463 11. Das, A, Swedish, T, Wahi, A, et al. Mobile phone based mini-spectrometer for rapid screening of skin  
28464 cancer. *Proc Spie*. 2015;9482.
- 29465 12. Giller, G. Using a Smartphone to Detect Cancer. *Sci Am*. 2014;310(5):28-.
- 30466 13. Creuzot-Garcher, C, Martin-Phipps, T, Beynat, J, et al. Effectiveness of a Mobile Diabetic Retinopathy  
31467 Screening Campaign to Encourage Diabetics to Undergo Regular Ophthalmic Follow-Up. *Ophthalmic Res*.  
32468 2014;52(4):206-11.
- 33469 14. Pirnstill, CW, Cote, GL. Malaria Diagnosis Using a Mobile Phone Polarized Microscope. *Sci Rep-Uk*.  
34470 2015;5.
- 36471 15. Granot, Y, Ivorra, A, Rubinsky, B. A new concept for medical imaging centered on cellular phone  
37472 technology. *PLoS One*. 2008;3(4):e2075.
- 38473 16. Jani, IV, Quevedo, JI, Tobaiwa, O, et al. Use of mobile phone technology to improve the quality of point-  
39474 of-care testing in a low-resource setting. *AIDS*. 2016;30(1):159-61.
- 40475 17. Muhlestein, JB, Le, V, Albert, D, et al. Smartphone ECG for evaluation of STEMI: results of the ST LEUIS  
41476 Pilot Study. *J Electrocardiol*. 2015;48(2):249-59.
- 42477 18. Rechmann, P, Liou, SW, Rechmann, BM, Featherstone, JD. Performance of a light fluorescence device for  
43478 the detection of microbial plaque and gingival inflammation. *Clin Oral Investig*. 2016;20(1):151-9.
- 45479 19. Gabel, M, Gilad-Bachrach, R, Renshaw, E, Schuster, A. Full Body Gait Analysis with Kinect. *Ieee Eng Med*  
46480 *Bio*. 2012:1960-7.
- 47481 20. Richards, JR, Gaylor, KA, Pilgrim, AJ. Comparison of traditional otoscope to iPhone otoscope in the  
48482 pediatric ED. *Am J Emerg Med*. 2015;33(8):1089-92.
- 49483 21. Eikelboom, RH, Mbao, MN, Coates, HL, Atlas, MD, Gallop, MA. Validation of tele-otology to diagnose ear  
50484 disease in children. *Int J Pediatr Otorhi*. 2005;69(6):739-44.
- 51485 22. Kopycka-Kedzierawski, DT, Bell, CH, Billings, RJ. Prevalence of dental caries in Early Head Start children  
52486 as diagnosed using teledentistry. *Pediatr Dent*. 2008;30(4):329-33.
- 53487 23. Russo, A, Morescalchi, F, Costagliola, C, Delcassi, L, Semeraro, F. A Novel Device to Exploit the  
54488 Smartphone Camera for Fundus Photography. *J Ophthalmol*. 2015;2015:823139.
- 56489 24. Baranwal, A, Anand, A, Singh, R, et al. Managing the Earth's Biggest Mass Gathering Event and WASH  
57490 Conditions: Maha Kumbh Mela (India). *PLoS Curr*. 2015;7.

- 1  
2 491 25. Nitzan, M, Romem, A, Koppel, R. Pulse oximetry: fundamentals and technology update. *Med Devices*  
3 492 (Auckl). 2014;7:231-9.
- 4 493 26. Gagnon, C, Mathieu, J, Desrosiers, J. Standardized finger-nose test validity for coordination assessment  
5 494 in an ataxic disorder. *Can J Neurol Sci*. 2004;31(4):484-9.
- 6 495 27. Norman, KE, Heroux, ME. Measures of fine motor skills in people with tremor disorders: appraisal and  
7 496 interpretation. *Front Neurol*. 2013;4:50.
- 8 497 28. Salzman, B. Gait and balance disorders in older adults. *Am Fam Physician*. 2010;82(1):61-8.
- 9 498 29. Spaeth, GL, Henderer, J, Liu, C, et al. The disc damage likelihood scale: reproducibility of a new method  
10 499 of estimating the amount of optic nerve damage caused by glaucoma. *Trans Am Ophthalmol Soc*. 2002;100:181-  
12500 5; discussion 5-6.
- 13501 30. Clinical Guidelines on the Identification, Evaluation, and Treatment of Overweight and Obesity in Adults-  
14502 -The Evidence Report. National Institutes of Health. *Obes Res*. 1998;6 Suppl 2:51S-209S.
- 15503 31. Pickering, TG, Hall, JE, Appel, LJ, et al. Recommendations for blood pressure measurement in humans  
16504 and experimental animals; part 1: blood pressure measurement in humans: a statement for professionals from  
17505 the Subcommittee of Professional and Public Education of the American Heart Association Council on High Blood  
18506 Pressure Research. *Circulation*. 2005;111(5):697-716.
- 20507 32. Kumar, A, Kalra, S, Unnikrishnan, AG. Metabolic state of the nation: Results of the national family health  
21508 survey-4. *Indian J Endocrinol Metab*. 2016;20(4):429-31.
- 22509 33. Vold, ML, Aasebo, U, Melbye, H. Low FEV1, smoking history, and obesity are factors associated with  
23510 oxygen saturation decrease in an adult population cohort. *Int J Chron Obstruct Pulmon Dis*. 2014;9:1225-33.
- 24511 34. DeStefano, F, Anda, RF, Kahn, HS, Williamson, DF, Russell, CM. Dental disease and risk of coronary heart  
25512 disease and mortality. *BMJ*. 1993;306(6879):688-91.
- 26513 35. Mendez, MV, Scott, T, LaMorte, W, et al. An association between periodontal disease and peripheral  
27514 vascular disease. *Am J Surg*. 1998;176(2):153-7.
- 29515 36. Jampani, ND, Nutalapati, R, Dontula, BS, Boyapati, R. Applications of teledentistry: A literature review  
30516 and update. *J Int Soc Prev Community Dent*. 2011;1(2):37-44.
- 31517 37. Veerasamy, A, Kirk, R, Gage, J. Epidemiology of dental caries among adolescents in Tamil Nadu, India. *Int*  
32518 *Dent J*. 2016;66(3):169-77.
- 33519 38. George, R, Ve, RS, Vijaya, L. Glaucoma in India: estimated burden of disease. *J Glaucoma*.  
34520 2010;19(6):391-7.
- 35521 39. Mbao, MN, Eikelboom, RH, Atlas, MD, Gallop, MA. Evaluation of video-otoscopes suitable for tele-  
36522 otology. *Telemed J E-Health*. 2003;9(4):325-30.
- 37523 40. Gourie-Devi, M. Epidemiology of neurological disorders in India: review of background, prevalence and  
38524 incidence of epilepsy, stroke, Parkinson's disease and tremors. *Neurol India*. 2014;62(6):588-98.

40 525

41

42

43

44

45

46

47

48

49

50

51

52

53

54

55

56

57

58

59

60

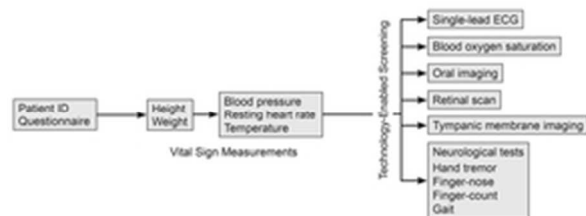

Fig 1. Study design. Flowchart for overall screening procedure.

25x9mm (300 x 300 DPI)

For peer review only

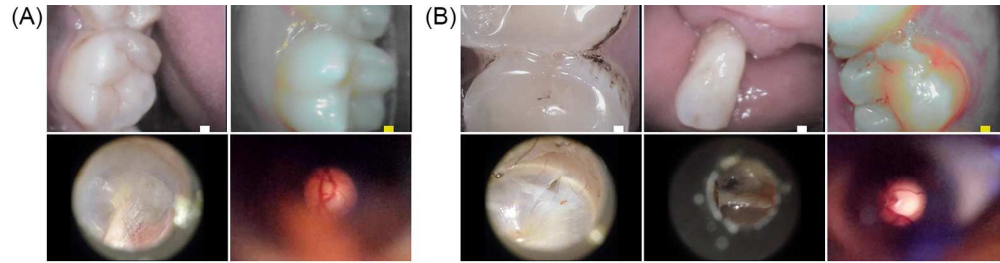

Fig 2. Representative images of labeled conditions detected in technology-enabled screenings.  
(A) Normal images for technology-enabled screenings. Left-to-right, top-to-bottom: dental, periodontal, tympanic membrane, optic nerve.  
(B) Labeled conditions for technology-enabled screenings. Left-to-right, top-to-bottom: caries, missing teeth, periodontal disease, perforated eardrum, effusion, width of optic rim 0.01-0.1.

149x38mm (300 x 300 DPI)

Peer review only

1  
2 **1 Supplementary Appendix**

3 2

4 3 Contents

5 4 Page 2: Supplementary Methods

6 5 Page 5: Supplementary Figures

7 6 Page 7: Supplementary Tables

8  
9  
10  
11  
12  
13  
14  
15  
16  
17  
18  
19  
20  
21  
22  
23  
24  
25  
26  
27  
28  
29  
30  
31  
32  
33  
34  
35  
36  
37  
38  
39  
40  
41  
42  
43  
44  
45  
46  
47  
48  
49  
50  
51  
52  
53  
54  
55  
56  
57  
58  
59  
60

For peer review only



## Supplementary Methods

**Criteria, ethical considerations and consent procedure:** Mahatma Gandhi Vidyamandir Karmaveer Bhausaheb Hiray Dental College & Hospital (MGVKBHDC) in Nashik was designated as one of the primary health provision and disaster management centers for the 2015 Sinhasht Kumbh Mela (14 July-25 September). The hospital has an outpatient facility where pilgrims and local people were provided care, information and a resting area throughout the event. Indians between the ages of 18 years and 90 years of all ethnicities, races and genders were included in the study. Subjects younger than 18 years or older than 90 years were excluded from participation. 494 consenting adults were seen in the week that MGVKBHDC was soliciting volunteers. We anticipated pilgrims and out-of-state consenting adults would be the largest group to volunteer to be enrolled in this study, allowing us to examine inhabitants from all over the county, but local Indians were also allowed to participate. MGVKBHDC institutional human subjects review committee approved our consent procedure, clinical data collection and the plan for communication of testing results with the subjects (Protocol number: MGVKBHDC/15-16/571). Bilingual physicians from MGVKBHDC explained the scope of the study and consent forms (in English or Hindi) to subjects who were interested in participating. Subjects were asked to sign the consent forms and then remain in a waiting area before active participation in the study. Participants were free to leave at any point during their screenings. MGVKBHDC primary care physicians, dentists, ophthalmologists, otolaryngologists and neurologists performed the health screenings in the order outlined in **Fig 1**, communicated the results to subjects and provided appropriate referrals to patients needing additional medical care. De-identified data was transferred to the Massachusetts Institute of Technology (MIT) investigators for analysis after approval of the protocol by the MIT Committee on the Use of Humans as Experimental Subjects (MIT COUHES protocol number: 1512338971).

**Data collection:** A unique registration number (1-494) linked to each subject was used to store and annotate data from screening kiosks.

**Medical history and routine health screenings:** Self-reported responses of subjects to a detailed computerized questionnaire that included geographic and demographic questions, questions about past medical history and current illnesses. A bilingual physician recorded the medications and symptoms reported by the subjects as well as their reports of family medical history. An Omron 10 series wireless upper arm monitor with cuff (Model: BP786N) was used to collect systolic and diastolic blood pressure following the manufacturer's instructions (Omron Electronics, USA). Temperatures were measured using a digital thermometer. Height and body weight were measured using a digital scale and were recorded for all subjects.

### Technology-enabled screening devices:

**Blood oxygen saturation:** A CMS 50-DL Pulse Oximeter (Contec Medical Systems, USA) was used to measure blood oxygen saturation levels of hemoglobin based on photoplethysmographic pulses and pulse rate from subjects' right index fingertips [25].

**ECG:** The AliveCor Mobile ECG (AliveCor Inc, USA) is a single-channel cardiac event recorder consisting of a device and smartphone app that can record and review ECGs [17]. a 30-second rhythm strip (lead I) recording was uploaded wirelessly for interpretation via the AliveCor algorithm, and an ECG analysis that indicated heart rate and presence of possible atrial fibrillation was displayed on the mobile phone. Before each use, a physician cleaned the two electrodes with alcohol-based sanitizer and launched the app on the smartphone (Nexus5, LG, South Korea).

**Tympanic membrane imaging:** Inspection of the external ear canal and eardrum was performed using the iPhone5 LEDs and camera with the CellScope Oto phone adapter (CellScope Inc. USA) [20]. A disposable ear tip attached to the device canula was used for imaging each subject.

**Oral imaging:** A commercially available FDA-approved intraoral camera with software, SOPROCARE (SOPRO Acteon Imaging, France), that automatically segments and displays images of plaque, caries and periodontal diseases was used [18]. Panning 30-second videos of the buccal surfaces of the upper first molars (16, 26), the buccal surface of the upper laterals (12, 22), the buccal surface of first lower molars (36, 46), as well as incisal, buccal and lingual surfaces of all accessible teeth were collected. The housing of the camera stick was covered in a clear disposable plastic sheath (U-line, USA) and sterile disposable camera bag. Subjects and clinicians wore UV protective eyewear during oral imaging. Images and video were collected by each of the following modes: (A) only 405nm LEDs powered, (B) only 450nm LEDs powered, (C) only white

LEDs powered. A HP 620 Notebook (Hewlett Packard, USA), Windows 7, (Microsoft Corporation, USA) with preloaded SOPROCARE software was used to store images and videos. A specialized scale for assigning patient scores vs. conventional DMFT (number of decayed, missing and filled teeth in an individual and in a population) or the Russell's periodontal indices was used by dentist examining the data. The camera system uses standard white light and three blue LEDs that emit non-ionizing light at 450 nm wavelengths. Inflamed gingiva can be scored due to fluorescence from porphyrins in blood. Illumination of microbial plaque with blue light induces fluorescence due to the bacteria and porphyrin content of the plaque.

**Optic nerve head photography:** Non-mydratic digital retinal imaging using the D-EYE (D-EYE Srl, USA) direct ophthalmoscopy adapter attached to iPhone5s camera was performed to capture video and still images of optic nerves of subjects [23].

**Gait and coordination analyses:** The Microsoft Kinect (Microsoft Corporation, USA) sensor has an RGB camera, depth sensor and multi-array microphone, which provide full-body 3D motion capture, facial and voice recognition capabilities [19]. A 2D, depth and skeleton motion dataset of motor skills, hand-eye coordination, depth perception, neuromuscular stability of individual subjects was captured by the following protocol: a) finger-nose test with index finger touching a ball suspended from the ceiling two feet in front and then the nose: to identify tremors, incoordination, and dysmetria [26]; b) finger-count dexterity test to count to five using thumb touching fingertips: to detect slowness, tremors, and incoordination [27]; c) holding out hands steadily with palms facing down: to detect tremors and arm drift (upward, downward and lateral) [27], d) walking a distance of 2.5 meters in a straight line, turning around and walking back: to identify subjects who have posture abnormalities, tremors, imbalance (left/right), a penguin gait, or an asymmetric gait while walking [28]. Kinect sensors placed in front of and behind subjects were used to capture the walking in straight-line actions (**Supplementary Fig 1B**). For all other tests, one Kinect sensor was placed unobtrusively to the left or right of the subjects (**Supplementary Fig 1A**).

**Data analyses:** De-identified data assigned to unique subject IDs was split into five separate pools consisting of optic nerve, tympanic membrane, ear, oral and neurological videos for all study participants. BMI, blood pressure, resting heart rate and body temperature are routinely measured without sophisticated TES by most primary care providers and have been collectively annotated as "routine health screenings" throughout this study. Other imaging and smartphone-based tests have been designated as TES methods. Routine health screenings and responses to medical questionnaires were grouped together for computational analyses. Resting heart rate and temperature have clinically well-defined normal, high and low ranges. For BMI, numbers less than 19 were labeled low, between 19 and 25 were characterized as normal, and 25 and above were considered high [30]. For blood pressure, systolic pressure below 90 mmHg or diastolic pressure below 60 mmHg was considered low, systolic pressure between 90 and 140 mmHg and diastolic pressure between 60 and 90 mmHg was labeled normal, and systolic pressure above 140 mmHg or diastolic pressure above 90 mmHg was labeled high [31]. Blood oxygen levels of 90% or less were annotated low. The outputs from the AliveCor mobile app were readily used as annotations for ECG tests because they were labeled 'Normal' or 'Possible atrial fibrillation' [25].

Videos captured by TES devices were categorized by patient ID and TES examination and displayed directly to expert physicians via a web-based examination portal conducted diagnostic feature annotation of de-identified images and videos. This password-protected secure interface was developed using web technologies (HTML, JavaScript, node.js) for this purpose and displayed an image or video for one patient at a time for a given examination. Annotators were able to mark specific features in the videos by drawing boxes around them that paused that specific frame, assign an overall score of 1 (best) to 5 (worst) for the entire video, and to write clinical features that were present for specific frames or the entire video (**Supplementary Fig 2**). A panel of at least three physicians for each type of examination was assembled and independently of each other remotely annotated the data facilitated by the web interface. Due to the greater quantity of Microsoft Kinect videos, three physician-trained raters annotated all the videos, and then an expert physician ratified their labels. The interface for optic nerve videos used a previously described Disc Damage Likelihood Scale (DDLS) scale for glaucoma screening [29]. The majority ratings for each subject were computed for all TES tests. For subjects with no majority rating, the lesser of the tied ratings was chosen to not overstate the prevalence of diagnosed illnesses. Results from each test were analyzed for cross-correlations with self-reported medical history responses, age and sex. Clinical findings for individuals who were tested at all six screening kiosks were also analyzed to generate population health profiles. Efficacy of routine health screenings vs. TES to identify at-risk or sick individuals examined during the study is discussed in the manuscript. Conditions outside the normal range identified by physicians for each TES test are as follows. Oral imaging: caries, missing teeth, periodontal disease;

1  
2 108 tympanic membrane imaging: perforated eardrum, effusion; optic nerve head photography: width of optic rim 0.01-0.1;  
3 109 coordination analyses: abnormal finger-nose test.  
4 110

5 111 **Statistical methods:** Fisher's exact test was used to determine statistically significant correlations between diagnoses using  
6 112 TES or routine health screenings and number, age, sex and questionnaire responses of participating subjects. The significance  
7 113 threshold was set at  $p < 0.05$ . To determine in **Supplementary Table 7** whether high BMI was statistically more prevalent in  
8 114 one particular age cohort (out of a total of four age groups), we calculated four proportions representing the number of  
9 115 subjects in a specific age cohort who had high BMI compared to the total number of subjects in that age cohort. Each  
10 116 proportion was compared pairwise using Fisher's exact test, which reported  $p$ -values of 0.0014 and 0.0052 when comparing  
11 117 the proportion from the middle age cohort to the proportions from the young adult and old age cohorts, respectively. In  
12 118 **Supplementary Table 8** to determine that there is a statistically significant correlation between a subject being measured for  
13 119 high BMI and responding that they wear glasses, we calculated two proportions: 1) the number of subjects who had high  
14 120 BMI and said they wear glasses (115) compared to the total number of subjects with high BMI (196), and 2) the number of  
15 121 subjects who did not have high BMI and said they wear glasses (132) compared to the number of subjects who did not have  
16 122 high BMI regardless of whether they wear glasses (298). Fisher's exact test reported a  $p$ -value of 0.0024 when comparing  
17 123 these proportions, so we conclude that the correlation between high BMI and wearing glasses is significant. Analyses were  
18 124 performed on groups of subjects who completed each individual test to avoid considering subjects who did not have that test  
19 125 performed.  
20 126  
21  
22  
23  
24  
25  
26  
27  
28  
29  
30  
31  
32  
33  
34  
35  
36  
37  
38  
39  
40  
41  
42  
43  
44  
45  
46  
47  
48  
49  
50  
51  
52  
53  
54  
55  
56  
57  
58  
59  
60

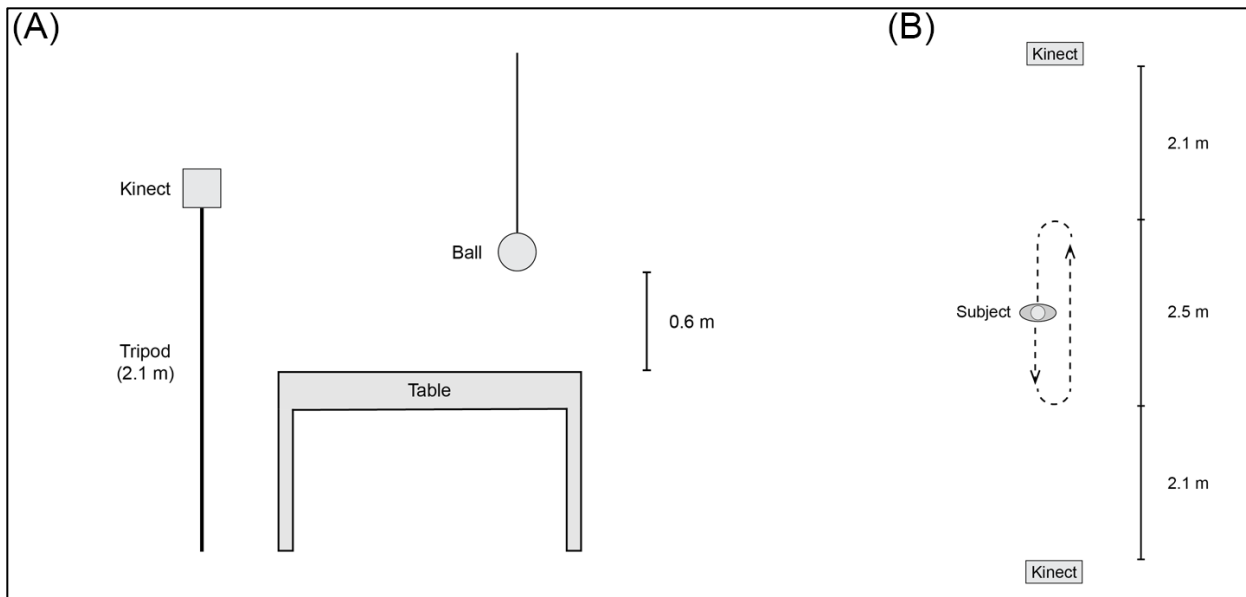

**Supplementary Fig 1.** Diagram of Microsoft Kinect placement for gait and coordination screening tests.

(A) Finger-nose test, from the side. Both the Kinect and ball are centered over the table with the patient facing the ball and the Kinect.

(B) Gait test, top-down. Both Kinects are 1 m off the ground and the subject walks in a straight line between them.

**Subject ID: 1**

Please select eye health of subject using Disc Damage Likelihood scale!

- 0 Narrowest width of rim 0.3 - 0.5 (Excellent)
- 1 Narrowest width of rim 0.2 - 0.29
- 2 Narrowest width of rim 0.1 - 0.19
- 3 Narrowest width of rim 0.01 - 0.1
- 4 No rim < 45°
- 5 No rim 45° - 90°
- 6 No rim 91° - 180°
- 7 No rim > 181° (Worst)

**Table of Annotations:**

In case of issues, Please hit refresh!

Frame Normal Annotation Add / Remove ?

[Instructions](#) [Logout](#)

Previous Save! Replay Next

Normal  Abnormal  Frame no [0]

Comment  Add Annotation

**Subject ID: 35**

Please select overall health of subject from this video!

- 1 (Excellent)
- 2
- 3
- 4
- 5 (Worst)

**Table of Annotations:**

In case of issues, Please hit refresh!

Frame Normal Annotation Add / Remove ?

[Instructions](#) [Logout](#)

Previous Save! Replay Next

Normal  Abnormal  Frame no [117]

Comment  Add Annotation

**Subject ID: 5**

Please select overall health of subject from this video!

- 1 (Excellent)
- 2
- 3
- 4
- 5 (Worst)

**Table of Annotations:**

In case of issues, Please hit refresh!

Frame Normal Annotation Add / Remove ?

[Instructions](#) [Logout](#)

Previous Save! Replay Next

Normal  Abnormal  Frame no [78]

Comment  Add Annotation

**Subject ID: 237**

Please select overall health of subject from this video!

- 1. (Best) Healthy teeth and gums, with no visible signs of plaque, caries and gingivitis/bleeding.
- 2. Dental plaque visible on several teeth.
- 3. Plaque + mild inflammation of gums, maybe some early carious lesions
- 4. Plaque + calculus, early gingivitis, mild localized bleeding
- 5. Calculus + tartar, loss of several teeth, prevalent decay, profound gingivitis, bleeding, early stage periodontal disease.
- 6. (Worst) Loss of several teeth, advanced periodontal disease, profound decay etc.

**Permanent Teeth**

**Supplementary Fig 2.** Web interfaces for remote annotation used by physician experts for clinical evaluations. Clockwise from top left: retinal scan, tympanic membrane imaging, gait and coordination tests, oral imaging

1  
2  
3  
4  
5  
6  
7  
8  
9  
10  
11  
12  
13  
14  
15  
16  
17  
18  
19  
20  
21  
22

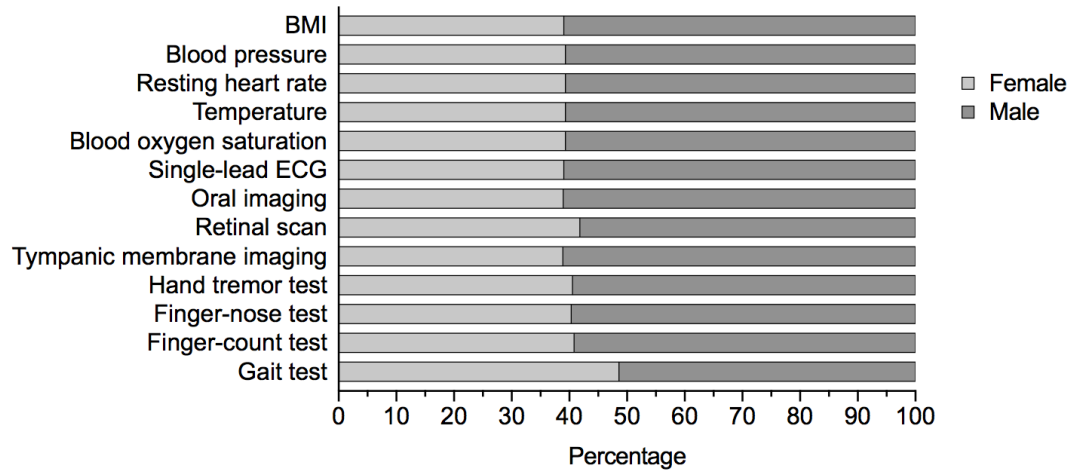

Supplementary Fig 3. Percentage of test populations of each gender.

136  
137  
138  
139  
140  
141  
142  
143  
144  
145

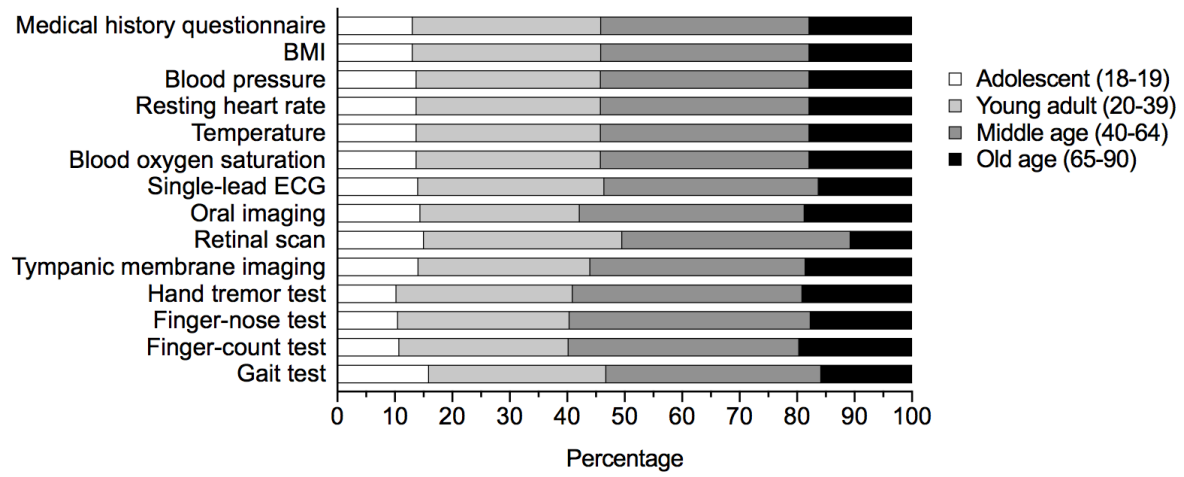

Supplementary Fig 4. Percentage of test populations in each age cohort. Age ranges for each cohort are in parentheses.

Supplementary Table 1. Test populations divided by gender and age cohorts.

|                               | Adolescent (18-19) |      |       | Young adult (20-39) |      |       | Middle age (40-64) |      |       | Old age (65-90) |      |       |
|-------------------------------|--------------------|------|-------|---------------------|------|-------|--------------------|------|-------|-----------------|------|-------|
|                               | Female             | Male | Total | Female              | Male | Total | Female             | Male | Total | Female          | Male | Total |
| Medical history               | 39                 | 26   | 65    | 64                  | 88   | 152   | 73                 | 115  | 188   | 17              | 72   | 89    |
| Body mass index               | 39                 | 26   | 65    | 64                  | 88   | 152   | 73                 | 115  | 188   | 17              | 72   | 89    |
| Blood pressure                | 38                 | 25   | 63    | 56                  | 81   | 137   | 69                 | 104  | 173   | 16              | 66   | 82    |
| Resting heart rate            | 38                 | 25   | 63    | 56                  | 81   | 137   | 69                 | 104  | 173   | 16              | 66   | 82    |
| Temperature                   | 38                 | 25   | 63    | 56                  | 81   | 137   | 69                 | 104  | 173   | 16              | 66   | 82    |
| Blood oxygen saturation       | 38                 | 25   | 63    | 56                  | 81   | 137   | 69                 | 104  | 173   | 16              | 66   | 82    |
| Single-lead electrocardiogram | 36                 | 25   | 61    | 58                  | 81   | 139   | 60                 | 100  | 160   | 14              | 56   | 70    |
| Oral imaging                  | 37                 | 22   | 59    | 43                  | 71   | 114   | 65                 | 96   | 161   | 15              | 62   | 77    |
| Retinal scan                  | 37                 | 23   | 60    | 61                  | 79   | 140   | 63                 | 97   | 160   | 8               | 36   | 44    |
| Tympanic membrane imaging     | 30                 | 9    | 39    | 35                  | 52   | 87    | 49                 | 80   | 129   | 12              | 57   | 69    |
| Hand tremor test              | 24                 | 8    | 32    | 41                  | 55   | 96    | 50                 | 75   | 125   | 12              | 48   | 60    |
| Finger-nose test              | 24                 | 8    | 32    | 37                  | 54   | 91    | 50                 | 78   | 128   | 12              | 42   | 54    |
| Finger-count test             | 24                 | 8    | 32    | 36                  | 52   | 88    | 49                 | 71   | 120   | 13              | 46   | 59    |
| Gait test                     | 30                 | 4    | 34    | 33                  | 33   | 66    | 34                 | 46   | 80    | 7               | 27   | 34    |

Age ranges in years for each age cohort are in parentheses.



**Supplementary Table 2. Gender breakdown of self-reported medical history.**

|                                       | Female (n=193) | Male (n=301) | Total (n=494) |
|---------------------------------------|----------------|--------------|---------------|
| Glasses                               | 54.9           | 46.8         | 50.0          |
| Dental                                | 21.2           | 29.2         | 26.1          |
| Swollen joints                        | 25.4           | 25.2         | 25.3          |
| Hearing                               | 17.1           | 24.9         | 21.9          |
| Family history of diabetes            | 22.3           | 18.3         | 19.8          |
| Leg cramps                            | 19.7           | 17.9         | 18.6          |
| Family history of high blood pressure | 21.2           | 12.6         | 16.0          |
| Fatigue                               | 15.5           | 15.6         | 15.6          |
| Acidity                               | 20.2           | 11.3         | 14.8          |
| Tiredness                             | 13.0           | 15.0         | 14.2          |
| Tobacco addiction                     | 1.6            | 17.6         | 11.3          |
| Surgery                               | 9.8            | 10.0         | 9.9           |
| Difficulty walking                    | 10.4           | 9.6          | 9.9           |
| High blood pressure                   | 10.4           | 8.0          | 8.9           |
| Diabetes                              | 6.7            | 8.6          | 7.9           |
| Snore Loudly                          | 4.7            | 9.3          | 7.5           |
| High blood pressure treatment         | 7.3            | 5.6          | 6.3           |
| Environmental allergies               | 8.3            | 4.3          | 5.9           |
| Sleepiness                            | 5.2            | 5.6          | 5.5           |
| Medication allergies                  | 6.2            | 4.7          | 5.3           |
| Asthma                                | 4.7            | 5.0          | 4.9           |
| Smoking addiction                     | 0.0            | 7.6          | 4.7           |
| Family history of cardiac diseases    | 3.1            | 3.3          | 3.2           |
| Family history of asthma              | 3.1            | 3.0          | 3.0           |
| Thyroid                               | 5.7            | 1.0          | 2.8           |
| Self-medication                       | 1.0            | 4.0          | 2.8           |
| Jewelry allergies                     | 6.2            | 0.0          | 2.4           |
| Past skin infection                   | 3.1            | 2.0          | 2.4           |
| Family history of thyroid disease     | 2.1            | 2.3          | 2.2           |
| Cardiac treatment                     | 1.0            | 2.7          | 2.0           |
| Stop breathing during sleep           | 1.0            | 2.3          | 1.8           |
| Oral infection                        | 1.6            | 2.0          | 1.8           |
| Kidney disorder                       | 2.1            | 1.3          | 1.6           |
| Skin problem                          | 1.0            | 2.0          | 1.6           |
| Skin infection                        | 0.5            | 2.0          | 1.4           |
| Food allergies                        | 1.6            | 1.3          | 1.4           |
| Hyperactivity                         | 2.1            | 1.0          | 1.4           |
| Cardiovascular                        | 0.5            | 1.7          | 1.2           |
| Migraine                              | 2.1            | 0.7          | 1.2           |
| Low blood pressure                    | 2.6            | 0.3          | 1.2           |
| Family history of stroke              | 2.1            | 0.3          | 1.0           |
| Past ear infection                    | 0.5            | 1.0          | 0.8           |
| Family history of eye disease         | 0.5            | 1.0          | 0.8           |
| Heart attack                          | 0.0            | 1.3          | 0.8           |
| Material allergies                    | 1.0            | 0.7          | 0.8           |
| Anxiety                               | 0.5            | 1.0          | 0.8           |
| Injury in past 6 months               | 0.5            | 1.0          | 0.8           |
| Family history of depression          | 1.0            | 0.3          | 0.6           |
| Coronary bypass surgery               | 0.0            | 1.0          | 0.6           |
| Attention deficit disorder            | 1.0            | 0.3          | 0.6           |
| Drinking addiction                    | 0.0            | 1.0          | 0.6           |
| Eye treatment                         | 0.5            | 0.3          | 0.4           |
| Family history of skin disease        | 0.5            | 0.3          | 0.4           |
| Memory loss                           | 1.0            | 0.0          | 0.4           |
| Ear treatment                         | 0.5            | 0.3          | 0.4           |
| Lung diseases                         | 0.5            | 0.3          | 0.4           |
| Family history of ear disease         | 0.0            | 0.7          | 0.4           |
| Cancer                                | 0.5            | 0.0          | 0.2           |
| Sexually transmitted disease          | 0.0            | 0.3          | 0.2           |
| Liver disease                         | 0.5            | 0.0          | 0.2           |
| Skin treatment                        | 0.5            | 0.0          | 0.2           |
| Past gastric infection                | 0.0            | 0.3          | 0.2           |
| Depression                            | 0.0            | 0.0          | 0.0           |
| Sleep disorder treatment              | 0.0            | 0.0          | 0.0           |
| Heart murmur                          | 0.0            | 0.0          | 0.0           |
| Past lung infection                   | 0.0            | 0.0          | 0.0           |

Percentage of total population by gender who answered yes to each medical history question.

Supplementary Table 3. Age cohort breakdown of self-reported medical history.

|                                       | Adolescent (18-19) | Young adult (20-39) | Middle age (40-64) | Old age (65-90) |
|---------------------------------------|--------------------|---------------------|--------------------|-----------------|
| Glasses                               | 11                 | 21                  | 47                 | 21              |
| Dental                                | 3                  | 22                  | 53                 | 22              |
| Swollen joints                        | 0                  | 10                  | 51                 | 38              |
| Hearing                               | 1                  | 7                   | 50                 | 42              |
| Family history of diabetes            | 17                 | 44                  | 34                 | 5               |
| Leg cramps                            | 0                  | 15                  | 47                 | 38              |
| Family history of high blood pressure | 18                 | 46                  | 33                 | 4               |
| Fatigue                               | 1                  | 21                  | 55                 | 23              |
| Acidity                               | 5                  | 30                  | 47                 | 18              |
| Tiredness                             | 3                  | 21                  | 53                 | 23              |
| Tobacco addiction                     | 0                  | 18                  | 46                 | 36              |
| Surgery                               | 8                  | 18                  | 37                 | 37              |
| Difficulty walking                    | 0                  | 2                   | 49                 | 49              |
| High blood pressure                   | 0                  | 9                   | 57                 | 34              |
| Diabetes                              | 0                  | 15                  | 64                 | 21              |
| Snore Loudly                          | 0                  | 27                  | 65                 | 8               |
| High blood pressure treatment         | 0                  | 6                   | 55                 | 39              |
| Environmental allergies               | 17                 | 41                  | 34                 | 7               |
| Sleepiness                            | 4                  | 7                   | 63                 | 26              |
| Medication allergies                  | 15                 | 15                  | 54                 | 15              |
| Asthma                                | 0                  | 4                   | 67                 | 29              |
| Smoking addiction                     | 0                  | 9                   | 52                 | 39              |
| Family history of cardiac diseases    | 6                  | 38                  | 38                 | 19              |
| Family history of asthma              | 13                 | 13                  | 67                 | 7               |
| Thyroid                               | 0                  | 14                  | 64                 | 21              |
| Self-medication                       | 0                  | 29                  | 50                 | 21              |
| Jewelry allergies                     | 0                  | 33                  | 67                 | 0               |
| Past skin infection                   | 8                  | 25                  | 50                 | 17              |
| Family history of thyroid disease     | 18                 | 55                  | 9                  | 18              |
| Cardiac treatment                     | 0                  | 20                  | 40                 | 40              |
| Stop breathing during sleep           | 0                  | 33                  | 33                 | 33              |
| Oral infection                        | 0                  | 11                  | 67                 | 22              |
| Kidney disorder                       | 13                 | 13                  | 50                 | 25              |
| Skin problem                          | 0                  | 0                   | 50                 | 50              |
| Skin infection                        | 0                  | 29                  | 57                 | 14              |
| Food allergies                        | 0                  | 29                  | 57                 | 14              |
| Hyperactivity                         | 14                 | 29                  | 57                 | 0               |
| Cardiovascular                        | 0                  | 33                  | 67                 | 0               |
| Migraine                              | 17                 | 83                  | 0                  | 0               |
| Low blood pressure                    | 17                 | 17                  | 67                 | 0               |
| Family history of stroke              | 20                 | 60                  | 20                 | 0               |
| Past ear infection                    | 0                  | 75                  | 0                  | 25              |
| Family history of eye disease         | 0                  | 75                  | 25                 | 0               |
| Heart attack                          | 0                  | 25                  | 25                 | 50              |
| Material allergies                    | 0                  | 75                  | 25                 | 0               |
| Anxiety                               | 0                  | 50                  | 50                 | 0               |
| Injury in past 6 months               | 25                 | 0                   | 75                 | 0               |
| Family history of depression          | 33                 | 67                  | 0                  | 0               |
| Coronary bypass surgery               | 0                  | 0                   | 33                 | 67              |
| Attention deficit disorder            | 0                  | 0                   | 100                | 0               |
| Drinking addiction                    | 0                  | 0                   | 67                 | 33              |
| Eye treatment                         | 0                  | 0                   | 0                  | 100             |
| Family history of skin disease        | 0                  | 50                  | 50                 | 0               |
| Memory loss                           | 0                  | 0                   | 50                 | 50              |
| Ear treatment                         | 0                  | 0                   | 100                | 0               |
| Lung diseases                         | 0                  | 0                   | 50                 | 50              |
| Family history of ear disease         | 0                  | 50                  | 0                  | 50              |
| Cancer                                | 0                  | 0                   | 100                | 0               |
| Sexually transmitted disease          | 0                  | 100                 | 0                  | 0               |
| Liver disease                         | 0                  | 0                   | 100                | 0               |
| Skin treatment                        | 0                  | 100                 | 0                  | 0               |
| Past gastric infection                | 0                  | 0                   | 100                | 0               |
| Depression                            | 0                  | 0                   | 0                  | 0               |
| Sleep disorder treatment              | 0                  | 0                   | 0                  | 0               |
| Heart murmur                          | 0                  | 0                   | 0                  | 0               |
| Past lung infection                   | 0                  | 0                   | 0                  | 0               |

Distribution of subjects, in percentages, who responded yes to a medical history question across age cohorts.  
Age ranges in years for each age cohort are in parentheses.



Supplementary Table 4. Percentage of subjects in each age cohort who responded yes to a medical history question.

|                                       | Adolescent (18-19) | Young adult (20-39) | Middle age (40-64) | Old age (65-90) |
|---------------------------------------|--------------------|---------------------|--------------------|-----------------|
| Glasses                               | 43                 | 34                  | 62                 | 57              |
| Dental                                | 6                  | 18                  | 36                 | 33              |
| Swollen joints                        | 0                  | 9                   | 34                 | 54              |
| Hearing                               | 2                  | 5                   | 29                 | 51              |
| Family history of diabetes            | 26                 | 28                  | 18                 | 6               |
| Leg cramps                            | 0                  | 9                   | 23                 | 39              |
| Family history of high blood pressure | 22                 | 24                  | 14                 | 3               |
| Fatigue                               | 2                  | 11                  | 22                 | 20              |
| Acidity                               | 6                  | 14                  | 18                 | 15              |
| Tiredness                             | 3                  | 10                  | 20                 | 18              |
| Tobacco addiction                     | 0                  | 7                   | 14                 | 22              |
| Surgery                               | 6                  | 6                   | 10                 | 20              |
| Difficulty walking                    | 0                  | 1                   | 13                 | 27              |
| High blood pressure                   | 0                  | 3                   | 13                 | 17              |
| Diabetes                              | 0                  | 4                   | 13                 | 9               |
| Snore Loudly                          | 0                  | 7                   | 13                 | 3               |
| High blood pressure treatment         | 0                  | 1                   | 9                  | 13              |
| Environmental allergies               | 8                  | 8                   | 5                  | 2               |
| Sleepiness                            | 2                  | 1                   | 9                  | 8               |
| Medication allergies                  | 6                  | 3                   | 7                  | 4               |
| Asthma                                | 0                  | 1                   | 9                  | 8               |
| Smoking addiction                     | 0                  | 1                   | 6                  | 10              |
| Family history of cardiac diseases    | 2                  | 4                   | 3                  | 3               |
| Family history of asthma              | 3                  | 1                   | 5                  | 1               |
| Thyroid                               | 0                  | 1                   | 5                  | 3               |
| Self-medication                       | 0                  | 3                   | 4                  | 3               |
| Jewelry allergies                     | 0                  | 3                   | 4                  | 0               |
| Past skin infection                   | 2                  | 2                   | 3                  | 2               |
| Family history of thyroid disease     | 3                  | 4                   | 1                  | 2               |
| Cardiac treatment                     | 0                  | 1                   | 2                  | 4               |
| Stop breathing during sleep           | 0                  | 2                   | 2                  | 3               |
| Oral infection                        | 0                  | 1                   | 3                  | 2               |
| Kidney disorder                       | 2                  | 1                   | 2                  | 2               |
| Skin problem                          | 0                  | 0                   | 2                  | 4               |
| Skin infection                        | 0                  | 1                   | 2                  | 1               |
| Food allergies                        | 0                  | 1                   | 2                  | 1               |
| Hyperactivity                         | 2                  | 1                   | 2                  | 0               |
| Cardiovascular                        | 0                  | 1                   | 2                  | 0               |
| Migraine                              | 2                  | 3                   | 0                  | 0               |
| Low blood pressure                    | 2                  | 0.7                 | 2                  | 0               |
| Family history of stroke              | 2                  | 2                   | 1                  | 0               |
| Past ear infection                    | 0                  | 2                   | 0                  | 1               |
| Family history of eye disease         | 0                  | 2                   | 0.5                | 0               |
| Heart attack                          | 0                  | 0.7                 | 0.5                | 2               |
| Material allergies                    | 0                  | 2                   | 0.5                | 0               |
| Anxiety                               | 0                  | 1                   | 1                  | 0               |
| Injury in past 6 months               | 2                  | 0                   | 2                  | 0               |
| Family history of depression          | 2                  | 1                   | 0                  | 0               |
| Coronary bypass surgery               | 0                  | 0                   | 0.5                | 2               |
| Attention deficit disorder            | 0                  | 0                   | 2                  | 0               |
| Drinking addiction                    | 0                  | 0                   | 1                  | 1               |
| Eye treatment                         | 0                  | 0                   | 0                  | 2               |
| Family history of skin disease        | 0                  | 0.7                 | 0.5                | 0               |
| Memory loss                           | 0                  | 0                   | 0.5                | 1               |
| Ear treatment                         | 0                  | 0                   | 1                  | 0               |
| Lung diseases                         | 0                  | 0                   | 0.5                | 1               |
| Family history of ear disease         | 0                  | 0.7                 | 0                  | 1               |
| Cancer                                | 0                  | 0                   | 0.5                | 0               |
| Sexually transmitted disease          | 0                  | 0.7                 | 0                  | 0               |
| Liver disease                         | 0                  | 0                   | 0.5                | 0               |
| Skin treatment                        | 0                  | 0.7                 | 0                  | 0               |
| Past gastric infection                | 0                  | 0                   | 0.5                | 0               |
| Depression                            | 0                  | 0                   | 0                  | 0               |
| Sleep disorder treatment              | 0                  | 0                   | 0                  | 0               |
| Heart murmur                          | 0                  | 0                   | 0                  | 0               |
| Past lung infection                   | 0                  | 0                   | 0                  | 0               |

Age ranges in years for each age cohort are in parentheses.

**Supplementary Table 5. Numbers of subjects in each age cohort identified by routine health screenings.**

|          | Adolescent (18-19) |      |       | Young adult (20-39) |      |       | Middle age (40-64) |      |       | Old age (65-90) |      |       |
|----------|--------------------|------|-------|---------------------|------|-------|--------------------|------|-------|-----------------|------|-------|
|          | Female             | Male | Total | Female              | Male | Total | Female             | Male | Total | Female          | Male | Total |
| High BMI | 10                 | 11   | 21    | 15                  | 35   | 50    | 43                 | 57   | 100   | 7               | 18   | 25    |
| Low BMI  | 11                 | 6    | 17    | 19                  | 9    | 28    | 7                  | 13   | 20    | 5               | 19   | 24    |
| High BP  | 0                  | 1    | 1     | 4                   | 12   | 16    | 15                 | 30   | 45    | 7               | 19   | 26    |
| Low BP   | 1                  | 0    | 1     | 2                   | 0    | 2     | 0                  | 1    | 1     | 0               | 0    | 0     |

Age ranges in years for each age cohort are in parentheses.

**Supplementary Table 6. Percentages of subjects with each condition in our study and in each encompassing region from the National Family and Health Survey 4 (NFHS4).**

|                   | High BMI |       | Low BMI |       | High BP |       |
|-------------------|----------|-------|---------|-------|---------|-------|
|                   | Female   | Male  | Female  | Male  | Female  | Male  |
| Our study         | 38.9%    | 40.2% | 21.8%   | 15.6% | 14.5%   | 22.5% |
| NFHS4 India       | 20.7%    | 18.6% | 22.9%   | 20.2% | 8.8%    | 13.6% |
| NFHS4 Maharashtra | 23.4%    | 23.8% | 23.5%   | 19.1% | 9.1%    | 15.9% |
| NFHS4 Nashik      | 22.9%    | 23.7% | 25.8%   | 16.8% | 5.7%    | 11%   |

**Supplementary Table 7. Statistically significant prevalence of clinical conditions identified by routine health screenings across age cohorts.**

| Condition | More prevalent in | Than in     | <i>p</i> -value | More prevalent cohort           |               | Less prevalent cohort           |               |
|-----------|-------------------|-------------|-----------------|---------------------------------|---------------|---------------------------------|---------------|
|           |                   |             |                 | No. with condition (percentage) | No. in cohort | No. with condition (percentage) | No. in cohort |
| High BMI  | Middle age        | Young adult | 0.0014          | 100 (59.5)                      | 168           | 50 (32.9)                       | 152           |
| High BMI  | Middle age        | Old age     | 0.0052          | 100 (59.5)                      | 168           | 25 (28.1)                       | 89            |
| High BP   | Young adult       | Adolescent  | 0.0147          | 16 (11.9)                       | 135           | 1 (1.5)                         | 65            |
| High BP   | Middle age        | Adolescent  | <0.0001         | 45 (26.2)                       | 172           | 1 (1.5)                         | 65            |
| High BP   | Middle age        | Young adult | 0.0023          | 45 (26)                         | 172           | 16 (10.5)                       | 152           |
| High BP   | Old age           | Adolescent  | <0.0001         | 26 (31.7)                       | 82            | 1 (1.5)                         | 65            |
| High BP   | Old age           | Young adult | 0.0006          | 52 (66.7)                       | 82            | 16 (10.5)                       | 152           |

Age ranges in years for each cohort: 18-19 for adolescents, 20-39 for young adults, 40-64 for middle age, and 65-90 for old age.

**Supplementary Table 8. Number of subjects with a routine health screening condition and responded yes to a medical history question.**

| Condition | No. with condition | Glasses | Dental | Swollen joints | Hearing | FH diabetes | FH high BP | Tobacco | Difficulty walking | High BP | Diabetes | High BP Rx | Asthma | Smoking | FH cardiac | Cardiac Rx | Cardiovascular | Low BP | FH stroke | FH eye disease | Heart attack | Coronary bypass | Drinking | Eye treatment | Memory loss | Ear treatment | FH ear disease | Cancer |
|-----------|--------------------|---------|--------|----------------|---------|-------------|------------|---------|--------------------|---------|----------|------------|--------|---------|------------|------------|----------------|--------|-----------|----------------|--------------|-----------------|----------|---------------|-------------|---------------|----------------|--------|
| High BMI  | 196                | 115*    | 48     | 52             | 38      | 48*         | 41*        | 23      | 19                 | 26*     | 18       | 17         | 9      | 3**     | 5          | 5          | 1              | 1      | 1         | 3              | 2            | 1               | 1        | 0             | 2           | 2             | 1              | 0      |
| Low BMI   | 89                 | 39      | 21     | 23             | 25      | 11          | 10         | 16*     | 12                 | 4       | 6        | 4          | 4      | 9*      | 1          | 1          | 0              | 2      | 1         | 0              | 0            | 0               | 1        | 0             | 0           | 0             | 0              |        |
| High BP   | 88                 | 54      | 24     | 30*            | 25      | 19          | 11         | 11      | 14*                | 17*     | 15*      | 14*        | 2      | 4       | 4          | 4          | 3              | 0      | 0         | 1              | 2            | 1               | 0        | 1             | 1           | 1             | 1              | 0      |
| Low BP    | 4                  | 3       | 1      | 1              | 1       | 2           | 1          | 0       | 1                  | 0       | 0        | 0          | 0      | 1       | 0          | 0          | 0              | 0      | 0         | 0              | 0            | 0               | 0        | 0             | 0           | 0             | 0              | 0      |

Total populations reflect the number of subjects with the particular condition in that row. Multiple subjects were associated with more than one condition or questionnaire response.

\*  $p < 0.05$ , subjects are more likely to have responded yes to the column's question and have the routine health screening abnormality.

\*\*  $p < 0.05$ , subjects are less likely to have responded yes to the column's question and have the routine health screening abnormality.

**Supplementary Table 9. Statistically significant correlations between routine health screening conditions and self-reported medical history.**

| Condition | Medical History    | <i>p</i> -value | Subjects with routine screening condition |                    | Subjects without routine screening condition |                       |
|-----------|--------------------|-----------------|-------------------------------------------|--------------------|----------------------------------------------|-----------------------|
|           |                    |                 | No. responded yes (percentage)            | No. with condition | No. responded yes (percentage)               | No. without condition |
| High BMI  | Glasses            | 0.0024          | 115 (58.7)                                | 196                | 132 (44.3)                                   | 298                   |
| High BMI  | FH diabetes        | 0.0384          | 48 (24.5)                                 | 196                | 50 (16.8)                                    | 298                   |
| High BMI  | FH High BP         | 0.0173          | 41 (20.9)                                 | 196                | 38 (12.8)                                    | 298                   |
| Low BMI   | Tobacco addiction  | 0.0406          | 16 (18.0)                                 | 89                 | 40 (9.9)                                     | 405                   |
| High BMI  | High BP            | 0.0091          | 26 (13.3)                                 | 196                | 18 (6.0)                                     | 298                   |
| Low BMI   | Smoking            | 0.0122          | 9 (10.1)                                  | 89                 | 14 (3.5)                                     | 405                   |
| High BMI  | Smoking            | 0.0077          | 3 (1.5)                                   | 196                | 20 (6.7)                                     | 298                   |
| High BP   | Glasses            | 0.0251          | 60 (68.2)                                 | 88                 | 179 (48.8)                                   | 367                   |
| High BP   | Swollen joints     | 0.0425          | 30 (34.1)                                 | 88                 | 89 (24.3)                                    | 367                   |
| High BP   | Difficulty walking | 0.0483          | 14 (15.9)                                 | 88                 | 33 (9.0)                                     | 367                   |
| High BP   | High BP            | 0.0006          | 17 (19.3)                                 | 88                 | 24 (6.5)                                     | 367                   |
| High BP   | Diabetes           | 0.0004          | 15 (17.0)                                 | 88                 | 22 (6.0)                                     | 367                   |
| High BP   | High BP Rx         | 0.0002          | 14 (15.9)                                 | 88                 | 17 (4.6)                                     | 367                   |

**Supplementary Table 10. Numbers of subjects in each age cohort identified by technology-enabled screenings.**

|                         | Adolescent (18-19) |      |       | Young adult (20-39) |      |       | Middle age (40-64) |      |       | Old age (65-90) |      |       |
|-------------------------|--------------------|------|-------|---------------------|------|-------|--------------------|------|-------|-----------------|------|-------|
|                         | Female             | Male | Total | Female              | Male | Total | Female             | Male | Total | Female          | Male | Total |
| Blood oxygen saturation | 0                  | 2    | 2     | 2                   | 2    | 4     | 3                  | 5    | 8     | 0               | 5    | 5     |
| Single-lead ECG         | 0                  | 1    | 1     | 0                   | 0    | 0     | 0                  | 0    | 0     | 0               | 0    | 0     |
| Oral                    | 17                 | 5    | 22    | 22                  | 30   | 52    | 55                 | 65   | 120   | 15              | 51   | 66    |
| Retinal                 | 2                  | 1    | 3     | 2                   | 7    | 9     | 9                  | 8    | 17    | 4               | 9    | 13    |
| Tympanic membrane       | 0                  | 0    | 0     | 1                   | 2    | 3     | 4                  | 0    | 4     | 0               | 2    | 2     |
| Hand tremor test        | 0                  | 0    | 0     | 0                   | 0    | 0     | 0                  | 0    | 0     | 0               | 0    | 0     |
| Finger-nose test        | 0                  | 0    | 0     | 0                   | 0    | 0     | 0                  | 2    | 2     | 0               | 1    | 1     |
| Finger-count test       | 0                  | 0    | 0     | 0                   | 0    | 0     | 0                  | 0    | 0     | 0               | 0    | 0     |
| Gait test               | 0                  | 0    | 0     | 0                   | 1    | 1     | 0                  | 1    | 1     | 1               | 2    | 3     |

Age ranges in years for each age cohort are in parentheses.

**Supplementary Table 11. Distribution of unhealthy subjects by clinical condition identified in each technology-enabled screening test.**

| Test              | Condition             | No. with condition (percent) | No. screened by test |
|-------------------|-----------------------|------------------------------|----------------------|
| Oral              | Carious               | 156 (38.0)                   | 411                  |
| Oral              | Missing tooth         | 115 (28.0)                   | 411                  |
| Oral              | Edentulous            | 35 (8.5)                     | 411                  |
| Oral              | Periodontal disease   | 61 (14.8)                    | 411                  |
| Retinal           | Width of rim 0.01-0.1 | 9 (2.2)                      | 404                  |
| Tympanic membrane | Perforated eardrum    | 25 (7.7)                     | 324                  |
| Tympanic membrane | Effusion              | 20 (6.2)                     | 324                  |
| Finger-nose       | Abnormal              | 3 (1.0)                      | 305                  |
| Gait              | Abnormal              | 5 (2.3)                      | 214                  |

**Supplementary Table 12. Number of subjects identified with clinical conditions in two technology-enabled screening tests.**

|                   | Tympanic membrane | Retinal | Oral | Finger-nose | Gait |
|-------------------|-------------------|---------|------|-------------|------|
| Low blood oxygen  | 1                 | 1       | 13   | 0           | 1    |
| Tympanic membrane |                   | 0       | 26   | 2           | 2    |
| Retinal           |                   |         | 8    | 0           | 0    |
| Oral              |                   |         |      | 2           | 4    |
| Finger-nose       |                   |         |      |             | 0    |

**Supplementary Table 13. Percentages of subjects identified with a clinical condition by a technology-enabled screening test and a routine health screening abnormality.**

| Abnormality       | High BMI | Low BMI | High BP | Low BP |
|-------------------|----------|---------|---------|--------|
| Low blood oxygen  | 21.1     | 42.1*   | 10.5    | 5.3    |
| Tympanic Membrane | 31.0     | 31.0    | 31.7    | 0.0    |
| Retinal           | 44.4     | 11.1    | 11.1    | 0.0    |
| Oral              | 40.4     | 17.3    | 20.6    | 0.8    |
| Finger-nose       | 0.0      | 33.3    | 0.0     | 0.0    |
| Gait              | 20.0     | 40.0    | 20.0    | 0.0    |

\*  $p < 0.05$ , subjects are more likely to have the routine health screening abnormality if they have the technology-enabled screening condition.

**Supplementary Table 14. Statistically significant correlations between conditions identified by a technology-enabled screening test and self-reported medical history.**

| Abnormality       | Medical History    | <i>p</i> -value | Subjects with condition        |                    | Subjects without condition     |                       |
|-------------------|--------------------|-----------------|--------------------------------|--------------------|--------------------------------|-----------------------|
|                   |                    |                 | No. responded yes (percentage) | No. with condition | No. responded yes (percentage) | No. without condition |
| Low blood oxygen  | Smoking            | 0.0087          | 4 (21.1)                       | 19                 | 15 (3.4)                       | 436                   |
| Tympanic Membrane | Hearing difficulty | 0.0053          | 17 (40.5)                      | 42                 | 65 (23.0)                      | 282                   |
| Retinal           | Hearing difficulty | 0.0500          | 4 (44.4)                       | 9                  | 65 (16.5)                      | 395                   |
| Retinal           | Difficulty walking | 0.0298          | 3 (33.3)                       | 9                  | 30 (7.6)                       | 395                   |
| Oral              | Glasses            | 0.0195          | 145 (56.9)                     | 255                | 70 (44.9)                      | 156                   |
| Oral              | Dental problems    | 0.0043          | 82 (32.2)                      | 255                | 30 (19.2)                      | 156                   |
| Oral              | Swollen joints     | 0.0002          | 85 (33.3)                      | 255                | 26 (16.7)                      | 156                   |
| Oral              | Hearing difficulty | 0.0017          | 72 (28.2)                      | 255                | 23 (14.7)                      | 156                   |
| Oral              | FH high BP         | 0.0172*         | 31 (12.2)                      | 255                | 33 (21.2)                      | 156                   |
| Oral              | Difficulty walking | 0.0089          | 36 (14.1)                      | 255                | 9 (5.8)                        | 156                   |
| Oral              | High BP            | 0.0339          | 30 (11.8)                      | 255                | 8 (5.1)                        | 156                   |
| Oral              | High BP Rx         | 0.0490          | 24 (9.4)                       | 255                | 6 (3.8)                        | 156                   |
| Oral              | Cardiac Rx         | 0.0267          | 8 (3.1)                        | 255                | 0 (0)                          | 156                   |
| Finger-nose       | Difficulty walking | 0.0009          | 3 (100)                        | 3                  | 27 (8.99)                      | 302                   |
| Finger-nose       | Swollen joints     | 0.0159          | 3 (100)                        | 3                  | 80 (26.0)                      | 302                   |
| Gait              | Teeth problems     | 0.0179          | 4 (80.0)                       | 5                  | 53 (25.4)                      | 209                   |
| Gait              | Swollen joints     | 0.0159          | 4 (80.0)                       | 5                  | 45 (21.5)                      | 209                   |

**Supplementary Table 15. Age cohort and gender of subjects identified with any routine health screening or any technology-enabled screening abnormality.**

|                                          | Adolescent (18-19) |      | Young adult (20-39) |      | Middle age (40-64) |      | Old age (65-90) |      | Total (n=111) |
|------------------------------------------|--------------------|------|---------------------|------|--------------------|------|-----------------|------|---------------|
|                                          | Female             | Male | Female              | Male | Female             | Male | Female          | Male |               |
| Routine health screening condition       | 10                 | 0    | 8                   | 19   | 11                 | 21   | 2               | 8    | 79            |
| Technology-enabled screening abnormality | 9                  | 0    | 8                   | 11   | 14                 | 18   | 2               | 8    | 70            |
| Total in age cohort                      | 19                 | 0    | 16                  | 23   | 16                 | 26   | 2               | 9    |               |





STROBE Statement—Checklist of items that should be included in reports of *cohort studies*

| Page(s)             | Item No                      | Recommendation                                                                                                                                                                                    |
|---------------------|------------------------------|---------------------------------------------------------------------------------------------------------------------------------------------------------------------------------------------------|
| 1                   | <b>Title and abstract</b>    | 1                                                                                                                                                                                                 |
|                     |                              | (a) Indicate the study's design with a commonly used term in the title or the abstract                                                                                                            |
| 2                   |                              | (b) Provide in the abstract an informative and balanced summary of what was done and what was found                                                                                               |
| <b>Introduction</b> |                              |                                                                                                                                                                                                   |
| 4                   | Background/rationale         | 2                                                                                                                                                                                                 |
|                     |                              | Explain the scientific background and rationale for the investigation being reported                                                                                                              |
| 4, 5                | Objectives                   | 3                                                                                                                                                                                                 |
|                     |                              | State specific objectives, including any prespecified hypotheses                                                                                                                                  |
| <b>Methods</b>      |                              |                                                                                                                                                                                                   |
| 6                   | Study design                 | 4                                                                                                                                                                                                 |
|                     |                              | Present key elements of study design early in the paper                                                                                                                                           |
| 6                   | Setting                      | 5                                                                                                                                                                                                 |
|                     |                              | Describe the setting, locations, and relevant dates, including periods of recruitment, exposure, follow-up, and data collection                                                                   |
| 6, S2               | Participants                 | 6                                                                                                                                                                                                 |
|                     |                              | (a) Give the eligibility criteria, and the sources and methods of selection of participants. Describe methods of follow-up                                                                        |
| n/a                 |                              | (b) For matched studies, give matching criteria and number of exposed and unexposed                                                                                                               |
| 6, 7, S2, S3        | Variables                    | 7                                                                                                                                                                                                 |
|                     |                              | Clearly define all outcomes, exposures, predictors, potential confounders, and effect modifiers. Give diagnostic criteria, if applicable                                                          |
| 6, 7, S2, S3        | Data sources/<br>measurement | 8*                                                                                                                                                                                                |
|                     |                              | For each variable of interest, give sources of data and details of methods of assessment (measurement). Describe comparability of assessment methods if there is more than one group              |
| 6, S2, S4           | Bias                         | 9                                                                                                                                                                                                 |
|                     |                              | Describe any efforts to address potential sources of bias                                                                                                                                         |
| 6, S2               | Study size                   | 10                                                                                                                                                                                                |
|                     |                              | Explain how the study size was arrived at                                                                                                                                                         |
| 6, S3, S4           | Quantitative variables       | 11                                                                                                                                                                                                |
|                     |                              | Explain how quantitative variables were handled in the analyses. If applicable, describe which groupings were chosen and why                                                                      |
| S3, S4              | Statistical methods          | 12                                                                                                                                                                                                |
|                     |                              | (a) Describe all statistical methods, including those used to control for confounding                                                                                                             |
| S3, S4              |                              | (b) Describe any methods used to examine subgroups and interactions                                                                                                                               |
| 6, 8, 11, 12        |                              | (c) Explain how missing data were addressed                                                                                                                                                       |
| n/a                 |                              | (d) If applicable, explain how loss to follow-up was addressed                                                                                                                                    |
| n/a                 |                              | (e) Describe any sensitivity analyses                                                                                                                                                             |
| <b>Results</b>      |                              |                                                                                                                                                                                                   |
| 18, S7              | Participants                 | 13*                                                                                                                                                                                               |
|                     |                              | (a) Report numbers of individuals at each stage of study—eg numbers potentially eligible, examined for eligibility, confirmed eligible, included in the study, completing follow-up, and analysed |
| 6, S2               |                              | (b) Give reasons for non-participation at each stage                                                                                                                                              |



| <b>Fig 1</b>             |                  |     | (c) Consider use of a flow diagram                                                                                                                                                                           |
|--------------------------|------------------|-----|--------------------------------------------------------------------------------------------------------------------------------------------------------------------------------------------------------------|
| <b>S6, S8</b>            | Descriptive data | 14* | (a) Give characteristics of study participants (eg demographic, clinical, social) and information on exposures and potential confounders                                                                     |
| <b>18</b>                |                  |     | (b) Indicate number of participants with missing data for each variable of interest                                                                                                                          |
| <b>n/a</b>               |                  |     | (c) Summarise follow-up time (eg, average and total amount)                                                                                                                                                  |
| <b>n/a</b>               | Outcome data     | 15* | Report numbers of outcome events or summary measures over time                                                                                                                                               |
| <b>8-12, 19</b>          | Main results     | 16  | (a) Give unadjusted estimates and, if applicable, confounder-adjusted estimates and their precision (eg, 95% confidence interval). Make clear which confounders were adjusted for and why they were included |
| <b>S3</b>                |                  |     | (b) Report category boundaries when continuous variables were categorized                                                                                                                                    |
| <b>n/a</b>               |                  |     | (c) If relevant, consider translating estimates of relative risk into absolute risk for a meaningful time period                                                                                             |
| <b>8-12</b>              | Other analyses   | 17  | Report other analyses done—eg analyses of subgroups and interactions, and sensitivity analyses                                                                                                               |
| <b>Discussion</b>        |                  |     |                                                                                                                                                                                                              |
| <b>13</b>                | Key results      | 18  | Summarise key results with reference to study objectives                                                                                                                                                     |
| <b>15</b>                | Limitations      | 19  | Discuss limitations of the study, taking into account sources of potential bias or imprecision. Discuss both direction and magnitude of any potential bias                                                   |
| <b>13, 15</b>            | Interpretation   | 20  | Give a cautious overall interpretation of results considering objectives, limitations, multiplicity of analyses, results from similar studies, and other relevant evidence                                   |
| <b>15</b>                | Generalisability | 21  | Discuss the generalisability (external validity) of the study results                                                                                                                                        |
| <b>Other information</b> |                  |     |                                                                                                                                                                                                              |
| <b>16</b>                | Funding          | 22  | Give the source of funding and the role of the funders for the present study and, if applicable, for the original study on which the present article is based                                                |

\*Give information separately for exposed and unexposed groups.

**Note:** An Explanation and Elaboration article discusses each checklist item and gives methodological background and published examples of transparent reporting. The STROBE checklist is best used in conjunction with this article (freely available on the Web sites of PLoS Medicine at <http://www.plosmedicine.org/>, Annals of Internal Medicine at <http://www.annals.org/>, and Epidemiology at <http://www.epidem.com/>). Information on the STROBE Initiative is available at <http://www.strobe-statement.org>.

# BMJ Open

## Technology-enabled examinations of cardiac rhythm, optic nerve, oral health, tympanic membrane, gait and coordination evaluated jointly with routine health screenings: An observational study at the 2015 Kumbh Mela in India

|                                 |                                                                                                                                                                                                                                                                                                                                                                                                                                                                                                                                                                                                         |
|---------------------------------|---------------------------------------------------------------------------------------------------------------------------------------------------------------------------------------------------------------------------------------------------------------------------------------------------------------------------------------------------------------------------------------------------------------------------------------------------------------------------------------------------------------------------------------------------------------------------------------------------------|
| Journal:                        | <i>BMJ Open</i>                                                                                                                                                                                                                                                                                                                                                                                                                                                                                                                                                                                         |
| Manuscript ID                   | bmjopen-2017-018774.R2                                                                                                                                                                                                                                                                                                                                                                                                                                                                                                                                                                                  |
| Article Type:                   | Research                                                                                                                                                                                                                                                                                                                                                                                                                                                                                                                                                                                                |
| Date Submitted by the Author:   | 12-Feb-2018                                                                                                                                                                                                                                                                                                                                                                                                                                                                                                                                                                                             |
| Complete List of Authors:       | Shah, Pratik; Massachusetts Institute of Technology, Media Lab<br>Yauney, Gregory; Massachusetts Institute of Technology, Media Arts and Sciences<br>Gupta, Otkrist; Massachusetts Institute of Technology, Media Arts and Sciences<br>Patalano, Vincent; Harvard Medical School, Ophthalmology; Cambridge Health Alliance<br>Mohit, Mrinal; Massachusetts Institute of Technology, Media Arts and Sciences<br>Merchant, Rikin; Karmaveer Bhausaheb Hiray Dental College and Hospital, Global Health<br>Subramanian, S V; Harvard School of Public Health, Department of Society, Human Development and |
| <b>Primary Subject Heading</b>: | Diagnostics                                                                                                                                                                                                                                                                                                                                                                                                                                                                                                                                                                                             |
| Secondary Subject Heading:      | Diagnostics, Global health                                                                                                                                                                                                                                                                                                                                                                                                                                                                                                                                                                              |
| Keywords:                       | PRIMARY CARE, Glaucoma < OPTHALMOLOGY, Telemedicine < BIOTECHNOLOGY & BIOINFORMATICS                                                                                                                                                                                                                                                                                                                                                                                                                                                                                                                    |
|                                 |                                                                                                                                                                                                                                                                                                                                                                                                                                                                                                                                                                                                         |

SCHOLARONE™  
Manuscripts

1  
2 1 Technology-enabled examinations of cardiac rhythm, optic nerve, oral health, tympanic membrane, gait and  
3  
4 2 coordination evaluated jointly with routine health screenings: An observational study at the 2015 Kumbh Mela in  
5  
6 3 India

7 4  
8  
9 5 Pratik Shah<sup>1\*</sup>¶ Ph.D., Gregory Yauney<sup>1\*</sup>, Otkrist Gupta<sup>1</sup>, Vincent Patalano II<sup>2,3</sup> M.D., Mrinal Mohit<sup>1</sup>, Rikin  
10  
11 6 Merchant<sup>4</sup> BDS, S. V. Subramanian<sup>5</sup> Ph.D.

12 7  
13  
14  
15 8 <sup>1</sup> Massachusetts Institute of Technology, Cambridge, Massachusetts, United States of America

16  
17 9 <sup>2</sup> Cambridge Health Alliance, Department of Ophthalmology, Cambridge, Massachusetts, United States of  
18 10 America

19  
20 11 <sup>3</sup> Harvard Medical School, Department of Ophthalmology, Boston, Massachusetts, United States of America

21 12 <sup>4</sup> Karmaveer Bhausahab Hiray Dental College and Hospital, Department of Prosthodontics, Nashik, India

22  
23 13 <sup>5</sup> Harvard T.H. Chan School of Public Health, Department of Social and Behavioral Sciences, Boston,  
24 14 Massachusetts, United States of America

25 15  
26  
27 16  
28  
29 17 ¶ Corresponding author

30  
31 18 E-mail: pratiks@mit.edu

32 19 \*These authors contributed equally to this work.  
33  
34 20  
35  
36 21  
37  
38  
39  
40  
41  
42  
43  
44  
45  
46  
47  
48  
49  
50  
51  
52  
53  
54  
55  
56  
57  
58  
59  
60

1  
2 22 ABSTRACT

3  
4 23 **Objectives:** Technology-enabled non-invasive diagnostic screening (TES) using smartphones and other point-of-  
5  
6 24 care medical devices was evaluated in conjunction with conventional routine health screenings for the primary  
7  
8 25 care screening of patients.

9  
10 26 **Design:** Dental conditions, cardiac ECG arrhythmias, tympanic membrane disorders, blood oxygenation levels,  
11  
12 27 optic nerve disorders, and neurological fitness were evaluated using FDA-approved advanced smartphone  
13  
14 28 powered technologies. Routine health screenings were also conducted. A novel remote web platform was  
15  
16 29 developed to allow expert physicians to examine TES data and compare efficacy with routine health screenings.

17 30 **Setting:** The study was conducted at a primary care center during the 2015 Kumbh Mela in Maharashtra, India.

18  
19 31 **Participants:** 455 consenting 18 to 90 years adults attending the 2015 Kumbh Mela were tested.

20  
21 32 **Results:** TES and routine health screenings identified unique clinical conditions in distinct patients. Intraoral  
22  
23 33 fluorescent imaging classified 63.3% of the population with dental caries and periodontal diseases. An association  
24  
25 34 between poor oral health and cardiovascular illnesses was also identified. Tympanic membrane imaging detected  
26  
27 35 eardrum abnormalities in 13.0% of the population, several with a medical history of hearing difficulties. Gait and  
28  
29 36 coordination issues were discovered in eight subjects and one subject had arrhythmia. Cross-correlations were  
30  
31 37 observed between low oxygen saturation and low BMI with smokers ( $p = 0.0087$  and  $p = 0.0122$ , respectively),  
32  
33 38 and association of high BMI with elevated blood pressure in middle-aged subjects were found.

34 39 **Conclusions:** TES synergistically identified clinically significant abnormalities in several subjects who otherwise  
35  
36 40 presented as normal in routine health screenings. Physicians validated TES findings and utilized routine health  
37  
38 41 screening data and medical history responses for comprehensive diagnoses for at-risk patients. TES identified  
39  
40 42 high prevalence of oral diseases, hypertension, obesity and ophthalmic conditions among the middle-aged and  
41  
42 43 elderly Indian population, calling for public health interventions.

43  
44 44  
45  
46 45 **Ethics approval:** The Mahatma Gandhi Vidyamandir Karmaveer Bhausaheb Hiray Dental College & Hospital  
47  
48 46 institutional ethics committee reviewed and approved protocol MGVBHDC/15-16/571 for clinical data collection  
49  
50 47 in Nashik, India. Deidentified data was transferred and analyzed at Massachusetts Institute of Technology (MIT)  
51  
52 48 in Cambridge, MA, according to MIT Committee on the Use of Humans as Experimental Subjects approval for  
53  
54 49 protocol 1512338971.

1  
2 51 Strengths and limitations of this study:

- 3  
4 52 • The strength of this work is that it is one of the first studies to investigate using technology-enabled  
5  
6 53 mobile health screenings to augment routine health examinations.
- 7  
8 54 • The study describes development and successful use of web examination platforms that enabled multiple  
9  
10 55 physicians to diagnose health conditions remotely.
- 11  
12 56 • A limitation of this study is that sample sizes for each test were different with respect to number of  
13  
14 57 subjects and gender distribution.
- 15  
16 58 • This study is limited to cross-sectional analysis. A future longitudinal study may allow for additional  
17  
18 59 insights into time-varying conditions.  
19  
20 60

## INTRODUCTION

Providing good healthcare in low and middle-income countries (LMIC) paradoxically requires expensive equipment for health monitoring and assessment which may not be easily available because of resource-limitations[1]. Cardiovascular diseases, preventable blindness, oral cancer and treatable neurological conditions constitute more than half of the disease burden in LMIC and result in significantly morbidity and mortality[2, 3]. India, with a population in excess of 1.2 billion individuals, is one of the largest countries in the world[4]. India has significant disparity in access to basic healthcare and diagnostic screenings due to its geographically fragmented medical infrastructure[5]. Consequently, significant portions of the population may exist either as undiagnosed, diagnosed but unaware or misdiagnosed for several high-risk diseases at the primary care level.

Inexpensive device-based imaging and first-level analysis (e.g., smartphones capable of pulse oximetry, blood pressure, ECG recording and analysis or image segmentation) either operated by human experts, by operators with basic training using algorithms or clinical decision support systems are examples of affordable and potentially scalable technology-enabled screening[6, 7]. Previous reports from our group have demonstrated the utility of smartphones, modular devices and imaging technologies for sleep apnea[8] and refractometry screenings[9], at-home monitoring of diabetic retinopathy[10] and detecting melanomas[11]. Using smartphones with low-cost adapters, other researchers have also performed oral and cervical cancer[12], diabetic retinopathy [13], and malaria[14] assessments. Mobile smartphones equipped with imaging adapters, high-resolution cameras, light emitting diodes, fast processors and lightweight apps can thus be used for targeted diagnostic screenings at modest expense[15, 16].

The majority of previous studies using newer TES approaches have been performed in silos concentrating on individual devices or specific anatomical sites, often precluding more comprehensive assessment of patient health[17-23]. Interpretation of TES data has also been limited by risk of bias, differences between study groups and lack of comparison to established routine health screenings that are otherwise commonly deployed in primary care screenings. Due to these reasons, a lack of consensus exists about the usefulness of TES in augmenting primary health screenings in LMIC. Therefore, there is a pressing need for cost-effective, reliable screening protocols and deployable technologies to empower LMIC medical professionals and healthcare providers to identify patients and add them to the continuum of care.

The 2015 Kumbh Mela mass gathering[24] presented a unique opportunity for deployment and side-by-side evaluation of TES and routine health screenings. Multiple TES devices and methods and a remote clinical examination system to facilitate examination of findings were utilized to evaluate their collective use for

1  
2 91 comprehensive diagnoses of consenting adults. This study assesses whether low-cost, portable and non-invasive  
3  
4 92 examinations using TES can augment conventional routine health screenings by detecting additional anatomical,  
5  
6 93 structural or biomarker-driven disease pathologies.  
7  
8  
9  
10  
11  
12  
13  
14  
15  
16  
17  
18  
19  
20  
21  
22  
23  
24  
25  
26  
27  
28  
29  
30  
31  
32  
33  
34  
35  
36  
37  
38  
39  
40  
41  
42  
43  
44  
45  
46  
47  
48  
49  
50  
51  
52  
53  
54  
55  
56  
57  
58  
59  
60

For peer review only

## METHODS

**Study design:** 494 consenting adults between the ages of 18 and 90 years were screened by multiple tests in the order outlined in **Fig 1** at the Mahatma Gandhi Vidyamandir Karmaveer Bhausaheb Hiray Dental College & Hospital (MGVKBHDC) in Nashik, India, during the 2015 Sinhast Kumbh Mela (14 July-25 September). The MGVKBHDC institutional ethics committee reviewed and approved protocol MGVKBHDC/15-16/571 for clinical data collection in Nashik, India. Deidentified data was transferred and analyzed at Massachusetts Institute of Technology (MIT) in Cambridge, MA, according to MIT Committee on the Use of Humans as Experimental Subjects approval for protocol 1512338971. **Table 1** shows the number of subjects who completed each test. Subjects could exit the study at their convenience, and the study design allowed for different numbers of subjects for each test (**Table 1**). Inclusion criteria, ethical consideration, and consent procedure are described in the supplementary appendix.

**Medical questionnaire and routine health screenings:** A designated physician administered a medical questionnaire, where subjects provided verbal answers and the physician was responsible for entering their answers into a computerized interface. The detailed questionnaire included geographic and demographic questions as well as questions about past medical history and current illnesses but did not capture data from past healthcare records. Height, weight, systolic and diastolic blood pressure, resting heart rate, and temperature were also each measured, separately by a different physician.

**Technology-enabled screening:** FDA-approved devices were used to image patients, CellScope Oto (CellScope Inc. USA) for the tympanic membrane, D-EYE Direct Ophthalmoscopy Adapter (D-EYE Srl, USA) for the optic nerve head, and SOPROCARE (SOPRO Acteon Imaging, France) for dental health. Microsoft Kinect (Microsoft Corporation, USA) was used to record subjects performing gait and coordination tests (**Supplementary Fig 1**). AliveCor Mobile ECG (AliveCor Inc, USA) was used to capture and analyze a 30-second rhythm strip. A CMS 50-DL Pulse Oximeter (Contec Medical Systems, USA) was used to measure blood oxygen saturation levels of hemoglobin. All devices and clinical evaluations have been previously described elsewhere [17-20, 23, 25-29]. The supplementary appendix details specific procedures for each device and the principles by which each operates.

**Data analyses:** Expert physicians conducted diagnostic feature annotation of de-identified images and videos collected by TES via a web-based examination portal in order to maximize time in the field for screening additional subjects (**Supplementary Methods**). This password-protected secure interface displayed an image or video for one patient at a time for a given examination. Physicians were able to mark specific features in the



1  
2 124 videos by drawing boxes around them that paused that specific frame, assign an overall score of 1 (best) to 5  
3  
4 125 (worst) for the entire video, and to write clinical features that were present for specific frames or the entire video  
5  
6 126 (**Supplementary Fig 2**). A panel of at least three physicians for each type of examination was assembled who  
7  
8 127 remotely and independently annotated the data facilitated by the web interface. The majority ratings for each  
9  
10 128 subject were then calculated for all TES tests. For subjects with no majority rating, the lesser of the tied ratings  
11  
12 129 was chosen to not overstate the prevalence of diagnosed illnesses. On average, each physician spent tens of  
13  
14 130 seconds to approximately a minute annotating each per video. Results from each test were analyzed for cross-  
15  
16 131 correlations with medical questionnaire responses, age and sex. Analyses of results from specific tests include  
17  
18 132 data from all subjects who completed that test.  
19  
20  
21  
22  
23  
24  
25  
26  
27  
28  
29  
30  
31  
32  
33  
34  
35  
36  
37  
38  
39  
40  
41  
42  
43  
44  
45  
46  
47  
48  
49  
50  
51  
52  
53  
54  
55  
56  
57  
58  
59  
60

## RESULTS

**Medical history and routine health screenings:** Results of routine health screenings are shown in **Table 1**, with gender and age range breakdowns in **Supplementary Table 1**. Medical questionnaire responses are shown in **Supplementary Tables 2, 3, and 4**. Accepted clinical ranges for each condition identified by routine health screenings through consultation with physicians and were applied automatically to the routine health screening data without requiring physicians to annotate the data on a per-patient basis (**Supplementary Methods**) [25, 30, 31]. Obesity (39.7%) and elevated blood pressure (19.3%) were identified as most prevalent among the screened population. In comparing our data to the latest release of the National Family and Health Survey, we detected higher prevalence of high BMI and elevated blood pressure for both females and males but a similar prevalence of low BMI (**Supplementary Tables 5, 6**) [32].

**Population demographic analysis:** It took an average of approximately 35 minutes for each patient to complete the medical questionnaire, routine health screenings and TES screening. Overall, there were more male than female participants which is likely at least in part the consequence of the fact that there are generally more male pilgrims at outdoor Indian religious festivals, including the Kumbh Mela. The gender breakdown for nearly all tests was approximately 60% males and 40% females, though gait analysis had an equal percent of both because the subjects who stayed long enough to complete that screening happened by chance to be split equally among males and females (**Supplementary Fig 3**). Adolescents (18 and 19 years of age) and old adults (65-90 years of age) were approximately 30% of the total population (**Supplementary Fig 4**). The remaining 70% of the population comprised approximately 31% of young adults (20-39 years) and approximately 39% middle age (40-64 years) subjects (**Supplementary Fig 4**). Three-fold more female than male adolescents and four-fold more old-aged males than old-aged females participated in the study, whereas other age groups had roughly equal numbers of males and females (**Supplementary Table 1**)

**Medical questionnaire responses:** Medical histories of dental issues, swollen joints, hearing difficulties, and leg cramps were each reported by 26.1%, 25.3%, 21.9%, 18.6% of the population, respectively (**Supplementary Table 2**). Several respondents reported a history of diabetes, blood pressure and cardiovascular diseases in their families. 8.9% of total respondents reported that they had been diagnosed with high blood pressure, and 6.3% were being treated for the disease (**Supplementary Table 2**). Subjects diagnosed with a certain clinical condition and/or undergoing treatment for it may not be the same individuals. 50.0% out of 494 respondents reported they wear glasses, indicating that they have refractive error vision problems. (**Supplementary Table 2**). Roughly equal numbers of both sexes responded yes to the majority of questions, with the exception of tobacco addiction,

1  
2 163 which was reported almost exclusively by males (**Supplementary Table 2**). **Supplementary Table 3** shows the  
3  
4 164 age-cohort distribution of percentage of the people who said yes to a particular question (e.g. approximately 17%  
5  
6 165 of the 98 subjects who said they had family history of diabetes were 18-19 year olds). Barring family history of  
7  
8 166 diabetes, high blood pressure, and thyroid and cardiovascular diseases; higher percentages of middle- and older-  
9  
10 167 aged adults said yes to the majority of all other questions (**Supplementary Table 3**). Additionally, higher  
11  
12 168 percentages of individuals in the middle and old age groups vs. adolescents and young adults answered yes to  
13  
14 169 medical history questions (e.g. approximately 35% of the 65 subjects in the 18-19 age group said they had a  
15  
16 170 vision problem vs. approximately 67% and approximately 75% of 40-64 and 65-90-year-olds) (**Supplementary**  
17  
18 171 **Table 4**). **Supplementary Tables 2, 3, and 4** each show the full list of questions asked in the medical  
19  
20 172 questionnaire.

21 173 **Prevalence of obesity and hypertension in males and low BMI in young females:** Routine health screenings  
22  
23 174 showed that approximately 19.3% of 455 subjects in the study had elevated blood pressure, and 0.9% had lower  
24  
25 175 than normal blood pressure (**Table 1**). 22.5% of the 276 tested males of all age groups had elevated blood  
26  
27 176 pressure measurements compared to 14.5% of the 179 tested females (**Table 2**). High BMI was measured in  
28  
29 177 39.7% of the tested population (**Table 1**). Middle age adults (40-64 years) had statistically significantly higher BMI  
30  
31 178 than young adults (20-39 years) and old age subjects (65-90 years) (**Supplementary Table 7**). Middle and old  
32  
33 179 age subjects also had statistically significantly higher BP than adolescents and adult participants in the study  
34  
35 180 (**Supplementary Table 7**). Approximately 18.0% of the tested population was underweight (**Table 2**). More  
36  
37 181 females in the 18-19 and 20-39 age groups and more males in the 40-64 and 65-90 age groups had lower BMI  
38  
39 182 than subjects in other age groups (**Supplementary Table 5**). Overall, more males aged 20-39 were found to be  
40  
41 183 obese compared to females of that age group ( $p=0.0375$ ) who in fact were scored as underweight by statistical  
42  
43 184 significance. Forty-two subjects, the majority in the 40-64 age group, suffered from hypertension and had high  
44  
45 185 BMI. Underweight males and females between the ages of 40-64 also found to be at higher risk for elevated blood  
46  
47 186 pressure ( $n=9$ ).

48 187 **Comparisons between medical questionnaire and results from routine health screenings:** Adults aged 40  
49  
50 188 years and older of both sexes who were classified as abnormal in any routine health screening were the largest  
51  
52 189 group of subjects correspondingly reporting family history, being diagnosed with, or receiving treatment for  
53  
54 190 several diseases on the questionnaire. **Supplementary Table 8** lists  $p$ -values and percentages for cross-  
55  
56 191 correlations between medical histories and results from routine health screenings. Statistically significant  
57  
58 192 correlations between obesity and subjects who wore glasses (58.7%), reported high blood pressure (13.3%) or  
59

1  
2 193 had a family history of diabetes (24.5%) or hypertension (20.9%) were identified ( $p = 0.0024$ ,  $p = 0.0091$ ,  $p =$   
3  
4 194  $0.0384$ ,  $p = 0.0173$ , respectively) (**Supplementary Table 8**). Interestingly, overweight subjects were more  
5  
6 195 statistically significantly likely to be non-smokers; conversely, underweight subjects were more likely to be either  
7  
8 196 addicted to tobacco and/or smokers ( $p = 0.0406$ ,  $p = 0.0122$ , respectively). Occurrences of high blood pressure  
9  
10 197 cross-correlated with several groups of individuals' with a medical history of swollen joints, difficulty walking and  
11  
12 198 diabetes ( $p = 0.0425$ ,  $p = 0.0483$ ,  $p = 0.0004$ , respectively). Subjects reporting either history of hypertension ( $n=7$ )  
13  
14 199 or undergoing hypertension treatment ( $n=14$ ) were statistically significantly more likely ( $p = 0.0006$ ,  $p = 0.0002$ ) to  
15  
16 200 be measured with high blood pressure during our screening (**Supplementary Table 8**). High BMI and high blood  
17  
18 201 pressure were additionally found to be correlated with many conditions on the medical questionnaire  
19  
20 202 (**Supplementary Table 9**).

21 203 **Identification of clinical conditions using TES:** Fig 2 shows representative diagnostic images and associated  
22  
23 204 diagnoses captured using TES. Intraoral fluorescent (63.3%), tympanic membrane (13.0%) and oxygen saturation  
24  
25 205 (4.2%) imaging examinations identified the largest percentage of unhealthy subjects (**Table 1**). **Supplementary**  
26  
27 206 **Table 10** shows the breakdown of abnormal results by gender and age range. Approximately 38.0% of subjects  
28  
29 207 had dental caries and 28.0% had one or more teeth missing. Periodontal diseases were found in 14.8% of the  
30  
31 208 population (**Supplementary Table 11**). Previously undiagnosed subjects with abnormalities in their ECG rhythm  
32  
33 209 strip ( $n=1$ ), optic nerve imaging ( $n=9$ ), gait analysis ( $n=5$ ) and finger-nose coordination ( $n=3$ ) test results were  
34  
35 210 identified (**Table 1**). The expert physicians annotated all nine subjects identified with abnormal optic nerve heads  
36  
37 211 with a cup-to-disc ratio more than 0.3. All subjects who completed the hand tremor and finger-count tests were  
38  
39 212 found to be normal.

40 213 A slightly larger percentage of tested female participants compared to males were determined to be  
41  
42 214 unhealthy across the majority of TES tests, although the differences were not statistically significant with the  
43  
44 215 exception of middle-aged females who were statistically more likely to have poor dental health than middle-aged  
45  
46 216 males ( $p=0.0266$ ). Middle-aged ( $n=120$ ) and older ( $n=66$ ) adults of both sexes encompassed 70.7% of all subjects  
47  
48 217 with abnormal oral TES results (**Supplementary table 10**). Statistically higher prevalence of dental diseases was  
49  
50 218 measured in 65-90-year-olds and 40-64-year-olds compared to 18-19-year-olds and 20-39-year-olds ( $p<0.0001$  in  
51  
52 219 all four cases). Low blood oxygen saturation and abnormal tympanic membranes were found in 13 and 26  
53  
54 220 subjects, respectively, who also had dental issues (**Supplementary table 12**). One subject each had low blood  
55  
56 221 oxygen, tympanic membrane problems and unsatisfactory performance in the gait test. Adults aged 40 and above  
57  
58 222 of both sexes were the majority of the subjects who failed two TES tests.

1  
2 223 **Identification of subjects with abnormal routine health screenings and TES results:** Numbers of subjects  
3  
4 224 who were scored not normal in one test each from TES and routine health screening are shown in  
5  
6 225 **Supplementary Table 13.** High and low BMI followed by elevated blood pressure measurements were most  
7  
8 226 prevalent in subjects with abnormal TES results. Underweight individuals made up 18.0% of the population (**Table**  
9  
10 227 **1**), and 42.1% of these individuals also had low blood oxygen saturation ( $p=0.0110$ ) (**Supplementary Table 13**).  
11 228 Similarly, approximately one third of the individuals with tympanic membrane abnormalities also had low BMI.  
12  
13 229 Abnormal optic disc diameters were measured in four overweight participants (**Supplementary Table 13**). Dental  
14  
15 230 screening identified the largest numbers of unhealthy subjects from the population who were measured with either  
16  
17 231 high BMI, low BMI or elevated blood pressure, but these cross-correlations were not statistically significant due to  
18  
19 232 extensive prevalence poor oral health in the community. Overall, high BMI (39.7%) and elevated blood pressure  
20  
21 233 (19.3%) and poor dental health (63.3%) were widespread in middle-aged and older adults of the population  
22  
23 234 (**Table 1, Supplementary tables 5 and 10**).

24  
25 235 **Comparisons between medical questionnaire and results from TES:** **Table 2** shows percentages of subjects  
26  
27 236 who were scored as not normal in a particular TES test and responded yes to a medical history question.  
28  
29 237 Individuals with swollen joints, hearing, and walking issues were found to be more likely to be scored as abnormal  
30  
31 238 in TES tests compared to other groups. Four subjects (21.1%) measured with low oxygen saturation had a  
32  
33 239 medical history of being smokers and this correlation was statistically significant (**Supplementary table 14**).  
34 240 40.5% of the subjects for whom we identified tympanic membrane abnormalities reported hearing issues  
35  
36 241 ( $p=0.0053$ ). (**Supplementary table 14**). Presence of dental caries, gingivitis and or periodontal diseases was  
37  
38 242 correlated with more statistically significant incidences of various clinical conditions reported in the medical  
39  
40 243 questionnaire. High percentages of subjects scored as not normal in the finger-nose ( $n=3$ ) and or gait tests ( $n=5$ )  
41  
42 244 had reported hearing issues (**Table 2**). Similar to results in routine health screenings, individuals aged 40 years  
43  
44 245 and older of both sexes were the largest group of subjects who gave affirmative responses to the questionnaire  
45  
46 246 and abnormal TES results, although this was not statistically significant.

47  
48 247 **TES synergistically identifies unique subset of abnormal individuals in conjunction with routine health**  
49  
50 248 **screenings:** Data from subjects who completed the medical questionnaire, all routine health screenings and all  
51  
52 249 TES tests ( $n=111$ ) allowed comprehensive analyses. Subjects who exited the study before completing all routine  
53  
54 250 health screenings and TES tests were not considered in these analyses. Routine health screenings identified 32  
55  
56 251 as normal and 79 as abnormal from these 111 subjects, compared to 41 normal and 70 abnormal subjects  
57 252 classified by TES (**Supplementary Table 15**). **Supplementary Tables 16 and 17** show the data for each of the  
58  
59

1  
2 253 111 subjects. Our data indicates that a similar percentage of these 111 subjects benefitted from diagnosis offered  
3  
4 254 by TES as those screened by routine health screenings. **Table 3** shows the age and gender profiles for 111  
5  
6 255 subjects and the differential diagnoses between the two screening methods.

7  
8 256 Overall, we found abnormal BMI measurements and poor dentition led to the majority of the abnormalities  
9  
10 257 in these 111. Tympanic membrane and BP abnormalities were the second-most widespread in this cohort.  
11  
12 258 Medical questionnaire responses and TES screening results from these 111 subjects illustrate another use case  
13  
14 259 with value for augmented screening. Several individuals with healthy medical histories were found to have either  
15  
16 260 abnormal routine health screenings (n=12) or TES results (n=7) or both (n=6). Dental and ear issues were the  
17  
18 261 most common TES abnormalities associated with these subjects with healthy medical histories. Importantly, all  
19  
20 262 seven subjects with a healthy medical questionnaire identified as abnormal by TES (dental, n=5; optic nerve, n=1;  
21  
22 263 tympanic membrane, n=1) had no previous diagnoses of these conditions and were different from the 12  
23  
24 264 individuals with abnormal routine health screenings. These results indicate the unique and synergistic value of  
25  
26 265 TES in providing comprehensive care in conjunction with routine health screenings.

1  
2 266 DISCUSSION

3  
4 267 Many of the subjects identified by TES did not have any abnormal routine health screenings, indicating  
5  
6 268 that TES can play a role in identifying subjects who need care but would not be identified by routine health  
7  
8 269 screenings alone. Each TES test identified distinctive abnormalities in different patients and played a distinct role in  
9  
10 270 identifying at-risk or sick individuals. Because the TES tests screen for much different conditions than the routine  
11  
12 271 health screenings, our results indicate mutually independent but not entirely mutually exclusive performances of  
13  
14 272 both in identifying at-risk or sick subjects. We examined several potential moderators and old age was a  
15  
16 273 statistically significant premonition for abnormal TES results, underscoring the crucial role for augmented  
17  
18 274 screenings in middle-aged and geriatric individuals. Large proportions of subjects identified with abnormalities in  
19  
20 275 oral (69.1%), tympanic membrane (59.5%), and retinal (33.3%) tests, as well as the only subject in the single-lead  
21  
22 276 ECG test, did not report their respective conditions on their medical questionnaires. TES thus facilitates more  
23  
24 277 thorough and non-invasive primary care screenings and may expedite early interventions for conditions not  
25  
26 278 identified by routine health screenings.

27  
28 279 Routine health screenings provided valuable insights into the rising epidemics of hypertension and  
29  
30 280 obesity in the screened population in our study. Approximately 19.3% of the screened population in our study was  
31  
32 281 suffering from hypertension. 18.0% of the screened population in our study was underweight (BMI <18.5) and  
33  
34 282 several of these subjects were hypoxic, with low oxygen saturation, which can be considered a proxy measure for  
35  
36 283 anemia. Pulseoximetry screenings identified 19 subjects with <90% SpO<sub>2</sub>. Vold et.al, in studies carried out in  
37  
38 284 Norway, have reported high BMI, middle age and smoking as predictors of oxygen saturation[33]. Subjects with  
39  
40 285 low blood oxygen had medical histories of smoking addiction and asthma. Most of them were middle-aged males,  
41  
42 286 and the majorities were underweight. We also detected optic nerve abnormalities, dental diseases, gait and  
43  
44 287 hearing difficulties in subjects with low blood oxygen, suggesting that a poor overall health status may co-exist  
45  
46 288 with low blood oxygen measurements. Our data suggests the usefulness of deploying pulse oximetry for general  
47  
48 289 health screenings, especially for underweight patients in LMIC.

49  
50 290 Inadequate dental hygiene and resulting sequelae can have significant impact on quality of life and  
51  
52 291 increase the risk of cardiovascular diseases[34, 35]. "Remote monitoring" and "Store-forward" approaches for  
53  
54 292 dental examinations, reviewed elsewhere[36], have been used for teledentistry. In patients aged 65-74 years, the  
55  
56 293 prevalence of caries was approximately 70% and multi-centric oral health survey reported the prevalence of  
57  
58 294 carries to be 51-95% [37]. We found approximately 48% of 65-90-year-olds diagnosed with caries or periodontal



1  
2 295 disease. A high percentage of 45-60-year-old subjects in our study, who usually may not have been detected by  
3  
4 296 traditional methods, were identified with poor dental health and may have been detected due to the more  
5  
6 297 comprehensive evaluation offered by TES. Significant cross-correlations between patients reporting  
7  
8 298 cardiovascular treatment with poor oral health ( $p=0.0267$ ) was identified, underscoring the importance of routine  
9  
10 299 dental care and calling for urgent attention to the oral disease epidemic in India.

11  
12300         There are approximately 11.2 million persons aged 40 years and older with glaucoma in India[38]. The  
13  
14301 most common optic nerve abnormalities that were detected in our study were optic nerve cupping as a risk factor  
15  
16302 for glaucoma, and optic nerve head neovascularization that is a sign of diabetic retinopathy. All nine patients who  
17  
18303 were scored as abnormal by optic nerve photography in our study had a DDLS scores of three, indicating early  
19  
20304 onset of glaucoma. The majority of these patients were females aged between 20-64 years whereas two old age  
21  
22305 males were marked abnormal. Four patients were also obese and high blood pressure was measured in two  
23  
24306 individuals, highlighting vulnerable status of young and middle aged obese Indian population.

25  
26307         Smartphone-enabled tele-otology has been deemed suitable for both on-site and remote diagnoses of  
27  
28308 tympanic membrane and Otitis media (OM) previously[39]. Perforated tympanic membranes (59.2%) and/or  
29  
30309 effusions (47.6%) were most prevalent in patients labeled as abnormal by ENT surgeons. These patients may  
31  
32310 have been suffering from OM infection and or a generalized inflammation. A large segment of these subjects were  
33  
34311 middle age or older adults and were also the predominant group that failed the gait and coordination test.  
35  
36312 Physician consensus, imaging data and a history of hearing issues emphasize the substantial challenges in  
37  
38313 diagnosing and treating these patients. We did not perform audiology or speeches tests with these subjects and  
39  
40314 thus are unable to cross correlate the imaging data with functional tests.

41  
42315         Due to acute shortages of trained neurologists, diagnoses of neurological disorders is extremely  
43  
44316 challenging in LMIC[40]. Three subjects in the finger-nose test were identified with incoordination and dysmetria.  
45  
46317 Seven out of the eight total subjects failing neurological tests were males older than 40 years, and three were  
47  
48318 underweight. The majority of subjects failing either the gait and/or finger-nose tests a medical history of swollen  
49  
50319 joints and a few said that they had difficulty in walking (all subjects were able to walk unassisted). It is conceivable  
51  
52320 that these issues may be unlinked or causal to their performance in the gait test. However, none of these  
53  
54321 conditions had previously been diagnosed in these individuals reaffirming a need for more aggressive and large-  
55  
56322 scale screening using TES methods. We are working on generative algorithms for classification of various  
57  
58323 neurological disorders and hope to incorporate these in future studies.



1  
2 324 Physicians using TES devices in our study commented that a brief period of acclimatization was  
3  
4 325 necessary in both use and interpretation of results from the devices before use in the study. Incorporating training  
5  
6 326 for use of mobile technologies for diagnoses during medical school can reduce this learning curve. To our  
7  
8 327 surprise, most of our tele-examination physicians could accurately diagnose presented conditions often with  
9  
10 328 overwhelming consensus between them. Patients enrolled in our study were also pleased to see immediate  
11  
12 329 results from TES and get rapid feedback from physicians. We acknowledge that TES devices may provide only an  
13  
14 330 indication of the clinical pathologies they evaluate instead of a thorough diagnosis. Despite the claims made by  
15  
16 331 device manufacturers, we also recognize that in their current form-factor TES will not replace or completely  
17  
18 332 remove the physician from the loop. We used representative, clinically validated devices in this study, and our  
19  
20 333 diagnoses may be generalizable to findings from similar datasets. Due to some subjects leaving the study early,  
21  
22 334 the numbers of patients examined by each TES test and routine health screening were not identical, restricting  
23  
24 335 more comprehensive analyses to the 111 subjects who completed all tests. Although this work is one of the  
25  
26 336 largest, if not the largest, studies carried out using a wide array of different TES methods, a larger sample size in  
27  
28 337 follow-up studies may result in more comprehensive identification of patient demographics and the full gamut of  
29  
30 338 clinical conditions. We do, however, emphasize that one goal of this study was to conduct a cross-sectional  
31  
32 339 analysis of both the population and the tests instead of focusing on only one TES method with a large sample  
33  
34 340 size.

34 341 While routine health screenings continue to be important, this study demonstrates that the emerging  
35  
36 342 techniques of TES can play an important synergistic role in stratifying populations and providing personalized  
37  
38 343 screening and care, especially in LMIC. Multiple TES screening methods and data analyses outlined in this study  
39  
40 344 can help in training and standardization for deployment of augmented, low-cost, non-invasive and portable  
41  
42 345 screening approaches in conjunction with traditional primary healthcare exams, leading to increased clinical  
43  
44 346 interventions, diagnoses and awareness of health conditions for individuals.

## Footnotes

**Acknowledgments:** We thank physicians, staff, student volunteers and Dr. Sanjay Bhawsar of MGVBHDC for support for conducting this study, Dr. Arun Jamkar and Maharashtra Health and Sciences University, India for guidance to select the location and Krishna Rastogi, Sathya Sai, Hisham Bedri, Geetanjali Rathore, Mayank Kumar and Akshat Wahi for technical assistance. Dr. Judy-Fine Edelstein, Dr. Diana Green and Tek Yadav of Cambridge Health Alliance, Cambridge, MA; Dr. Maneesh Bapaye, Sunil Ugale, Dr Shirish Ghan and Dr. Roma Bagi Nashik, India and Dr. Tulio Valdez, Massachusetts Institute of Technology for help in expert clinical evaluations.

**Licensing:** *The Corresponding Author has the right to grant on behalf of all authors and does grant on behalf of all authors, a worldwide licence to the Publishers and its licensees in perpetuity, in all forms, formats and media (whether known now or created in the future), to i) publish, reproduce, distribute, display and store the Contribution, ii) translate the Contribution into other languages, create adaptations, reprints, include within collections and create summaries, extracts and/or, abstracts of the Contribution, iii) create any other derivative work(s) based on the Contribution, iv) to exploit all subsidiary rights in the Contribution, v) the inclusion of electronic links from the Contribution to third party material where-ever it may be located; and, vi) licence any third party to do any or all of the above."*

**Data sharing:** *Anonymized patient level data and or full dataset will be made available following standard MIT Committee on the Use of Humans as Experimental Subjects data sharing protocols.*

**Funding:** *Massachusetts Institute of Technology Media Lab and Karmaveer Bhausahab Hiray Dental College and Hospital departmental funds.*

**Competing interests:** *"All authors have completed the ICMJE uniform disclosure form at [www.icmje.org/coi\\_disclosure.pdf](http://www.icmje.org/coi_disclosure.pdf) and declare: no support from any organisation for the submitted work; no financial relationships with any organisations that might have an interest in the submitted work in the previous three years; no other relationships or activities that could appear to have influenced the submitted work."*

**Author contributions:** *Otkrist Gupta, Mrinal Mohit, and Gregory Yauney organized the data received from collaborating institution by pooling various test data for each patient, Otkrist Gupta created a web analysis platform for remote examinations; Pratik Shah, Otkrist Gupta, SV Subramanian, Vincent Patalano and Gregory Yauney analyzed and interpreted data labeled by expert physicians; Pratik Shah, Gregory Yauney, and Otkrist Gupta performed literature search; Gregory Yauney made figures; Pratik Shah and Gregory Yauney wrote the manuscript; Rikin Merchant led clinical data collection and coordinated transfer to MIT; Pratik Shah supervised the research and directed the study at MIT.*

1  
2 384 FIGURE LEGENDS

3 385  
4 386  
5 387 **Fig 1.** Study design. Flowchart for overall screening procedure.

6 388  
7 389  
8 390  
9 391  
10 392  
11 393  
12 394  
13 395 **Fig 2.** Representative images of labeled conditions detected in technology-enabled screenings.  
14 396 (A) Normal images for technology-enabled screenings. Left-to-right, top-to-bottom: dental, periodontal, tympanic  
15 397 membrane, optic nerve.

16 398 (B) Labeled conditions for technology-enabled screenings. Left-to-right, top-to-bottom: caries, missing teeth,  
17 399 periodontal disease, perforated eardrum, effusion, width of optic rim 0.01-0.1.

18 400  
19 401

20 402  
21 403

22 404  
23 405

24 406  
25 407

26 408  
27 409

28 410  
29 411

30 412  
31 413

32 414  
33 415

34 416  
35 417

36 418  
37 419

38 420  
39 421

40 422  
41 423

42 424  
43 425

44 426  
45 427

46 428  
47 429

48 430  
49 431

50 432  
51 433

52 434  
53 435

54 436  
55 437

56 438  
57 439

58 440  
59 441

60 442

**Table 1. Results of routine health screenings and technology-enabled screenings.**

|                                      | Female     |        | Male       |        | Total      |        |
|--------------------------------------|------------|--------|------------|--------|------------|--------|
|                                      | Abnormal   | Tested | Abnormal   | Tested | Abnormal   | Tested |
| <b>Routine health screenings</b>     |            |        |            |        |            |        |
| High BMI                             | 75 (38.9)  | 193    | 121 (40.2) | 301    | 196 (39.7) | 494    |
| Low BMI                              | 42 (21.8)  | 193    | 47 (15.6)  | 301    | 89 (18.0)  | 494    |
| High BP                              | 26 (14.5)  | 179    | 62 (22.5)  | 276    | 88 (19.3)  | 455    |
| Low BP                               | 3 (1.7)    | 179    | 1 (0.4)    | 276    | 4 (0.9)    | 455    |
| <b>Technology-enabled screenings</b> |            |        |            |        |            |        |
| Low blood oxygen                     | 5 (2.8)    | 179    | 14 (5.1)   | 276    | 19 (4.2)   | 455    |
| Single-lead ECG                      | 0 (0.0)    | 168    | 1 (0.4)    | 262    | 1 (0.2)    | 430    |
| Oral                                 | 109 (68.1) | 160    | 151 (60.2) | 251    | 260 (63.3) | 411    |
| Retinal                              | 5 (3.0)    | 169    | 4 (1.7)    | 235    | 9 (2.2)    | 404    |
| Tympanic membrane                    | 17 (13.5)  | 126    | 25 (12.6)  | 198    | 42 (13.0)  | 324    |
| Hand tremor                          | 0 (0.0)    | 127    | 0 (0.0)    | 186    | 0 (0.0)    | 313    |
| Finger-nose                          | 0 (0.0)    | 123    | 3 (1.6)    | 182    | 3 (1.0)    | 305    |
| Finger-count                         | 0 (0.0)    | 122    | 0 (0.0)    | 177    | 0 (0.0)    | 299    |
| Gait                                 | 1 (1.0)    | 104    | 4 (3.6)    | 110    | 5 (2.3)    | 214    |

Numbers and percentages (in parentheses) of males and females with conditions identified by routine health screenings and technology-enabled screenings.

**Table 2. Number of subjects identified with a clinical condition by a technology-enabled screening test and responded yes to a medical history question.**

| Abnormality | No. with abnormality | Glasses   | Dental | Swollen joints | Hearing | FH diabetes | FH high BP | Tobacco | Difficulty walking | High BP | Diabetes | High BP Rx | Asthma | Smoking | FH cardiac | Cardiac Rx | Cardiovascular | Low BP | FH stroke | FH eye disease | Heart attack | Coronary bypass | Drinking | Eye treatment | Memory loss | Ear treatment | FH ear disease |   |
|-------------|----------------------|-----------|--------|----------------|---------|-------------|------------|---------|--------------------|---------|----------|------------|--------|---------|------------|------------|----------------|--------|-----------|----------------|--------------|-----------------|----------|---------------|-------------|---------------|----------------|---|
|             |                      | Hypoxemia | 19     | 7              | 9       | 3           | 5          | 2       | 0                  | 3       | 3        | 0          | 0      | 0       | 3          | 4*         | 0              | 1      | 0         | 0              | 0            | 0               | 0        | 0             | 0           | 0             | 0              | 0 |
| TM          | 42                   | 22        | 14     | 14             | 17      | 7           | 6          | 3       | 5                  | 5       | 4        | 4          | 3      | 1       | 2          | 1          | 1              | 0      | 1         | 0              | 0            | 0               | 0        | 0             | 0           | 0             | 1              | 0 |
| Retinal     | 9                    | 6         | 5      | 4              | 4       | 2           | 2          | 0       | 3*                 | 1       | 0        | 1          | 0      | 0       | 0          | 1          | 1              | 0      | 0         | 0              | 0            | 0               | 0        | 0             | 0           | 0             | 0              | 0 |
| Oral        | 260                  | 145*      | 82*    | 85*            | 72*     | 41          | 31**       | 27      | 36*                | 30      | 23       | 24*        | 15     | 13      | 7          | 8*         | 4              | 3      | 2         | 3              | 3            | 3               | 1        | 2             | 2           | 1             | 1              |   |
| Finger-nose | 3                    | 1         | 1      | 3*             | 2       | 0           | 0          | 1       | 3*                 | 0       | 0        | 0          | 1      | 0       | 0          | 0          | 0              | 0      | 0         | 0              | 0            | 0               | 0        | 0             | 0           | 0             | 0              | 0 |
| Gait        | 5                    | 1         | 4*     | 4*             | 3       | 1           | 0          | 0       | 1                  | 0       | 0        | 0          | 0      | 1       | 0          | 0          | 0              | 0      | 0         | 0              | 0            | 0               | 0        | 0             | 0           | 0             | 0              | 0 |

Total populations reflect the number of subjects with the particular condition in that row. Multiple subjects were associated with more than one condition or questionnaire response.

TM: tympanic membrane.

\*  $p < 0.05$ , subjects are more likely to have responded yes to the column's question and have the condition.

\*\*  $p < 0.05$ , subjects are less likely to have responded yes to the column's question and have the condition.

**Table 3. Synergistic role of technology-enabled screening in identifying at-risk or sick individuals.**

| Routine health screenings |   | Adolescent (18-19) |      | Young adult (20-39) |      | Middle age (40-64) |      | Old age (65-90) |      | Total (n=111) |
|---------------------------|---|--------------------|------|---------------------|------|--------------------|------|-----------------|------|---------------|
| TES                       |   | Female             | Male | Female              | Male | Female             | Male | Female          | Male |               |
| ✓                         | ✓ | 5                  | 0    | 3                   | 0    | 0                  | 2    | 0               | 0    | 10            |
| x                         | ✓ | 5                  | 0    | 5                   | 12   | 2                  | 6    | 0               | 1    | 31            |
| ✓                         | x | 4                  | 0    | 5                   | 4    | 5                  | 3    | 0               | 1    | 22            |
| x                         | x | 5                  | 0    | 3                   | 7    | 9                  | 15   | 2               | 7    | 48            |
| Total in age cohort       |   | 19                 | 0    | 16                  | 23   | 16                 | 26   | 2               | 9    | 111           |

Check marks indicate normal status while x indicates abnormalities in a particular screening method.

1  
2 450 REFERENCES  
3

- 4 451 1. Rivo, M. 2008 World Health Report emphasizes importance of primary health care. *Am Fam Physician*.  
5 452 2009;79(12):1051.
- 6 453 2. Alwan, A, Maclean, DR, Riley, LM, et al. Monitoring and surveillance of chronic non-communicable  
7 454 diseases: progress and capacity in high-burden countries. *Lancet*. 2010;376(9755):1861-8.
- 8 455 3. Samb, B, Desai, N, Nishtar, S, et al. Prevention and management of chronic disease: a litmus test for  
10456 health-systems strengthening in low-income and middle-income countries. *Lancet*. 2010;376(9754):1785-97.
- 11457 4. Thakur, J. Key recommendations of high-level expert group report on universal health coverage for  
12458 India. *Indian J Community Med*. 2011;36(Suppl 1):S84-5.
- 13459 5. Shi, L. The impact of primary care: a focused review. *Scientifica (Cairo)*. 2012;2012:432892.
- 14460 6. Dhawan, AP, Heetderks, WJ, Pavel, M, et al. Current and Future Challenges in Point-of-Care  
15461 Technologies: A Paradigm-Shift in Affordable Global Healthcare With Personalized and Preventive Medicine. *IEEE*  
16462 *J Transl Eng Health Med*. 2015;3:2800110.
- 18463 7. Topol, EJ. Transforming medicine via digital innovation. *Sci Transl Med*. 2010;2(16):16cm4.
- 19464 8. Puri, RS, Athanassiadis, AG, Gill, N, et al. Design and preliminary evaluation of a wearable device for  
20465 mass-screening of sleep apnea. *Annual International Conference of the IEEE Engineering in Medicine and Biology*  
21466 *Society 2016;38th*
- 22467 9. Pamplona, VF, Mohan, A, Oliveira, MM, Raskar, R. NETRA: Interactive Display for Estimating Refractive  
23468 Errors and Focal Range. *Acm T Graphic*. 2010;29(4).
- 24469 10. Swedish, T, Roesch, K, Lee, IH, et al. eyeSelfie: Self Directed Eye Alignment using Reciprocal Eye Box  
25470 Imaging. *Acm T Graphic*. 2015;34(4).
- 27471 11. Das, A, Swedish, T, Wahi, A, et al. Mobile phone based mini-spectrometer for rapid screening of skin  
28472 cancer. *Proc Spie*. 2015;9482.
- 29473 12. Giller, G. Using a Smartphone to Detect Cancer. *Sci Am*. 2014;310(5):28-.
- 30474 13. Creuzot-Garcher, C, Martin-Phipps, T, Beynat, J, et al. Effectiveness of a Mobile Diabetic Retinopathy  
31475 Screening Campaign to Encourage Diabetics to Undergo Regular Ophthalmic Follow-Up. *Ophthalmic Res*.  
32476 2014;52(4):206-11.
- 33477 14. Pirnstill, CW, Cote, GL. Malaria Diagnosis Using a Mobile Phone Polarized Microscope. *Sci Rep-Uk*.  
34478 2015;5.
- 35479 15. Granot, Y, Ivorra, A, Rubinsky, B. A new concept for medical imaging centered on cellular phone  
36480 technology. *PLoS One*. 2008;3(4):e2075.
- 38481 16. Jani, IV, Quevedo, JI, Tobaiwa, O, et al. Use of mobile phone technology to improve the quality of point-  
39482 of-care testing in a low-resource setting. *AIDS*. 2016;30(1):159-61.
- 40483 17. Muhlestein, JB, Le, V, Albert, D, et al. Smartphone ECG for evaluation of STEMI: results of the ST LEUIS  
41484 Pilot Study. *J Electrocardiol*. 2015;48(2):249-59.
- 42485 18. Rechmann, P, Liou, SW, Rechmann, BM, Featherstone, JD. Performance of a light fluorescence device for  
43486 the detection of microbial plaque and gingival inflammation. *Clin Oral Investig*. 2016;20(1):151-9.
- 44487 19. Gabel, M, Gilad-Bachrach, R, Renshaw, E, Schuster, A. Full Body Gait Analysis with Kinect. *Ieee Eng Med*  
45488 *Bio*. 2012:1960-7.
- 47489 20. Richards, JR, Gaylor, KA, Pilgrim, AJ. Comparison of traditional otoscope to iPhone otoscope in the  
48490 pediatric ED. *Am J Emerg Med*. 2015;33(8):1089-92.
- 49491 21. Eikelboom, RH, Mbaio, MN, Coates, HL, Atlas, MD, Gallop, MA. Validation of tele-otology to diagnose ear  
50492 disease in children. *Int J Pediatr Otorhi*. 2005;69(6):739-44.
- 51493 22. Kopycka-Kedzierawski, DT, Bell, CH, Billings, RJ. Prevalence of dental caries in Early Head Start children  
52494 as diagnosed using teledentistry. *Pediatr Dent*. 2008;30(4):329-33.
- 53495 23. Russo, A, Morescalchi, F, Costagliola, C, Delcassi, L, Semeraro, F. A Novel Device to Exploit the  
54496 Smartphone Camera for Fundus Photography. *J Ophthalmol*. 2015;2015:823139.
- 55497 24. Baranwal, A, Anand, A, Singh, R, et al. Managing the Earth's Biggest Mass Gathering Event and WASH  
56498 Conditions: Maha Kumbh Mela (India). *PLoS Curr*. 2015;7.

- 1  
2 499 25. Nitzan, M, Romem, A, Koppel, R. Pulse oximetry: fundamentals and technology update. *Med Devices*  
3 500 (Auckl). 2014;7:231-9.
- 4 501 26. Gagnon, C, Mathieu, J, Desrosiers, J. Standardized finger-nose test validity for coordination assessment  
5 502 in an ataxic disorder. *Can J Neurol Sci*. 2004;31(4):484-9.
- 6 503 27. Norman, KE, Heroux, ME. Measures of fine motor skills in people with tremor disorders: appraisal and  
7 504 interpretation. *Front Neurol*. 2013;4:50.
- 8 505 28. Salzman, B. Gait and balance disorders in older adults. *Am Fam Physician*. 2010;82(1):61-8.
- 9 506 29. Spaeth, GL, Henderer, J, Liu, C, et al. The disc damage likelihood scale: reproducibility of a new method  
10 507 of estimating the amount of optic nerve damage caused by glaucoma. *Trans Am Ophthalmol Soc*. 2002;100:181-  
12 508 5; discussion 5-6.
- 13 509 30. Clinical Guidelines on the Identification, Evaluation, and Treatment of Overweight and Obesity in Adults-  
14 510 -The Evidence Report. National Institutes of Health. *Obes Res*. 1998;6 Suppl 2:51S-209S.
- 15 511 31. Pickering, TG, Hall, JE, Appel, LJ, et al. Recommendations for blood pressure measurement in humans  
16 512 and experimental animals; part 1: blood pressure measurement in humans: a statement for professionals from  
17 513 the Subcommittee of Professional and Public Education of the American Heart Association Council on High Blood  
18 514 Pressure Research. *Circulation*. 2005;111(5):697-716.
- 19 515 32. Kumar, A, Kalra, S, Unnikrishnan, AG. Metabolic state of the nation: Results of the national family health  
20 516 survey-4. *Indian J Endocrinol Metab*. 2016;20(4):429-31.
- 22 517 33. Vold, ML, Aasebo, U, Melbye, H. Low FEV1, smoking history, and obesity are factors associated with  
23 518 oxygen saturation decrease in an adult population cohort. *Int J Chron Obstruct Pulmon Dis*. 2014;9:1225-33.
- 24 519 34. DeStefano, F, Anda, RF, Kahn, HS, Williamson, DF, Russell, CM. Dental disease and risk of coronary heart  
25 520 disease and mortality. *BMJ*. 1993;306(6879):688-91.
- 26 521 35. Mendez, MV, Scott, T, LaMorte, W, et al. An association between periodontal disease and peripheral  
27 522 vascular disease. *Am J Surg*. 1998;176(2):153-7.
- 28 523 36. Jampani, ND, Nutalapati, R, Dontula, BS, Boyapati, R. Applications of teledentistry: A literature review  
29 524 and update. *J Int Soc Prev Community Dent*. 2011;1(2):37-44.
- 31 525 37. Veerasamy, A, Kirk, R, Gage, J. Epidemiology of dental caries among adolescents in Tamil Nadu, India. *Int*  
32 526 *Dent J*. 2016;66(3):169-77.
- 33 527 38. George, R, Ve, RS, Vijaya, L. Glaucoma in India: estimated burden of disease. *J Glaucoma*.  
34 528 2010;19(6):391-7.
- 35 529 39. Mbao, MN, Eikelboom, RH, Atlas, MD, Gallop, MA. Evaluation of video-otoscopes suitable for tele-  
36 530 otology. *Telemed J E-Health*. 2003;9(4):325-30.
- 37 531 40. Gourie-Devi, M. Epidemiology of neurological disorders in India: review of background, prevalence and  
38 532 incidence of epilepsy, stroke, Parkinson's disease and tremors. *Neurol India*. 2014;62(6):588-98.

40 533

41

42

43

44

45

46

47

48

49

50

51

52

53

54

55

56

57

58

59

60



Fig 1. Study design. Flowchart for overall screening procedure.

25x9mm (300 x 300 DPI)

For peer review only





Fig 2. Representative images of labeled conditions detected in technology-enabled screenings.  
(A) Normal images for technology-enabled screenings. Left-to-right, top-to-bottom: dental, periodontal, tympanic membrane, optic nerve.  
(B) Labeled conditions for technology-enabled screenings. Left-to-right, top-to-bottom: caries, missing teeth, periodontal disease, perforated eardrum, effusion, width of optic rim 0.01-0.1.

149x38mm (300 x 300 DPI)

Peer review only

1  
2 **1 Supplementary Appendix**

3 2

4 3 Contents

5 4 Page 2: Supplementary Methods

6 5 Page 5: Supplementary Figures

7 6 Page 7: Supplementary Tables

8  
9  
10  
11  
12  
13  
14  
15  
16  
17  
18  
19  
20  
21  
22  
23  
24  
25  
26  
27  
28  
29  
30  
31  
32  
33  
34  
35  
36  
37  
38  
39  
40  
41  
42  
43  
44  
45  
46  
47  
48  
49  
50  
51  
52  
53  
54  
55  
56  
57  
58  
59  
60

For peer review only

## Supplementary Methods

**Criteria, ethical considerations and consent procedure:** Mahatma Gandhi Vidyamandir Karmaveer Bhausaheb Hiray Dental College & Hospital (MGVKBHDC) in Nashik was designated as one of the primary health provision and disaster management centers for the 2015 Sinhasht Kumbh Mela (14 July-25 September). The hospital has an outpatient facility where pilgrims and local people were provided care, information and a resting area throughout the event. Indians between the ages of 18 years and 90 years of all ethnicities, races and genders were included in the study. Subjects younger than 18 years or older than 90 years were excluded from participation. 494 consenting adults were seen in the week that MGVKBHDC was soliciting volunteers. We anticipated pilgrims and out-of-state consenting adults would be the largest group to volunteer to be enrolled in this study, allowing us to examine inhabitants from all over the county, but local Indians were also allowed to participate. MGVKBHDC institutional human subjects review committee approved our consent procedure, clinical data collection and the plan for communication of testing results with the subjects (Protocol number: MGVKBHDC/15-16/571). Bilingual physicians from MGVKBHDC explained the scope of the study and consent forms (in English or Hindi) to subjects who were interested in participating. Subjects were asked to sign the consent forms and then remain in a waiting area before active participation in the study. Participants were free to leave at any point during their screenings. MGVKBHDC primary care physicians, dentists, ophthalmologists, otolaryngologists and neurologists performed the health screenings in the order outlined in **Fig 1**, communicated the results to subjects and provided appropriate referrals to patients needing additional medical care. De-identified data was transferred to the Massachusetts Institute of Technology (MIT) investigators for analysis after approval of the protocol by the MIT Committee on the Use of Humans as Experimental Subjects (MIT COUHES protocol number: 1512338971).

**Data collection:** A unique registration number (1-494) linked to each subject was used to store and annotate data from screening kiosks.

**Medical history and routine health screenings:** Self-reported responses of subjects to a detailed computerized questionnaire that included geographic and demographic questions, questions about past medical history and current illnesses. A bilingual physician recorded the medications and symptoms reported by the subjects as well as their reports of family medical history. An Omron 10 series wireless upper arm monitor with cuff (Model: BP786N) was used to collect systolic and diastolic blood pressure following the manufacturer's instructions (Omron Electronics, USA). Temperatures were measured using a digital thermometer. Height and body weight were measured using a digital scale and were recorded for all subjects.

### Technology-enabled screening devices:

**Blood oxygen saturation:** A CMS 50-DL Pulse Oximeter (Contec Medical Systems, USA) was used to measure blood oxygen saturation levels of hemoglobin based on photoplethysmographic pulses and pulse rate from subjects' right index fingertips [25].

**ECG:** The AliveCor Mobile ECG (AliveCor Inc, USA) is a single-channel cardiac event recorder consisting of a device and smartphone app that can record and review ECGs [17]. a 30-second rhythm strip (lead I) recording was uploaded wirelessly for interpretation via the AliveCor algorithm, and an ECG analysis that indicated heart rate and presence of possible atrial fibrillation was displayed on the mobile phone. Before each use, a physician cleaned the two electrodes with alcohol-based sanitizer and launched the app on the smartphone (Nexus5, LG, South Korea).

**Tympanic membrane imaging:** Inspection of the external ear canal and eardrum was performed using the iPhone5 LEDs and camera with the CellScope Oto phone adapter (CellScope Inc. USA) [20]. A disposable ear tip attached to the device canula was used for imaging each subject.

**Oral imaging:** A commercially available FDA-approved intraoral camera with software, SOPROCARE (SOPRO Acteon Imaging, France), that automatically segments and displays images of plaque, caries and periodontal diseases was used [18]. Panning 30-second videos of the buccal surfaces of the upper first molars (16, 26), the buccal surface of the upper laterals (12, 22), the buccal surface of first lower molars (36, 46), as well as incisal, buccal and lingual surfaces of all accessible teeth were collected. The housing of the camera stick was covered in a clear disposable plastic sheath (U-line, USA) and sterile disposable camera bag. Subjects and clinicians wore UV protective eyewear during oral imaging. Images and video were collected by each of the following modes: (A) only 405nm LEDs powered, (B) only 450nm LEDs powered, (C) only white

LEDs powered. A HP 620 Notebook (Hewlett Packard, USA), Windows 7, (Microsoft Corporation, USA) with preloaded SOPROCARE software was used to store images and videos. A specialized scale for assigning patient scores vs. conventional DMFT (number of decayed, missing and filled teeth in an individual and in a population) or the Russell's periodontal indices was used by dentist examining the data. The camera system uses standard white light and three blue LEDs that emit non-ionizing light at 450 nm wavelengths. Inflamed gingiva can be scored due to fluorescence from porphyrins in blood. Illumination of microbial plaque with blue light induces fluorescence due to the bacteria and porphyrin content of the plaque.

**Optic nerve head photography:** Non-mydratic digital retinal imaging using the D-EYE (D-EYE Srl, USA) direct ophthalmoscopy adapter attached to iPhone5s camera was performed to capture video and still images of optic nerves of subjects [23].

**Gait and coordination analyses:** The Microsoft Kinect (Microsoft Corporation, USA) sensor has an RGB camera, depth sensor and multi-array microphone, which provide full-body 3D motion capture, facial and voice recognition capabilities [19]. A 2D, depth and skeleton motion dataset of motor skills, hand-eye coordination, depth perception, neuromuscular stability of individual subjects was captured by the following protocol: a) finger-nose test with index finger touching a ball suspended from the ceiling two feet in front and then the nose: to identify tremors, incoordination, and dysmetria [26]; b) finger-count dexterity test to count to five using thumb touching fingertips: to detect slowness, tremors, and incoordination [27]; c) holding out hands steadily with palms facing down: to detect tremors and arm drift (upward, downward and lateral) [27], d) walking a distance of 2.5 meters in a straight line, turning around and walking back: to identify subjects who have posture abnormalities, tremors, imbalance (left/right), a penguin gait, or an asymmetric gait while walking [28]. Kinect sensors placed in front of and behind subjects were used to capture the walking in straight-line actions (**Supplementary Fig 1B**). For all other tests, one Kinect sensor was placed unobtrusively to the left or right of the subjects (**Supplementary Fig 1A**).

**Data analyses:** De-identified data assigned to unique subject IDs was split into five separate pools consisting of optic nerve, tympanic membrane, ear, oral and neurological videos for all study participants. BMI, blood pressure, resting heart rate and body temperature are routinely measured without sophisticated TES by most primary care providers and have been collectively annotated as "routine health screenings" throughout this study. Other imaging and smartphone-based tests have been designated as TES methods. Routine health screenings and responses to medical questionnaires were grouped together for computational analyses. Resting heart rate and temperature have clinically well-defined normal, high and low ranges. For BMI, numbers less than 19 were labeled low, between 19 and 25 were characterized as normal, and 25 and above were considered high [30]. For blood pressure, systolic pressure below 90 mmHg or diastolic pressure below 60 mmHg was considered low, systolic pressure between 90 and 140 mmHg and diastolic pressure between 60 and 90 mmHg was labeled normal, and systolic pressure above 140 mmHg or diastolic pressure above 90 mmHg was labeled high [31]. Blood oxygen levels of 90% or less were annotated low. The outputs from the AliveCor mobile app were readily used as annotations for ECG tests because they were labeled 'Normal' or 'Possible atrial fibrillation' [25].

Videos captured by TES devices were categorized by patient ID and TES examination and displayed directly to expert physicians via a web-based examination portal conducted diagnostic feature annotation of de-identified images and videos. This password-protected secure interface was developed using web technologies (HTML, JavaScript, node.js) for this purpose and displayed an image or video for one patient at a time for a given examination. Annotators were able to mark specific features in the videos by drawing boxes around them that paused that specific frame, assign an overall score of 1 (best) to 5 (worst) for the entire video, and to write clinical features that were present for specific frames or the entire video (**Supplementary Fig 2**). A panel of at least three physicians for each type of examination was assembled and independently of each other remotely annotated the data facilitated by the web interface. Due to the greater quantity of Microsoft Kinect videos, three physician-trained raters annotated all the videos, and then an expert physician ratified their labels. The interface for optic nerve videos used a previously described Disc Damage Likelihood Scale (DDLS) scale for glaucoma screening [29]. The majority ratings for each subject were computed for all TES tests. For subjects with no majority rating, the lesser of the tied ratings was chosen to not overstate the prevalence of diagnosed illnesses. Results from each test were analyzed for cross-correlations with self-reported medical history responses, age and sex. Clinical findings for individuals who were tested at all six screening kiosks were also analyzed to generate population health profiles. Efficacy of routine health screenings vs. TES to identify at-risk or sick individuals examined during the study is discussed in the manuscript. Conditions outside the normal range identified by physicians for each TES test are as follows. Oral imaging: caries, missing teeth, periodontal disease;

1  
2 108 tympanic membrane imaging: perforated eardrum, effusion; optic nerve head photography: width of optic rim 0.01-0.1;  
3 109 coordination analyses: abnormal finger-nose test.  
4 110

5 111 **Statistical methods:** Fisher's exact test was used to determine statistically significant correlations between diagnoses using  
6 112 TES or routine health screenings and number, age, sex and questionnaire responses of participating subjects. The significance  
7 113 threshold was set at  $p < 0.05$ . To determine in **Supplementary Table 7** whether high BMI was statistically more prevalent in  
8 114 one particular age cohort (out of a total of four age groups), we calculated four proportions representing the number of  
9 115 subjects in a specific age cohort who had high BMI compared to the total number of subjects in that age cohort. Each  
10 116 proportion was compared pairwise using Fisher's exact test, which reported  $p$ -values of 0.0014 and 0.0052 when comparing  
11 117 the proportion from the middle age cohort to the proportions from the young adult and old age cohorts, respectively. In  
12 118 **Supplementary Table 8** to determine that there is a statistically significant correlation between a subject being measured for  
13 119 high BMI and responding that they wear glasses, we calculated two proportions: 1) the number of subjects who had high  
14 120 BMI and said they wear glasses (115) compared to the total number of subjects with high BMI (196), and 2) the number of  
15 121 subjects who did not have high BMI and said they wear glasses (132) compared to the number of subjects who did not have  
16 122 high BMI regardless of whether they wear glasses (298). Fisher's exact test reported a  $p$ -value of 0.0024 when comparing  
17 123 these proportions, so we conclude that the correlation between high BMI and wearing glasses is significant. Analyses were  
18 124 performed on groups of subjects who completed each individual test to avoid considering subjects who did not have that test  
19 125 performed.  
20 126  
21  
22  
23  
24  
25  
26  
27  
28  
29  
30  
31  
32  
33  
34  
35  
36  
37  
38  
39  
40  
41  
42  
43  
44  
45  
46  
47  
48  
49  
50  
51  
52  
53  
54  
55  
56  
57  
58  
59  
60



**Supplementary Fig 1.** Diagram of Microsoft Kinect placement for gait and coordination screening tests.

(A) Finger-nose test, from the side. Both the Kinect and ball are centered over the table with the patient facing the ball and the Kinect.

(B) Gait test, top-down. Both Kinects are 1 m off the ground and the subject walks in a straight line between them.

**Subject ID: 1**

Please select eye health of subject using Disc Damage Likelihood scale!

- 0 Narrowest width of rim 0.3 - 0.5 (Excellent)
- 1 Narrowest width of rim 0.2 - 0.29
- 2 Narrowest width of rim 0.1 - 0.19
- 3 Narrowest width of rim 0.01 - 0.1
- 4 No rim < 45°
- 5 No rim 45° - 90°
- 6 No rim 91° - 180°
- 7 No rim > 181° (Worst)

**Table of Annotations:**

In case of issues, Please hit refresh!

Frame Normal Annotation Add / Remove ?

[Instructions](#) [Logout](#)

Previous Save! Replay Next

Normal  Abnormal  Frame no [0]

Comment  Add Annotation

**Subject ID: 35**

Please select overall health of subject from this video!

- 1 (Excellent)
- 2
- 3
- 4
- 5 (Worst)

**Table of Annotations:**

In case of issues, Please hit refresh!

Frame Normal Annotation Add / Remove ?

[Instructions](#) [Logout](#)

Previous Save! Replay Next

Normal  Abnormal  Frame no [117]

Comment  Add Annotation

**Subject ID: 5**

Please select overall health of subject from this video!

- 1 (Excellent)
- 2
- 3
- 4
- 5 (Worst)

**Table of Annotations:**

In case of issues, Please hit refresh!

Frame Normal Annotation Add / Remove ?

[Instructions](#) [Logout](#)

Previous Save! Replay Next

Normal  Abnormal  Frame no [78]

Comment  Add Annotation

**Subject ID: 237**

Please select overall health of subject from this video!

- 1. (Best) Healthy teeth and gums, with no visible signs of plaque, caries and gingivitis/bleeding.
- 2. Dental plaque visible on several teeth.
- 3. Plaque + mild inflammation of gums, maybe some early carious lesions
- 4. Plaque + calculus, early gingivitis, mild localized bleeding
- 5. Calculus + tartar, loss of several teeth, prevalent decay, profound gingivitis, bleeding, early stage periodontal disease.
- 6. (Worst) Loss of several teeth, advanced periodontal disease, profound decay etc.

**Permanent Teeth**

**Supplementary Fig 2.** Web interfaces for remote annotation used by physician experts for clinical evaluations. Clockwise from top left: retinal scan, tympanic membrane imaging, gait and coordination tests, oral imaging



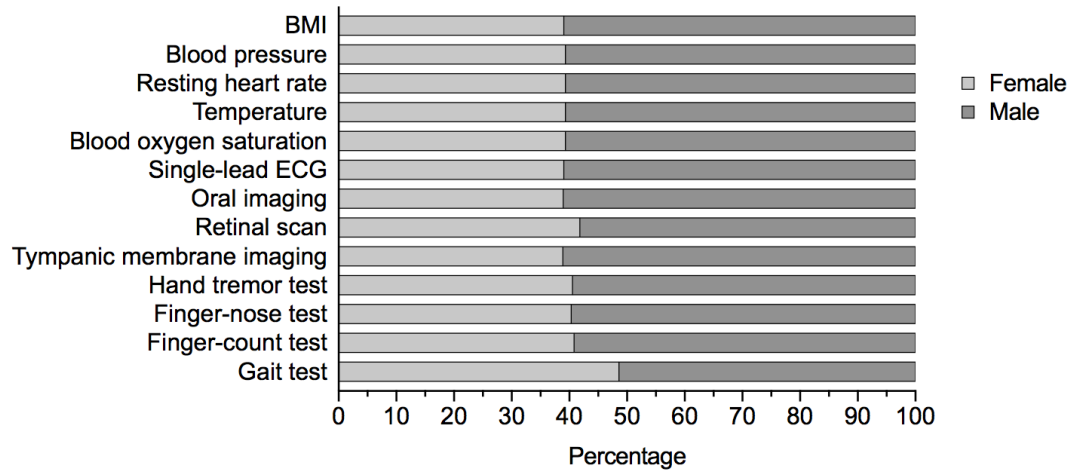

Supplementary Fig 3. Percentage of test populations of each gender.

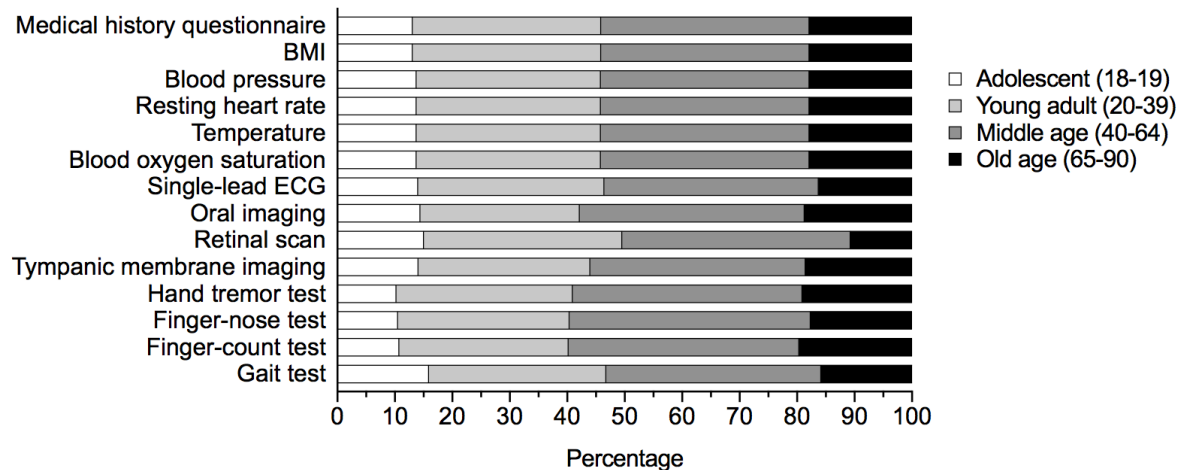

Supplementary Fig 4. Percentage of test populations in each age cohort. Age ranges for each cohort are in parentheses.

Supplementary Table 1. Test populations divided by gender and age cohorts.

|                               | Adolescent (18-19) |      |       | Young adult (20-39) |      |       | Middle age (40-64) |      |       | Old age (65-90) |      |       |
|-------------------------------|--------------------|------|-------|---------------------|------|-------|--------------------|------|-------|-----------------|------|-------|
|                               | Female             | Male | Total | Female              | Male | Total | Female             | Male | Total | Female          | Male | Total |
| Medical history               | 39                 | 26   | 65    | 64                  | 88   | 152   | 73                 | 115  | 188   | 17              | 72   | 89    |
| Body mass index               | 39                 | 26   | 65    | 64                  | 88   | 152   | 73                 | 115  | 188   | 17              | 72   | 89    |
| Blood pressure                | 38                 | 25   | 63    | 56                  | 81   | 137   | 69                 | 104  | 173   | 16              | 66   | 82    |
| Resting heart rate            | 38                 | 25   | 63    | 56                  | 81   | 137   | 69                 | 104  | 173   | 16              | 66   | 82    |
| Temperature                   | 38                 | 25   | 63    | 56                  | 81   | 137   | 69                 | 104  | 173   | 16              | 66   | 82    |
| Blood oxygen saturation       | 38                 | 25   | 63    | 56                  | 81   | 137   | 69                 | 104  | 173   | 16              | 66   | 82    |
| Single-lead electrocardiogram | 36                 | 25   | 61    | 58                  | 81   | 139   | 60                 | 100  | 160   | 14              | 56   | 70    |
| Oral imaging                  | 37                 | 22   | 59    | 43                  | 71   | 114   | 65                 | 96   | 161   | 15              | 62   | 77    |
| Retinal scan                  | 37                 | 23   | 60    | 61                  | 79   | 140   | 63                 | 97   | 160   | 8               | 36   | 44    |
| Tympanic membrane imaging     | 30                 | 9    | 39    | 35                  | 52   | 87    | 49                 | 80   | 129   | 12              | 57   | 69    |
| Hand tremor test              | 24                 | 8    | 32    | 41                  | 55   | 96    | 50                 | 75   | 125   | 12              | 48   | 60    |
| Finger-nose test              | 24                 | 8    | 32    | 37                  | 54   | 91    | 50                 | 78   | 128   | 12              | 42   | 54    |
| Finger-count test             | 24                 | 8    | 32    | 36                  | 52   | 88    | 49                 | 71   | 120   | 13              | 46   | 59    |
| Gait test                     | 30                 | 4    | 34    | 33                  | 33   | 66    | 34                 | 46   | 80    | 7               | 27   | 34    |

Age ranges in years for each age cohort are in parentheses.



**Supplementary Table 2. Gender breakdown of self-reported medical history.**

|                                       | Female (n=193) | Male (n=301) | Total (n=494) |
|---------------------------------------|----------------|--------------|---------------|
| Glasses                               | 54.9           | 46.8         | 50.0          |
| Dental                                | 21.2           | 29.2         | 26.1          |
| Swollen joints                        | 25.4           | 25.2         | 25.3          |
| Hearing                               | 17.1           | 24.9         | 21.9          |
| Family history of diabetes            | 22.3           | 18.3         | 19.8          |
| Leg cramps                            | 19.7           | 17.9         | 18.6          |
| Family history of high blood pressure | 21.2           | 12.6         | 16.0          |
| Fatigue                               | 15.5           | 15.6         | 15.6          |
| Acidity                               | 20.2           | 11.3         | 14.8          |
| Tiredness                             | 13.0           | 15.0         | 14.2          |
| Tobacco addiction                     | 1.6            | 17.6         | 11.3          |
| Surgery                               | 9.8            | 10.0         | 9.9           |
| Difficulty walking                    | 10.4           | 9.6          | 9.9           |
| High blood pressure                   | 10.4           | 8.0          | 8.9           |
| Diabetes                              | 6.7            | 8.6          | 7.9           |
| Snore Loudly                          | 4.7            | 9.3          | 7.5           |
| High blood pressure treatment         | 7.3            | 5.6          | 6.3           |
| Environmental allergies               | 8.3            | 4.3          | 5.9           |
| Sleepiness                            | 5.2            | 5.6          | 5.5           |
| Medication allergies                  | 6.2            | 4.7          | 5.3           |
| Asthma                                | 4.7            | 5.0          | 4.9           |
| Smoking addiction                     | 0.0            | 7.6          | 4.7           |
| Family history of cardiac diseases    | 3.1            | 3.3          | 3.2           |
| Family history of asthma              | 3.1            | 3.0          | 3.0           |
| Thyroid                               | 5.7            | 1.0          | 2.8           |
| Self-medication                       | 1.0            | 4.0          | 2.8           |
| Jewelry allergies                     | 6.2            | 0.0          | 2.4           |
| Past skin infection                   | 3.1            | 2.0          | 2.4           |
| Family history of thyroid disease     | 2.1            | 2.3          | 2.2           |
| Cardiac treatment                     | 1.0            | 2.7          | 2.0           |
| Stop breathing during sleep           | 1.0            | 2.3          | 1.8           |
| Oral infection                        | 1.6            | 2.0          | 1.8           |
| Kidney disorder                       | 2.1            | 1.3          | 1.6           |
| Skin problem                          | 1.0            | 2.0          | 1.6           |
| Skin infection                        | 0.5            | 2.0          | 1.4           |
| Food allergies                        | 1.6            | 1.3          | 1.4           |
| Hyperactivity                         | 2.1            | 1.0          | 1.4           |
| Cardiovascular                        | 0.5            | 1.7          | 1.2           |
| Migraine                              | 2.1            | 0.7          | 1.2           |
| Low blood pressure                    | 2.6            | 0.3          | 1.2           |
| Family history of stroke              | 2.1            | 0.3          | 1.0           |
| Past ear infection                    | 0.5            | 1.0          | 0.8           |
| Family history of eye disease         | 0.5            | 1.0          | 0.8           |
| Heart attack                          | 0.0            | 1.3          | 0.8           |
| Material allergies                    | 1.0            | 0.7          | 0.8           |
| Anxiety                               | 0.5            | 1.0          | 0.8           |
| Injury in past 6 months               | 0.5            | 1.0          | 0.8           |
| Family history of depression          | 1.0            | 0.3          | 0.6           |
| Coronary bypass surgery               | 0.0            | 1.0          | 0.6           |
| Attention deficit disorder            | 1.0            | 0.3          | 0.6           |
| Drinking addiction                    | 0.0            | 1.0          | 0.6           |
| Eye treatment                         | 0.5            | 0.3          | 0.4           |
| Family history of skin disease        | 0.5            | 0.3          | 0.4           |
| Memory loss                           | 1.0            | 0.0          | 0.4           |
| Ear treatment                         | 0.5            | 0.3          | 0.4           |
| Lung diseases                         | 0.5            | 0.3          | 0.4           |
| Family history of ear disease         | 0.0            | 0.7          | 0.4           |
| Cancer                                | 0.5            | 0.0          | 0.2           |
| Sexually transmitted disease          | 0.0            | 0.3          | 0.2           |
| Liver disease                         | 0.5            | 0.0          | 0.2           |
| Skin treatment                        | 0.5            | 0.0          | 0.2           |
| Past gastric infection                | 0.0            | 0.3          | 0.2           |
| Depression                            | 0.0            | 0.0          | 0.0           |
| Sleep disorder treatment              | 0.0            | 0.0          | 0.0           |
| Heart murmur                          | 0.0            | 0.0          | 0.0           |
| Past lung infection                   | 0.0            | 0.0          | 0.0           |

Percentage of total population by gender who answered yes to each medical history question.

Supplementary Table 3. Age cohort breakdown of self-reported medical history.

|                                       | Adolescent (18-19) | Young adult (20-39) | Middle age (40-64) | Old age (65-90) |
|---------------------------------------|--------------------|---------------------|--------------------|-----------------|
| Glasses                               | 11                 | 21                  | 47                 | 21              |
| Dental                                | 3                  | 22                  | 53                 | 22              |
| Swollen joints                        | 0                  | 10                  | 51                 | 38              |
| Hearing                               | 1                  | 7                   | 50                 | 42              |
| Family history of diabetes            | 17                 | 44                  | 34                 | 5               |
| Leg cramps                            | 0                  | 15                  | 47                 | 38              |
| Family history of high blood pressure | 18                 | 46                  | 33                 | 4               |
| Fatigue                               | 1                  | 21                  | 55                 | 23              |
| Acidity                               | 5                  | 30                  | 47                 | 18              |
| Tiredness                             | 3                  | 21                  | 53                 | 23              |
| Tobacco addiction                     | 0                  | 18                  | 46                 | 36              |
| Surgery                               | 8                  | 18                  | 37                 | 37              |
| Difficulty walking                    | 0                  | 2                   | 49                 | 49              |
| High blood pressure                   | 0                  | 9                   | 57                 | 34              |
| Diabetes                              | 0                  | 15                  | 64                 | 21              |
| Snore Loudly                          | 0                  | 27                  | 65                 | 8               |
| High blood pressure treatment         | 0                  | 6                   | 55                 | 39              |
| Environmental allergies               | 17                 | 41                  | 34                 | 7               |
| Sleepiness                            | 4                  | 7                   | 63                 | 26              |
| Medication allergies                  | 15                 | 15                  | 54                 | 15              |
| Asthma                                | 0                  | 4                   | 67                 | 29              |
| Smoking addiction                     | 0                  | 9                   | 52                 | 39              |
| Family history of cardiac diseases    | 6                  | 38                  | 38                 | 19              |
| Family history of asthma              | 13                 | 13                  | 67                 | 7               |
| Thyroid                               | 0                  | 14                  | 64                 | 21              |
| Self-medication                       | 0                  | 29                  | 50                 | 21              |
| Jewelry allergies                     | 0                  | 33                  | 67                 | 0               |
| Past skin infection                   | 8                  | 25                  | 50                 | 17              |
| Family history of thyroid disease     | 18                 | 55                  | 9                  | 18              |
| Cardiac treatment                     | 0                  | 20                  | 40                 | 40              |
| Stop breathing during sleep           | 0                  | 33                  | 33                 | 33              |
| Oral infection                        | 0                  | 11                  | 67                 | 22              |
| Kidney disorder                       | 13                 | 13                  | 50                 | 25              |
| Skin problem                          | 0                  | 0                   | 50                 | 50              |
| Skin infection                        | 0                  | 29                  | 57                 | 14              |
| Food allergies                        | 0                  | 29                  | 57                 | 14              |
| Hyperactivity                         | 14                 | 29                  | 57                 | 0               |
| Cardiovascular                        | 0                  | 33                  | 67                 | 0               |
| Migraine                              | 17                 | 83                  | 0                  | 0               |
| Low blood pressure                    | 17                 | 17                  | 67                 | 0               |
| Family history of stroke              | 20                 | 60                  | 20                 | 0               |
| Past ear infection                    | 0                  | 75                  | 0                  | 25              |
| Family history of eye disease         | 0                  | 75                  | 25                 | 0               |
| Heart attack                          | 0                  | 25                  | 25                 | 50              |
| Material allergies                    | 0                  | 75                  | 25                 | 0               |
| Anxiety                               | 0                  | 50                  | 50                 | 0               |
| Injury in past 6 months               | 25                 | 0                   | 75                 | 0               |
| Family history of depression          | 33                 | 67                  | 0                  | 0               |
| Coronary bypass surgery               | 0                  | 0                   | 33                 | 67              |
| Attention deficit disorder            | 0                  | 0                   | 100                | 0               |
| Drinking addiction                    | 0                  | 0                   | 67                 | 33              |
| Eye treatment                         | 0                  | 0                   | 0                  | 100             |
| Family history of skin disease        | 0                  | 50                  | 50                 | 0               |
| Memory loss                           | 0                  | 0                   | 50                 | 50              |
| Ear treatment                         | 0                  | 0                   | 100                | 0               |
| Lung diseases                         | 0                  | 0                   | 50                 | 50              |
| Family history of ear disease         | 0                  | 50                  | 0                  | 50              |
| Cancer                                | 0                  | 0                   | 100                | 0               |
| Sexually transmitted disease          | 0                  | 100                 | 0                  | 0               |
| Liver disease                         | 0                  | 0                   | 100                | 0               |
| Skin treatment                        | 0                  | 100                 | 0                  | 0               |
| Past gastric infection                | 0                  | 0                   | 100                | 0               |
| Depression                            | 0                  | 0                   | 0                  | 0               |
| Sleep disorder treatment              | 0                  | 0                   | 0                  | 0               |
| Heart murmur                          | 0                  | 0                   | 0                  | 0               |
| Past lung infection                   | 0                  | 0                   | 0                  | 0               |

Distribution of subjects, in percentages, who responded yes to a medical history question across age cohorts.  
Age ranges in years for each age cohort are in parentheses.

**Supplementary Table 4. Percentage of subjects in each age cohort who responded yes to a medical history question.**

|                                       | Adolescent (18-19) | Young adult (20-39) | Middle age (40-64) | Old age (65-90) |
|---------------------------------------|--------------------|---------------------|--------------------|-----------------|
| Glasses                               | 43                 | 34                  | 62                 | 57              |
| Dental                                | 6                  | 18                  | 36                 | 33              |
| Swollen joints                        | 0                  | 9                   | 34                 | 54              |
| Hearing                               | 2                  | 5                   | 29                 | 51              |
| Family history of diabetes            | 26                 | 28                  | 18                 | 6               |
| Leg cramps                            | 0                  | 9                   | 23                 | 39              |
| Family history of high blood pressure | 22                 | 24                  | 14                 | 3               |
| Fatigue                               | 2                  | 11                  | 22                 | 20              |
| Acidity                               | 6                  | 14                  | 18                 | 15              |
| Tiredness                             | 3                  | 10                  | 20                 | 18              |
| Tobacco addiction                     | 0                  | 7                   | 14                 | 22              |
| Surgery                               | 6                  | 6                   | 10                 | 20              |
| Difficulty walking                    | 0                  | 1                   | 13                 | 27              |
| High blood pressure                   | 0                  | 3                   | 13                 | 17              |
| Diabetes                              | 0                  | 4                   | 13                 | 9               |
| Snore Loudly                          | 0                  | 7                   | 13                 | 3               |
| High blood pressure treatment         | 0                  | 1                   | 9                  | 13              |
| Environmental allergies               | 8                  | 8                   | 5                  | 2               |
| Sleepiness                            | 2                  | 1                   | 9                  | 8               |
| Medication allergies                  | 6                  | 3                   | 7                  | 4               |
| Asthma                                | 0                  | 1                   | 9                  | 8               |
| Smoking addiction                     | 0                  | 1                   | 6                  | 10              |
| Family history of cardiac diseases    | 2                  | 4                   | 3                  | 3               |
| Family history of asthma              | 3                  | 1                   | 5                  | 1               |
| Thyroid                               | 0                  | 1                   | 5                  | 3               |
| Self-medication                       | 0                  | 3                   | 4                  | 3               |
| Jewelry allergies                     | 0                  | 3                   | 4                  | 0               |
| Past skin infection                   | 2                  | 2                   | 3                  | 2               |
| Family history of thyroid disease     | 3                  | 4                   | 1                  | 2               |
| Cardiac treatment                     | 0                  | 1                   | 2                  | 4               |
| Stop breathing during sleep           | 0                  | 2                   | 2                  | 3               |
| Oral infection                        | 0                  | 1                   | 3                  | 2               |
| Kidney disorder                       | 2                  | 1                   | 2                  | 2               |
| Skin problem                          | 0                  | 0                   | 2                  | 4               |
| Skin infection                        | 0                  | 1                   | 2                  | 1               |
| Food allergies                        | 0                  | 1                   | 2                  | 1               |
| Hyperactivity                         | 2                  | 1                   | 2                  | 0               |
| Cardiovascular                        | 0                  | 1                   | 2                  | 0               |
| Migraine                              | 2                  | 3                   | 0                  | 0               |
| Low blood pressure                    | 2                  | 0.7                 | 2                  | 0               |
| Family history of stroke              | 2                  | 2                   | 1                  | 0               |
| Past ear infection                    | 0                  | 2                   | 0                  | 1               |
| Family history of eye disease         | 0                  | 2                   | 0.5                | 0               |
| Heart attack                          | 0                  | 0.7                 | 0.5                | 2               |
| Material allergies                    | 0                  | 2                   | 0.5                | 0               |
| Anxiety                               | 0                  | 1                   | 1                  | 0               |
| Injury in past 6 months               | 2                  | 0                   | 2                  | 0               |
| Family history of depression          | 2                  | 1                   | 0                  | 0               |
| Coronary bypass surgery               | 0                  | 0                   | 0.5                | 2               |
| Attention deficit disorder            | 0                  | 0                   | 2                  | 0               |
| Drinking addiction                    | 0                  | 0                   | 1                  | 1               |
| Eye treatment                         | 0                  | 0                   | 0                  | 2               |
| Family history of skin disease        | 0                  | 0.7                 | 0.5                | 0               |
| Memory loss                           | 0                  | 0                   | 0.5                | 1               |
| Ear treatment                         | 0                  | 0                   | 1                  | 0               |
| Lung diseases                         | 0                  | 0                   | 0.5                | 1               |
| Family history of ear disease         | 0                  | 0.7                 | 0                  | 1               |
| Cancer                                | 0                  | 0                   | 0.5                | 0               |
| Sexually transmitted disease          | 0                  | 0.7                 | 0                  | 0               |
| Liver disease                         | 0                  | 0                   | 0.5                | 0               |
| Skin treatment                        | 0                  | 0.7                 | 0                  | 0               |
| Past gastric infection                | 0                  | 0                   | 0.5                | 0               |
| Depression                            | 0                  | 0                   | 0                  | 0               |
| Sleep disorder treatment              | 0                  | 0                   | 0                  | 0               |
| Heart murmur                          | 0                  | 0                   | 0                  | 0               |
| Past lung infection                   | 0                  | 0                   | 0                  | 0               |

Age ranges in years for each age cohort are in parentheses.

**Supplementary Table 5. Numbers of subjects in each age cohort identified by routine health screenings.**

|          | Adolescent (18-19) |      |       | Young adult (20-39) |      |       | Middle age (40-64) |      |       | Old age (65-90) |      |       |
|----------|--------------------|------|-------|---------------------|------|-------|--------------------|------|-------|-----------------|------|-------|
|          | Female             | Male | Total | Female              | Male | Total | Female             | Male | Total | Female          | Male | Total |
| High BMI | 10                 | 11   | 21    | 15                  | 35   | 50    | 43                 | 57   | 100   | 7               | 18   | 25    |
| Low BMI  | 11                 | 6    | 17    | 19                  | 9    | 28    | 7                  | 13   | 20    | 5               | 19   | 24    |
| High BP  | 0                  | 1    | 1     | 4                   | 12   | 16    | 15                 | 30   | 45    | 7               | 19   | 26    |
| Low BP   | 1                  | 0    | 1     | 2                   | 0    | 2     | 0                  | 1    | 1     | 0               | 0    | 0     |

Age ranges in years for each age cohort are in parentheses.

**Supplementary Table 6. Percentages of subjects with each condition in our study and in each encompassing region from the National Family and Health Survey 4 (NFHS4).**

|                   | High BMI |       | Low BMI |       | High BP |       |
|-------------------|----------|-------|---------|-------|---------|-------|
|                   | Female   | Male  | Female  | Male  | Female  | Male  |
| Our study         | 38.9%    | 40.2% | 21.8%   | 15.6% | 14.5%   | 22.5% |
| NFHS4 India       | 20.7%    | 18.6% | 22.9%   | 20.2% | 8.8%    | 13.6% |
| NFHS4 Maharashtra | 23.4%    | 23.8% | 23.5%   | 19.1% | 9.1%    | 15.9% |
| NFHS4 Nashik      | 22.9%    | 23.7% | 25.8%   | 16.8% | 5.7%    | 11%   |

**Supplementary Table 7. Statistically significant prevalence of clinical conditions identified by routine health screenings across age cohorts.**

| Condition | More prevalent in | Than in     | <i>p</i> -value | More prevalent cohort           |               | Less prevalent cohort           |               |
|-----------|-------------------|-------------|-----------------|---------------------------------|---------------|---------------------------------|---------------|
|           |                   |             |                 | No. with condition (percentage) | No. in cohort | No. with condition (percentage) | No. in cohort |
| High BMI  | Middle age        | Young adult | 0.0014          | 100 (59.5)                      | 168           | 50 (32.9)                       | 152           |
| High BMI  | Middle age        | Old age     | 0.0052          | 100 (59.5)                      | 168           | 25 (28.1)                       | 89            |
| High BP   | Young adult       | Adolescent  | 0.0147          | 16 (11.9)                       | 135           | 1 (1.5)                         | 65            |
| High BP   | Middle age        | Adolescent  | <0.0001         | 45 (26.2)                       | 172           | 1 (1.5)                         | 65            |
| High BP   | Middle age        | Young adult | 0.0023          | 45 (26)                         | 172           | 16 (10.5)                       | 152           |
| High BP   | Old age           | Adolescent  | <0.0001         | 26 (31.7)                       | 82            | 1 (1.5)                         | 65            |
| High BP   | Old age           | Young adult | 0.0006          | 52 (66.7)                       | 82            | 16 (10.5)                       | 152           |

Age ranges in years for each cohort: 18-19 for adolescents, 20-39 for young adults, 40-64 for middle age, and 65-90 for old age.

**Supplementary Table 8. Number of subjects with a routine health screening condition and responded yes to a medical history question.**

| Condition | No. with condition | Glasses | Dental | Swollen joints | Hearing | FH diabetes | FH high BP | Tobacco | Difficulty walking | High BP | Diabetes | High BP Rx | Asthma | Smoking | FH cardiac | Cardiac Rx | Cardiovascular | Low BP | FH stroke | FH eye disease | Heart attack | Coronary bypass | Drinking | Eye treatment | Memory loss | Ear treatment | FH ear disease | Cancer |
|-----------|--------------------|---------|--------|----------------|---------|-------------|------------|---------|--------------------|---------|----------|------------|--------|---------|------------|------------|----------------|--------|-----------|----------------|--------------|-----------------|----------|---------------|-------------|---------------|----------------|--------|
| High BMI  | 196                | 115*    | 48     | 52             | 38      | 48*         | 41*        | 23      | 19                 | 26*     | 18       | 17         | 9      | 3**     | 5          | 5          | 1              | 1      | 1         | 3              | 2            | 1               | 1        | 0             | 2           | 2             | 1              | 0      |
| Low BMI   | 89                 | 39      | 21     | 23             | 25      | 11          | 10         | 16*     | 12                 | 4       | 6        | 4          | 4      | 9*      | 1          | 1          | 0              | 2      | 1         | 0              | 0            | 0               | 1        | 0             | 0           | 0             | 0              |        |
| High BP   | 88                 | 54      | 24     | 30*            | 25      | 19          | 11         | 11      | 14*                | 17*     | 15*      | 14*        | 2      | 4       | 4          | 4          | 3              | 0      | 0         | 1              | 2            | 1               | 0        | 1             | 1           | 1             | 1              | 0      |
| Low BP    | 4                  | 3       | 1      | 1              | 1       | 2           | 1          | 0       | 1                  | 0       | 0        | 0          | 0      | 1       | 0          | 0          | 0              | 0      | 0         | 0              | 0            | 0               | 0        | 0             | 0           | 0             | 0              | 0      |

Total populations reflect the number of subjects with the particular condition in that row. Multiple subjects were associated with more than one condition or questionnaire response.

\*  $p < 0.05$ , subjects are more likely to have responded yes to the column's question and have the routine health screening abnormality.

\*\*  $p < 0.05$ , subjects are less likely to have responded yes to the column's question and have the routine health screening abnormality.

**Supplementary Table 9. Statistically significant correlations between routine health screening conditions and self-reported medical history.**

| Condition | Medical History    | <i>p</i> -value | Subjects with routine screening condition |                    | Subjects without routine screening condition |                       |
|-----------|--------------------|-----------------|-------------------------------------------|--------------------|----------------------------------------------|-----------------------|
|           |                    |                 | No. responded yes (percentage)            | No. with condition | No. responded yes (percentage)               | No. without condition |
| High BMI  | Glasses            | 0.0024          | 115 (58.7)                                | 196                | 132 (44.3)                                   | 298                   |
| High BMI  | FH diabetes        | 0.0384          | 48 (24.5)                                 | 196                | 50 (16.8)                                    | 298                   |
| High BMI  | FH High BP         | 0.0173          | 41 (20.9)                                 | 196                | 38 (12.8)                                    | 298                   |
| Low BMI   | Tobacco addiction  | 0.0406          | 16 (18.0)                                 | 89                 | 40 (9.9)                                     | 405                   |
| High BMI  | High BP            | 0.0091          | 26 (13.3)                                 | 196                | 18 (6.0)                                     | 298                   |
| Low BMI   | Smoking            | 0.0122          | 9 (10.1)                                  | 89                 | 14 (3.5)                                     | 405                   |
| High BMI  | Smoking            | 0.0077          | 3 (1.5)                                   | 196                | 20 (6.7)                                     | 298                   |
| High BP   | Glasses            | 0.0251          | 60 (68.2)                                 | 88                 | 179 (48.8)                                   | 367                   |
| High BP   | Swollen joints     | 0.0425          | 30 (34.1)                                 | 88                 | 89 (24.3)                                    | 367                   |
| High BP   | Difficulty walking | 0.0483          | 14 (15.9)                                 | 88                 | 33 (9.0)                                     | 367                   |
| High BP   | High BP            | 0.0006          | 17 (19.3)                                 | 88                 | 24 (6.5)                                     | 367                   |
| High BP   | Diabetes           | 0.0004          | 15 (17.0)                                 | 88                 | 22 (6.0)                                     | 367                   |
| High BP   | High BP Rx         | 0.0002          | 14 (15.9)                                 | 88                 | 17 (4.6)                                     | 367                   |

**Supplementary Table 10. Numbers of subjects in each age cohort identified by technology-enabled screenings.**

|                         | Adolescent (18-19) |      |       | Young adult (20-39) |      |       | Middle age (40-64) |      |       | Old age (65-90) |      |       |
|-------------------------|--------------------|------|-------|---------------------|------|-------|--------------------|------|-------|-----------------|------|-------|
|                         | Female             | Male | Total | Female              | Male | Total | Female             | Male | Total | Female          | Male | Total |
| Blood oxygen saturation | 0                  | 2    | 2     | 2                   | 2    | 4     | 3                  | 5    | 8     | 0               | 5    | 5     |
| Single-lead ECG         | 0                  | 1    | 1     | 0                   | 0    | 0     | 0                  | 0    | 0     | 0               | 0    | 0     |
| Oral                    | 17                 | 5    | 22    | 22                  | 30   | 52    | 55                 | 65   | 120   | 15              | 51   | 66    |
| Retinal                 | 2                  | 1    | 3     | 2                   | 7    | 9     | 9                  | 8    | 17    | 4               | 9    | 13    |
| Tympanic membrane       | 0                  | 0    | 0     | 1                   | 2    | 3     | 4                  | 0    | 4     | 0               | 2    | 2     |
| Hand tremor test        | 0                  | 0    | 0     | 0                   | 0    | 0     | 0                  | 0    | 0     | 0               | 0    | 0     |
| Finger-nose test        | 0                  | 0    | 0     | 0                   | 0    | 0     | 0                  | 2    | 2     | 0               | 1    | 1     |
| Finger-count test       | 0                  | 0    | 0     | 0                   | 0    | 0     | 0                  | 0    | 0     | 0               | 0    | 0     |
| Gait test               | 0                  | 0    | 0     | 0                   | 1    | 1     | 0                  | 1    | 1     | 1               | 2    | 3     |

Age ranges in years for each age cohort are in parentheses.

**Supplementary Table 11. Distribution of unhealthy subjects by clinical condition identified in each technology-enabled screening test.**

| Test              | Condition             | No. with condition (percent) | No. screened by test |
|-------------------|-----------------------|------------------------------|----------------------|
| Oral              | Carious               | 156 (38.0)                   | 411                  |
| Oral              | Missing tooth         | 115 (28.0)                   | 411                  |
| Oral              | Edentulous            | 35 (8.5)                     | 411                  |
| Oral              | Periodontal disease   | 61 (14.8)                    | 411                  |
| Retinal           | Width of rim 0.01-0.1 | 9 (2.2)                      | 404                  |
| Tympanic membrane | Perforated eardrum    | 25 (7.7)                     | 324                  |
| Tympanic membrane | Effusion              | 20 (6.2)                     | 324                  |
| Finger-nose       | Abnormal              | 3 (1.0)                      | 305                  |
| Gait              | Abnormal              | 5 (2.3)                      | 214                  |

**Supplementary Table 12. Number of subjects identified with clinical conditions in two technology-enabled screening tests.**

|                   | Tympanic membrane | Retinal | Oral | Finger-nose | Gait |
|-------------------|-------------------|---------|------|-------------|------|
| Low blood oxygen  | 1                 | 1       | 13   | 0           | 1    |
| Tympanic membrane |                   | 0       | 26   | 2           | 2    |
| Retinal           |                   |         | 8    | 0           | 0    |
| Oral              |                   |         |      | 2           | 4    |
| Finger-nose       |                   |         |      |             | 0    |

**Supplementary Table 13. Percentages of subjects identified with a clinical condition by a technology-enabled screening test and a routine health screening abnormality.**

| Abnormality       | High BMI | Low BMI | High BP | Low BP |
|-------------------|----------|---------|---------|--------|
| Low blood oxygen  | 21.1     | 42.1*   | 10.5    | 5.3    |
| Tympanic Membrane | 31.0     | 31.0    | 31.7    | 0.0    |
| Retinal           | 44.4     | 11.1    | 11.1    | 0.0    |
| Oral              | 40.4     | 17.3    | 20.6    | 0.8    |
| Finger-nose       | 0.0      | 33.3    | 0.0     | 0.0    |
| Gait              | 20.0     | 40.0    | 20.0    | 0.0    |

\*  $p < 0.05$ , subjects are more likely to have the routine health screening abnormality if they have the technology-enabled screening condition.

**Supplementary Table 14. Statistically significant correlations between conditions identified by a technology-enabled screening test and self-reported medical history.**

| Abnormality       | Medical History    | <i>p</i> -value | Subjects with condition        |                    | Subjects without condition     |                       |
|-------------------|--------------------|-----------------|--------------------------------|--------------------|--------------------------------|-----------------------|
|                   |                    |                 | No. responded yes (percentage) | No. with condition | No. responded yes (percentage) | No. without condition |
| Low blood oxygen  | Smoking            | 0.0087          | 4 (21.1)                       | 19                 | 15 (3.4)                       | 436                   |
| Tympanic Membrane | Hearing difficulty | 0.0053          | 17 (40.5)                      | 42                 | 65 (23.0)                      | 282                   |
| Retinal           | Hearing difficulty | 0.0500          | 4 (44.4)                       | 9                  | 65 (16.5)                      | 395                   |
| Retinal           | Difficulty walking | 0.0298          | 3 (33.3)                       | 9                  | 30 (7.6)                       | 395                   |
| Oral              | Glasses            | 0.0195          | 145 (56.9)                     | 255                | 70 (44.9)                      | 156                   |
| Oral              | Dental problems    | 0.0043          | 82 (32.2)                      | 255                | 30 (19.2)                      | 156                   |
| Oral              | Swollen joints     | 0.0002          | 85 (33.3)                      | 255                | 26 (16.7)                      | 156                   |
| Oral              | Hearing difficulty | 0.0017          | 72 (28.2)                      | 255                | 23 (14.7)                      | 156                   |
| Oral              | FH high BP         | 0.0172*         | 31 (12.2)                      | 255                | 33 (21.2)                      | 156                   |
| Oral              | Difficulty walking | 0.0089          | 36 (14.1)                      | 255                | 9 (5.8)                        | 156                   |
| Oral              | High BP            | 0.0339          | 30 (11.8)                      | 255                | 8 (5.1)                        | 156                   |
| Oral              | High BP Rx         | 0.0490          | 24 (9.4)                       | 255                | 6 (3.8)                        | 156                   |
| Oral              | Cardiac Rx         | 0.0267          | 8 (3.1)                        | 255                | 0 (0)                          | 156                   |
| Finger-nose       | Difficulty walking | 0.0009          | 3 (100)                        | 3                  | 27 (8.99)                      | 302                   |
| Finger-nose       | Swollen joints     | 0.0159          | 3 (100)                        | 3                  | 80 (26.0)                      | 302                   |
| Gait              | Teeth problems     | 0.0179          | 4 (80.0)                       | 5                  | 53 (25.4)                      | 209                   |
| Gait              | Swollen joints     | 0.0159          | 4 (80.0)                       | 5                  | 45 (21.5)                      | 209                   |

**Supplementary Table 15. Age cohort and gender of subjects identified with any routine health screening or any technology-enabled screening abnormality.**

|                                          | Adolescent (18-19) |      | Young adult (20-39) |      | Middle age (40-64) |      | Old age (65-90) |      | Total (n=111) |
|------------------------------------------|--------------------|------|---------------------|------|--------------------|------|-----------------|------|---------------|
|                                          | Female             | Male | Female              | Male | Female             | Male | Female          | Male |               |
| Routine health screening condition       | 10                 | 0    | 8                   | 19   | 11                 | 21   | 2               | 8    | 79            |
| Technology-enabled screening abnormality | 9                  | 0    | 8                   | 11   | 14                 | 18   | 2               | 8    | 70            |
| Total in age cohort                      | 19                 | 0    | 16                  | 23   | 16                 | 26   | 2               | 9    |               |





Supplementary Table 17. Detailed results of technology-enabled screenings and routine health screening of the 111 subjects who completed all tests.

|  | Questionnaire | High BMI | Low BMI | High BP | Low BP | ECG | Hypoxemia | TM | Retinal | Oral | Finger-nose | Gait |
|--|---------------|----------|---------|---------|--------|-----|-----------|----|---------|------|-------------|------|
|  |               |          | x       |         |        |     |           |    |         | x    |             |      |
|  |               |          | x       |         |        |     |           |    |         | x    |             |      |
|  |               | x        |         | x       |        |     |           | x  |         |      |             |      |
|  | x             |          |         | x       |        |     |           |    |         | x    |             |      |
|  | x             | x        |         |         |        |     |           | x  |         |      |             |      |
|  | x             | x        |         |         |        |     | x         |    |         |      |             |      |
|  |               |          | x       |         |        |     |           | x  |         | x    |             |      |
|  |               |          | x       |         |        |     |           | x  |         | x    |             |      |
|  | x             |          |         | x       |        |     |           |    |         | x    |             |      |
|  | x             | x        |         |         |        |     |           |    |         | x    |             |      |
|  | x             |          |         | x       |        |     |           |    |         | x    |             |      |
|  | x             |          |         | x       |        |     |           |    |         | x    |             |      |
|  | x             |          | x       |         |        |     |           |    |         | x    |             |      |
|  | x             |          |         | x       |        |     |           |    |         | x    |             |      |
|  | x             |          |         | x       |        |     |           |    |         | x    |             |      |
|  | x             | x        |         |         |        |     |           |    |         | x    |             |      |
|  | x             | x        |         |         |        |     |           |    |         | x    |             |      |
|  | x             |          | x       |         |        |     |           |    |         | x    |             |      |
|  | x             | x        |         |         |        |     |           |    |         | x    |             |      |
|  | x             |          |         | x       |        |     |           |    |         | x    |             |      |
|  | x             |          | x       |         |        |     |           | x  |         |      |             |      |
|  | x             | x        |         |         |        |     |           | x  |         |      |             |      |
|  | x             |          |         |         |        |     |           |    |         | x    |             |      |
|  | x             |          | x       |         |        |     |           |    |         | x    |             |      |
|  | x             |          |         | x       |        |     |           |    |         | x    |             |      |
|  | x             |          |         |         |        |     |           |    |         | x    |             |      |
|  | x             | x        |         | x       |        |     |           |    |         | x    |             |      |
|  | x             | x        |         |         |        |     |           | x  |         | x    |             |      |
|  | x             |          |         | x       |        |     |           | x  |         | x    |             |      |
|  | x             | x        |         |         |        |     |           | x  |         | x    |             |      |
|  | x             | x        |         |         |        |     |           |    | x       | x    |             |      |
|  | x             |          |         | x       |        |     |           |    |         | x    |             |      |
|  | x             |          | x       |         |        |     |           |    |         | x    |             |      |
|  | x             |          |         | x       |        |     |           |    |         | x    |             |      |
|  | x             |          | x       |         |        |     |           |    |         | x    |             |      |
|  | x             |          |         | x       |        |     |           |    |         | x    |             | x    |
|  | x             |          | x       |         |        |     | x         |    |         | x    |             | x    |
|  | x             |          | x       |         |        |     |           | x  |         | x    |             |      |
|  | x             | x        |         | x       |        |     |           | x  |         | x    |             | x    |

Each row corresponds to a different individual whose age and gender have been anonymized  
 An x indicates that the subject was marked as abnormal in that row's test.  
 TM: Tympanic membrane

STROBE Statement—Checklist of items that should be included in reports of *cohort studies*

| Page(s)             | Item No                   | Recommendation                                                                                                                                                                                    |
|---------------------|---------------------------|---------------------------------------------------------------------------------------------------------------------------------------------------------------------------------------------------|
| 1                   | <b>Title and abstract</b> | 1                                                                                                                                                                                                 |
|                     |                           | (a) Indicate the study's design with a commonly used term in the title or the abstract                                                                                                            |
| 2                   |                           | (b) Provide in the abstract an informative and balanced summary of what was done and what was found                                                                                               |
| <b>Introduction</b> |                           |                                                                                                                                                                                                   |
| 4                   | Background/rationale      | 2                                                                                                                                                                                                 |
|                     |                           | Explain the scientific background and rationale for the investigation being reported                                                                                                              |
| 4, 5                | Objectives                | 3                                                                                                                                                                                                 |
|                     |                           | State specific objectives, including any prespecified hypotheses                                                                                                                                  |
| <b>Methods</b>      |                           |                                                                                                                                                                                                   |
| 6                   | Study design              | 4                                                                                                                                                                                                 |
|                     |                           | Present key elements of study design early in the paper                                                                                                                                           |
| 6                   | Setting                   | 5                                                                                                                                                                                                 |
|                     |                           | Describe the setting, locations, and relevant dates, including periods of recruitment, exposure, follow-up, and data collection                                                                   |
| 6, S2               | Participants              | 6                                                                                                                                                                                                 |
|                     |                           | (a) Give the eligibility criteria, and the sources and methods of selection of participants. Describe methods of follow-up                                                                        |
| n/a                 |                           | (b) For matched studies, give matching criteria and number of exposed and unexposed                                                                                                               |
| 6, 7, S2, S3        | Variables                 | 7                                                                                                                                                                                                 |
|                     |                           | Clearly define all outcomes, exposures, predictors, potential confounders, and effect modifiers. Give diagnostic criteria, if applicable                                                          |
| 6, 7, S2, S3        | Data sources/measurement  | 8*                                                                                                                                                                                                |
|                     |                           | For each variable of interest, give sources of data and details of methods of assessment (measurement). Describe comparability of assessment methods if there is more than one group              |
| 6, S2, S4           | Bias                      | 9                                                                                                                                                                                                 |
|                     |                           | Describe any efforts to address potential sources of bias                                                                                                                                         |
| 6, S2               | Study size                | 10                                                                                                                                                                                                |
|                     |                           | Explain how the study size was arrived at                                                                                                                                                         |
| 6, S3, S4           | Quantitative variables    | 11                                                                                                                                                                                                |
|                     |                           | Explain how quantitative variables were handled in the analyses. If applicable, describe which groupings were chosen and why                                                                      |
| S3, S4              | Statistical methods       | 12                                                                                                                                                                                                |
|                     |                           | (a) Describe all statistical methods, including those used to control for confounding                                                                                                             |
| S3, S4              |                           | (b) Describe any methods used to examine subgroups and interactions                                                                                                                               |
| 6, 8, 11, 12        |                           | (c) Explain how missing data were addressed                                                                                                                                                       |
| n/a                 |                           | (d) If applicable, explain how loss to follow-up was addressed                                                                                                                                    |
| n/a                 |                           | (e) Describe any sensitivity analyses                                                                                                                                                             |
| <b>Results</b>      |                           |                                                                                                                                                                                                   |
| 18, S7              | Participants              | 13*                                                                                                                                                                                               |
|                     |                           | (a) Report numbers of individuals at each stage of study—eg numbers potentially eligible, examined for eligibility, confirmed eligible, included in the study, completing follow-up, and analysed |
| 6, S2               |                           | (b) Give reasons for non-participation at each stage                                                                                                                                              |

| <b>Fig 1</b>             |                  |     | (c) Consider use of a flow diagram                                                                                                                                                                           |
|--------------------------|------------------|-----|--------------------------------------------------------------------------------------------------------------------------------------------------------------------------------------------------------------|
| <b>S6, S8</b>            | Descriptive data | 14* | (a) Give characteristics of study participants (eg demographic, clinical, social) and information on exposures and potential confounders                                                                     |
| <b>18</b>                |                  |     | (b) Indicate number of participants with missing data for each variable of interest                                                                                                                          |
| <b>n/a</b>               |                  |     | (c) Summarise follow-up time (eg, average and total amount)                                                                                                                                                  |
| <b>n/a</b>               | Outcome data     | 15* | Report numbers of outcome events or summary measures over time                                                                                                                                               |
| <b>8-12, 19</b>          | Main results     | 16  | (a) Give unadjusted estimates and, if applicable, confounder-adjusted estimates and their precision (eg, 95% confidence interval). Make clear which confounders were adjusted for and why they were included |
| <b>S3</b>                |                  |     | (b) Report category boundaries when continuous variables were categorized                                                                                                                                    |
| <b>n/a</b>               |                  |     | (c) If relevant, consider translating estimates of relative risk into absolute risk for a meaningful time period                                                                                             |
| <b>8-12</b>              | Other analyses   | 17  | Report other analyses done—eg analyses of subgroups and interactions, and sensitivity analyses                                                                                                               |
| <b>Discussion</b>        |                  |     |                                                                                                                                                                                                              |
| <b>13</b>                | Key results      | 18  | Summarise key results with reference to study objectives                                                                                                                                                     |
| <b>15</b>                | Limitations      | 19  | Discuss limitations of the study, taking into account sources of potential bias or imprecision. Discuss both direction and magnitude of any potential bias                                                   |
| <b>13, 15</b>            | Interpretation   | 20  | Give a cautious overall interpretation of results considering objectives, limitations, multiplicity of analyses, results from similar studies, and other relevant evidence                                   |
| <b>15</b>                | Generalisability | 21  | Discuss the generalisability (external validity) of the study results                                                                                                                                        |
| <b>Other information</b> |                  |     |                                                                                                                                                                                                              |
| <b>16</b>                | Funding          | 22  | Give the source of funding and the role of the funders for the present study and, if applicable, for the original study on which the present article is based                                                |

\*Give information separately for exposed and unexposed groups.

**Note:** An Explanation and Elaboration article discusses each checklist item and gives methodological background and published examples of transparent reporting. The STROBE checklist is best used in conjunction with this article (freely available on the Web sites of PLoS Medicine at <http://www.plosmedicine.org/>, Annals of Internal Medicine at <http://www.annals.org/>, and Epidemiology at <http://www.epidem.com/>). Information on the STROBE Initiative is available at <http://www.strobe-statement.org>.
