# Supplementary material for: Technology-enabled examinations of cardiac rhythm, optic nerve, oral health, tympanic membrane, gait and coordination evaluated jointly with routine health screenings: an observational study at the 2015 Kumbh Mela in India
Source: PubMed Central journal article supplement — BMJ Open. 2018 Apr 20;8(4):e018774. doi: 10.1136/bmjopen-2017-018774 (PMC5914894; doi:10.1136/bmjopen-2017-018774), 2018-04-20
Supplement: bmjopen-2017-018774supp001.pdf [file bmjopen-2017-018774supp001.pdf]

**1 Supplementary Appendix**

2

3 Contents

4 Page 2: Supplementary Methods

5 Page 5: Supplementary Figures

6 Page 7: Supplementary Tables

## 7 Supplementary Methods

8  
9 **Criteria, ethical considerations and consent procedure:** Mahatma Gandhi Vidyamandir Karmaveer Bhausaheb Hiray  
10 Dental College & Hospital (MGVKBHDC) in Nashik was designated as one of the primary health provision and disaster  
11 management centers for the 2015 Sinhast Kumbh Mela (14 July-25 September). The hospital has an outpatient facility where  
12 pilgrims and local people were provided care, information and a resting area throughout the event. Indians between the ages  
13 of 18 years and 90 years of all ethnicities, races and genders were included in the study. Subjects younger than 18 years or  
14 older than 90 years were excluded from participation. 494 consenting adults were seen in the week that MGVKBHDC was  
15 soliciting volunteers. We anticipated pilgrims and out-of-state consenting adults would be the largest group to volunteer to be  
16 enrolled in this study, allowing us to examine inhabitants from all over the county, but local Indians were also allowed to  
17 participate. MGVKBHDC institutional human subjects review committee approved our consent procedure, clinical data  
18 collection and the plan for communication of testing results with the subjects (Protocol number: MGVKBHDC/15-16/571).  
19 Bilingual physicians from MGVKBHDC explained the scope of the study and consent forms (in English or Hindi) to subjects  
20 who were interested in participating. Subjects were asked to sign the consent forms and then remain in a waiting area before  
21 active participation in the study. Participants were free to leave at any point during their screenings. MGVKBHDC primary  
22 care physicians, dentists, ophthalmologists, otolaryngologists and neurologists performed the health screenings in the order  
23 outlined in **Fig 1**, communicated the results to subjects and provided appropriate referrals to patients needing additional  
24 medical care. De-identified data was transferred to the Massachusetts Institute of Technology (MIT) investigators for analysis  
25 after approval of the protocol by the MIT Committee on the Use of Humans as Experimental Subjects (MIT COUHES  
26 protocol number: 1512338971).

27  
28 **Data collection:** A unique registration number (1-494) linked to each subject was used to store and annotate data from  
29 screening kiosks.

30  
31 **Medical history and routine health screenings:** Self-reported responses of subjects to a detailed computerized  
32 questionnaire that included geographic and demographic questions, questions about past medical history and current  
33 illnesses. A bilingual physician recorded the medications and symptoms reported by the subjects as well as their reports of  
34 family medical history. An Omron 10 series wireless upper arm monitor with cuff (Model: BP786N) was used to collect  
35 systolic and diastolic blood pressure following the manufacturer's instructions (Omron Electronics, USA). Temperatures  
36 were measured using a digital thermometer. Height and body weight were measured using a digital scale and were recorded  
37 for all subjects.

### 38 **Technology-enabled screening devices:**

39  
40 **Blood oxygen saturation:** A CMS 50-DL Pulse Oximeter (Contec Medical Systems, USA) was used to measure blood  
41 oxygen saturation levels of hemoglobin based on photoplethysmographic pulses and pulse rate from subjects' right index  
42 fingertips [25].

43 **ECG:** The AliveCor Mobile ECG (AliveCor Inc, USA) is a single-channel cardiac event recorder consisting of a device and  
44 smartphone app that can record and review ECGs [17]. a 30-second rhythm strip (lead I) recording was uploaded wirelessly  
45 for interpretation via the AliveCor algorithm, and an ECG analysis that indicated heart rate and presence of possible atrial  
46 fibrillation was displayed on the mobile phone. Before each use, a physician cleaned the two electrodes with alcohol-based  
47 sanitizer and launched the app on the smartphone (Nexus5, LG, South Korea).

48 **Tympanic membrane imaging:** Inspection of the external ear canal and eardrum was performed using the iPhone5 LEDs  
49 and camera with the CellScope Oto phone adapter (CellScope Inc. USA) [20]. A disposable ear tip attached to the device  
50 canula was used for imaging each subject.

51 **Oral imaging:** A commercially available FDA-approved intraoral camera with software, SOPROCARE (SOPRO Acteon  
52 Imaging, France), that automatically segments and displays images of plaque, caries and periodontal diseases was used [18].  
53 Panning 30-second videos of the buccal surfaces of the upper first molars (16, 26), the buccal surface of the upper laterals  
54 (12, 22), the buccal surface of first lower molars (36, 46), as well as incisal, buccal and lingual surfaces of all accessible teeth  
55 were collected. The housing of the camera stick was covered in a clear disposable plastic sheath (U-line, USA) and sterile  
56 disposable camera bag. Subjects and clinicians wore UV protective eyewear during oral imaging. Images and video were  
57 collected by each of the following modes: (A) only 405nm LEDs powered, (B) only 450nm LEDs powered, (C) only white

58 LEDs powered. A HP 620 Notebook (Hewlett Packard, USA), Windows 7, (Microsoft Corporation, USA) with preloaded  
59 SOPROCARE software was used to store images and videos. A specialized scale for assigning patient scores vs.  
60 conventional DMFT (number of decayed, missing and filled teeth in an individual and in a population) or the Russell's  
61 periodontal indices was used by dentist examining the data. The camera system uses standard white light and three blue  
62 LEDs that emit non-ionizing light at 450 nm wavelengths. Inflamed gingiva can be scored due to fluorescence from  
63 porphyrins in blood. Illumination of microbial plaque with blue light induces fluorescence due to the bacteria and porphyrin  
64 content of the plaque.

65 **Optic nerve head photography:** Non-mydratic digital retinal imaging using the D-EYE (D-EYE Srl, USA) direct  
66 ophthalmoscopy adapter attached to iPhone5s camera was performed to capture video and still images of optic nerves of  
67 subjects [23].

68 **Gait and coordination analyses:** The Microsoft Kinect (Microsoft Corporation, USA) sensor has an RGB camera, depth  
69 sensor and multi-array microphone, which provide full-body 3D motion capture, facial and voice recognition capabilities  
70 [19]. A 2D, depth and skeleton motion dataset of motor skills, hand-eye coordination, depth perception, neuromuscular  
71 stability of individual subjects was captured by the following protocol: a) finger-nose test with index finger touching a ball  
72 suspended from the ceiling two feet in front and then the nose: to identify tremors, incoordination, and dysmetria [26]; b)  
73 finger-count dexterity test to count to five using thumb touching fingertips: to detect slowness, tremors, and incoordination  
74 [27]; c) holding out hands steadily with palms facing down: to detect tremors and arm drift (upward, downward and lateral)  
75 [27], d) walking a distance of 2.5 meters in a straight line, turning around and walking back: to identify subjects who have  
76 posture abnormalities, tremors, imbalance (left/right), a penguin gait, or an asymmetric gait while walking [28]. Kinect  
77 sensors placed in front of and behind subjects were used to capture the walking in straight-line actions (**Supplementary Fig**  
78 **1B**). For all other tests, one Kinect sensor was placed unobtrusively to the left or right of the subjects (**Supplementary Fig**  
79 **1A**).

80 **Data analyses:** De-identified data assigned to unique subject IDs was split into five separate pools consisting of optic nerve,  
81 tympanic membrane, ear, oral and neurological videos for all study participants. BMI, blood pressure, resting heart rate and  
82 body temperature are routinely measured without sophisticated TES by most primary care providers and have been  
83 collectively annotated as "routine health screenings" throughout this study. Other imaging and smartphone-based tests have  
84 been designated as TES methods. Routine health screenings and responses to medical questionnaires were grouped together  
85 for computational analyses. Resting heart rate and temperature have clinically well-defined normal, high and low ranges. For  
86 BMI, numbers less than 19 were labeled low, between 19 and 25 were characterized as normal, and 25 and above were  
87 considered high [30]. For blood pressure, systolic pressure below 90 mmHg or diastolic pressure below 60 mmHg was  
88 considered low, systolic pressure between 90 and 140 mmHg and diastolic pressure between 60 and 90 mmHg was labeled  
89 normal, and systolic pressure above 140 mmHg or diastolic pressure above 90 mmHg was labeled high [31]. Blood oxygen  
90 levels of 90% or less were annotated low. The outputs from the AliveCor mobile app were readily used as annotations for  
91 ECG tests because they were labeled 'Normal' or 'Possible atrial fibrillation' [25].

92 Videos captured by TES devices were categorized by patient ID and TES examination and displayed directly to  
93 expert physicians via a web-based examination portal conducted diagnostic feature annotation of de-identified images and  
94 videos. This password-protected secure interface was developed using web technologies (HTML, JavaScript, node.js) for this  
95 purpose and displayed an image or video for one patient at a time for a given examination. Annotators were able to mark  
96 specific features in the videos by drawing boxes around them that paused that specific frame, assign an overall score of 1  
97 (best) to 5 (worst) for the entire video, and to write clinical features that were present for specific frames or the entire video  
98 (**Supplementary Fig 2**). A panel of at least three physicians for each type of examination was assembled and independently  
99 of each other remotely annotated the data facilitated by the web interface. Due to the greater quantity of Microsoft Kinect  
100 videos, three physician-trained raters annotated all the videos, and then an expert physician ratified their labels. The interface  
101 for optic nerve videos used a previously described Disc Damage Likelihood Scale (DDLS) scale for glaucoma screening [29].  
102 The majority ratings for each subject were computed for all TES tests. For subjects with no majority rating, the lesser of the  
103 tied ratings was chosen to not overstate the prevalence of diagnosed illnesses. Results from each test were analyzed for cross-  
104 correlations with self-reported medical history responses, age and sex. Clinical findings for individuals who were tested at all  
105 six screening kiosks were also analyzed to generate population health profiles. Efficacy of routine health screenings vs. TES  
106 to identify at-risk or sick individuals examined during the study is discussed in the manuscript. Conditions outside the normal  
107 range identified by physicians for each TES test are as follows. Oral imaging: caries, missing teeth, periodontal disease;

108 tympanic membrane imaging: perforated eardrum, effusion; optic nerve head photography: width of optic rim 0.01-0.1;  
109 coordination analyses: abnormal finger-nose test.

110

111 **Statistical methods:** Fisher's exact test was used to determine statistically significant correlations between diagnoses using  
112 TES or routine health screenings and number, age, sex and questionnaire responses of participating subjects. The significance  
113 threshold was set at  $p < 0.05$ . To determine in **Supplementary Table 7** whether high BMI was statistically more prevalent in  
114 one particular age cohort (out of a total of four age groups), we calculated four proportions representing the number of  
115 subjects in a specific age cohort who had high BMI compared to the total number of subjects in that age cohort. Each  
116 proportion was compared pairwise using Fisher's exact test, which reported  $p$ -values of 0.0014 and 0.0052 when comparing  
117 the proportion from the middle age cohort to the proportions from the young adult and old age cohorts, respectively. In  
118 **Supplementary Table 8** to determine that there is a statistically significant correlation between a subject being measured for  
119 high BMI and responding that they wear glasses, we calculated two proportions: 1) the number of subjects who had high  
120 BMI and said they wear glasses (115) compared to the total number of subjects with high BMI (196), and 2) the number of  
121 subjects who did not have high BMI and said they wear glasses (132) compared to the number of subjects who did not have  
122 high BMI regardless of whether they wear glasses (298). Fisher's exact test reported a  $p$ -value of 0.0024 when comparing  
123 these proportions, so we conclude that the correlation between high BMI and wearing glasses is significant. Analyses were  
124 performed on groups of subjects who completed each individual test to avoid considering subjects who did not have that test  
125 performed.

126

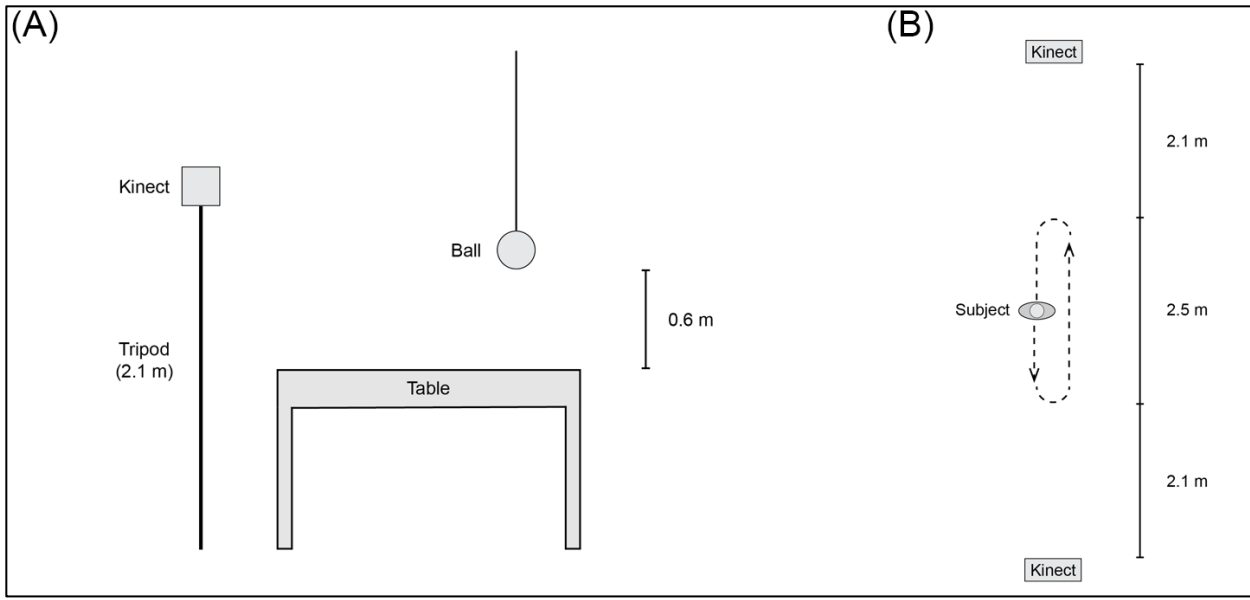

127

128  
129  
130  
131

**Supplementary Fig 1.** Diagram of Microsoft Kinect placement for gait and coordination screening tests.

(A) Finger-nose test, from the side. Both the Kinect and ball are centered over the table with the patient facing the ball and the Kinect.  
 (B) Gait test, top-down. Both Kinects are 1 m off the ground and the subject walks in a straight line between them.

**Subject ID: 1**

Please select eye health of subject using Disc Damage Likelihood scale!

- 0 Narrowest width of rim 0.3 - 0.5 (Excellent)
- 1 Narrowest width of rim 0.2 - 0.29
- 2 Narrowest width of rim 0.1 - 0.19
- 3 Narrowest width of rim 0.01 - 0.1
- 4 No rim < 45°
- 5 No rim 45° - 90°
- 6 No rim 91° - 180°
- 7 No rim > 181° (Worst)

**Table of Annotations:**

In case of issues, Please hit refresh!

Frame Normal Annotation Add / Remove ?

[Instructions](#) [Logout](#)

Previous Save! Replay Next

Normal  Abnormal  Frame no [0]

Comment  Add Annotation

**Subject ID: 35**

Please select overall health of subject from this video!

- 1 (Excellent)
- 2
- 3
- 4
- 5 (Worst)

**Table of Annotations:**

In case of issues, Please hit refresh!

Frame Normal Annotation Add / Remove ?

[Instructions](#) [Logout](#)

Previous Save! Replay Next

Normal  Abnormal  Frame no [117]

Comment  Add Annotation

**Subject ID: 5**

Please select overall health of subject from this video!

- 1 (Excellent)
- 2
- 3
- 4
- 5 (Worst)

**Table of Annotations:**

In case of issues, Please hit refresh!

Frame Normal Annotation Add / Remove ?

[Instructions](#) [Logout](#)

Previous Save! Replay Next

Normal  Abnormal  Frame no [78]

Comment  Add Annotation

**Subject ID: 237**

Please select overall health of subject from this video!

- 1. (Best) Healthy teeth and gums, with no visible signs of plaque, caries and gingivitis/bleeding.
- 2. Dental plaque visible on several teeth.
- 3. Plaque + mild inflammation of gums, maybe some early carious lesions
- 4. Plaque + calculus, early gingivitis, mild localized bleeding
- 5. Calculus + tartar, loss of several teeth, prevalent decay, profound gingivitis, bleeding, early stage periodontal disease.
- 6. (Worst) Loss of several teeth, advanced periodontal disease, profound decay etc.

**Permanent Teeth**

Upper Teeth: 1-16  
Lower Teeth: 17-32

Previous Finish User! Replay Next

Normal  Abnormal  Frame no [0]

Comment  Add Annotation

**Table of Annotations:**

In case of issues, Please hit refresh!

Frame Normal Annotation Add / Remove ?

[Instructions](#) [Logout](#)

132  
133  
134  
135

**Supplementary Fig 2.** Web interfaces for remote annotation used by physician experts for clinical evaluations. Clockwise from top left: retinal scan, tympanic membrane imaging, gait and coordination tests, oral imaging

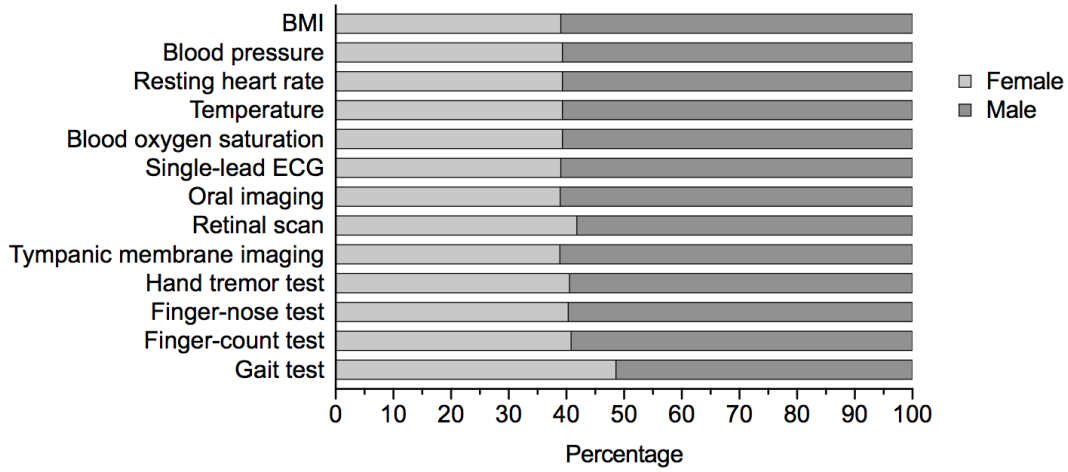

136  
137 **Supplementary Fig 3.** Percentage of test populations of each gender.  
138  
139  
140  
141

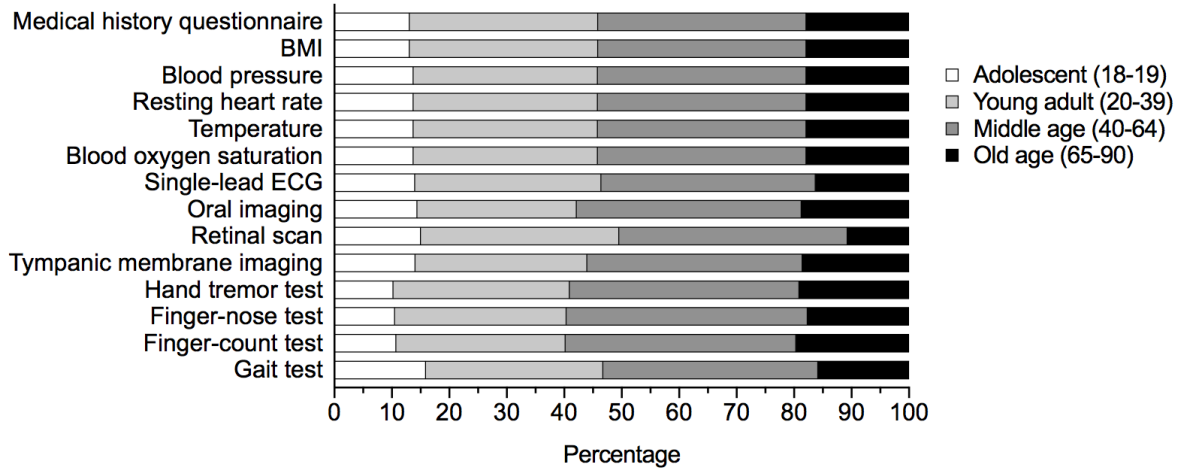

142  
143 **Supplementary Fig 4.** Percentage of test populations in each age cohort.  
144 Age ranges for each cohort are in parentheses.  
145

146  
147

**Supplementary Table 1. Test populations divided by gender and age cohorts.**

|                               | Adolescent (18-19) |      |       | Young adult (20-39) |      |       | Middle age (40-64) |      |       | Old age (65-90) |      |       |
|-------------------------------|--------------------|------|-------|---------------------|------|-------|--------------------|------|-------|-----------------|------|-------|
|                               | Female             | Male | Total | Female              | Male | Total | Female             | Male | Total | Female          | Male | Total |
| Medical history               | 39                 | 26   | 65    | 64                  | 88   | 152   | 73                 | 115  | 188   | 17              | 72   | 89    |
| Body mass index               | 39                 | 26   | 65    | 64                  | 88   | 152   | 73                 | 115  | 188   | 17              | 72   | 89    |
| Blood pressure                | 38                 | 25   | 63    | 56                  | 81   | 137   | 69                 | 104  | 173   | 16              | 66   | 82    |
| Resting heart rate            | 38                 | 25   | 63    | 56                  | 81   | 137   | 69                 | 104  | 173   | 16              | 66   | 82    |
| Temperature                   | 38                 | 25   | 63    | 56                  | 81   | 137   | 69                 | 104  | 173   | 16              | 66   | 82    |
| Blood oxygen saturation       | 38                 | 25   | 63    | 56                  | 81   | 137   | 69                 | 104  | 173   | 16              | 66   | 82    |
| Single-lead electrocardiogram | 36                 | 25   | 61    | 58                  | 81   | 139   | 60                 | 100  | 160   | 14              | 56   | 70    |
| Oral imaging                  | 37                 | 22   | 59    | 43                  | 71   | 114   | 65                 | 96   | 161   | 15              | 62   | 77    |
| Retinal scan                  | 37                 | 23   | 60    | 61                  | 79   | 140   | 63                 | 97   | 160   | 8               | 36   | 44    |
| Tympanic membrane imaging     | 30                 | 9    | 39    | 35                  | 52   | 87    | 49                 | 80   | 129   | 12              | 57   | 69    |
| Hand tremor test              | 24                 | 8    | 32    | 41                  | 55   | 96    | 50                 | 75   | 125   | 12              | 48   | 60    |
| Finger-nose test              | 24                 | 8    | 32    | 37                  | 54   | 91    | 50                 | 78   | 128   | 12              | 42   | 54    |
| Finger-count test             | 24                 | 8    | 32    | 36                  | 52   | 88    | 49                 | 71   | 120   | 13              | 46   | 59    |
| Gait test                     | 30                 | 4    | 34    | 33                  | 33   | 66    | 34                 | 46   | 80    | 7               | 27   | 34    |

148  
149  
150

Age ranges in years for each age cohort are in parentheses.

**Supplementary Table 2. Gender breakdown of self-reported medical history.**

|                                       | Female (n=193) | Male (n=301) | Total (n=494) |
|---------------------------------------|----------------|--------------|---------------|
| Glasses                               | 54.9           | 46.8         | 50.0          |
| Dental                                | 21.2           | 29.2         | 26.1          |
| Swollen joints                        | 25.4           | 25.2         | 25.3          |
| Hearing                               | 17.1           | 24.9         | 21.9          |
| Family history of diabetes            | 22.3           | 18.3         | 19.8          |
| Leg cramps                            | 19.7           | 17.9         | 18.6          |
| Family history of high blood pressure | 21.2           | 12.6         | 16.0          |
| Fatigue                               | 15.5           | 15.6         | 15.6          |
| Acidity                               | 20.2           | 11.3         | 14.8          |
| Tiredness                             | 13.0           | 15.0         | 14.2          |
| Tobacco addiction                     | 1.6            | 17.6         | 11.3          |
| Surgery                               | 9.8            | 10.0         | 9.9           |
| Difficulty walking                    | 10.4           | 9.6          | 9.9           |
| High blood pressure                   | 10.4           | 8.0          | 8.9           |
| Diabetes                              | 6.7            | 8.6          | 7.9           |
| Snore Loudly                          | 4.7            | 9.3          | 7.5           |
| High blood pressure treatment         | 7.3            | 5.6          | 6.3           |
| Environmental allergies               | 8.3            | 4.3          | 5.9           |
| Sleepiness                            | 5.2            | 5.6          | 5.5           |
| Medication allergies                  | 6.2            | 4.7          | 5.3           |
| Asthma                                | 4.7            | 5.0          | 4.9           |
| Smoking addiction                     | 0.0            | 7.6          | 4.7           |
| Family history of cardiac diseases    | 3.1            | 3.3          | 3.2           |
| Family history of asthma              | 3.1            | 3.0          | 3.0           |
| Thyroid                               | 5.7            | 1.0          | 2.8           |
| Self-medication                       | 1.0            | 4.0          | 2.8           |
| Jewelry allergies                     | 6.2            | 0.0          | 2.4           |
| Past skin infection                   | 3.1            | 2.0          | 2.4           |
| Family history of thyroid disease     | 2.1            | 2.3          | 2.2           |
| Cardiac treatment                     | 1.0            | 2.7          | 2.0           |
| Stop breathing during sleep           | 1.0            | 2.3          | 1.8           |
| Oral infection                        | 1.6            | 2.0          | 1.8           |
| Kidney disorder                       | 2.1            | 1.3          | 1.6           |
| Skin problem                          | 1.0            | 2.0          | 1.6           |
| Skin infection                        | 0.5            | 2.0          | 1.4           |
| Food allergies                        | 1.6            | 1.3          | 1.4           |
| Hyperactivity                         | 2.1            | 1.0          | 1.4           |
| Cardiovascular                        | 0.5            | 1.7          | 1.2           |
| Migraine                              | 2.1            | 0.7          | 1.2           |
| Low blood pressure                    | 2.6            | 0.3          | 1.2           |
| Family history of stroke              | 2.1            | 0.3          | 1.0           |
| Past ear infection                    | 0.5            | 1.0          | 0.8           |
| Family history of eye disease         | 0.5            | 1.0          | 0.8           |
| Heart attack                          | 0.0            | 1.3          | 0.8           |
| Material allergies                    | 1.0            | 0.7          | 0.8           |
| Anxiety                               | 0.5            | 1.0          | 0.8           |
| Injury in past 6 months               | 0.5            | 1.0          | 0.8           |
| Family history of depression          | 1.0            | 0.3          | 0.6           |
| Coronary bypass surgery               | 0.0            | 1.0          | 0.6           |
| Attention deficit disorder            | 1.0            | 0.3          | 0.6           |
| Drinking addiction                    | 0.0            | 1.0          | 0.6           |
| Eye treatment                         | 0.5            | 0.3          | 0.4           |
| Family history of skin disease        | 0.5            | 0.3          | 0.4           |
| Memory loss                           | 1.0            | 0.0          | 0.4           |
| Ear treatment                         | 0.5            | 0.3          | 0.4           |
| Lung diseases                         | 0.5            | 0.3          | 0.4           |
| Family history of ear disease         | 0.0            | 0.7          | 0.4           |
| Cancer                                | 0.5            | 0.0          | 0.2           |
| Sexually transmitted disease          | 0.0            | 0.3          | 0.2           |
| Liver disease                         | 0.5            | 0.0          | 0.2           |
| Skin treatment                        | 0.5            | 0.0          | 0.2           |
| Past gastric infection                | 0.0            | 0.3          | 0.2           |
| Depression                            | 0.0            | 0.0          | 0.0           |
| Sleep disorder treatment              | 0.0            | 0.0          | 0.0           |
| Heart murmur                          | 0.0            | 0.0          | 0.0           |
| Past lung infection                   | 0.0            | 0.0          | 0.0           |

Percentage of total population by gender who answered yes to each medical history question.



**Supplementary Table 3. Age cohort breakdown of self-reported medical history.**

|                                       | Adolescent (18-19) | Young adult (20-39) | Middle age (40-64) | Old age (65-90) |
|---------------------------------------|--------------------|---------------------|--------------------|-----------------|
| Glasses                               | 11                 | 21                  | 47                 | 21              |
| Dental                                | 3                  | 22                  | 53                 | 22              |
| Swollen joints                        | 0                  | 10                  | 51                 | 38              |
| Hearing                               | 1                  | 7                   | 50                 | 42              |
| Family history of diabetes            | 17                 | 44                  | 34                 | 5               |
| Leg cramps                            | 0                  | 15                  | 47                 | 38              |
| Family history of high blood pressure | 18                 | 46                  | 33                 | 4               |
| Fatigue                               | 1                  | 21                  | 55                 | 23              |
| Acidity                               | 5                  | 30                  | 47                 | 18              |
| Tiredness                             | 3                  | 21                  | 53                 | 23              |
| Tobacco addiction                     | 0                  | 18                  | 46                 | 36              |
| Surgery                               | 8                  | 18                  | 37                 | 37              |
| Difficulty walking                    | 0                  | 2                   | 49                 | 49              |
| High blood pressure                   | 0                  | 9                   | 57                 | 34              |
| Diabetes                              | 0                  | 15                  | 64                 | 21              |
| Snore Loudly                          | 0                  | 27                  | 65                 | 8               |
| High blood pressure treatment         | 0                  | 6                   | 55                 | 39              |
| Environmental allergies               | 17                 | 41                  | 34                 | 7               |
| Sleepiness                            | 4                  | 7                   | 63                 | 26              |
| Medication allergies                  | 15                 | 15                  | 54                 | 15              |
| Asthma                                | 0                  | 4                   | 67                 | 29              |
| Smoking addiction                     | 0                  | 9                   | 52                 | 39              |
| Family history of cardiac diseases    | 6                  | 38                  | 38                 | 19              |
| Family history of asthma              | 13                 | 13                  | 67                 | 7               |
| Thyroid                               | 0                  | 14                  | 64                 | 21              |
| Self-medication                       | 0                  | 29                  | 50                 | 21              |
| Jewelry allergies                     | 0                  | 33                  | 67                 | 0               |
| Past skin infection                   | 8                  | 25                  | 50                 | 17              |
| Family history of thyroid disease     | 18                 | 55                  | 9                  | 18              |
| Cardiac treatment                     | 0                  | 20                  | 40                 | 40              |
| Stop breathing during sleep           | 0                  | 33                  | 33                 | 33              |
| Oral infection                        | 0                  | 11                  | 67                 | 22              |
| Kidney disorder                       | 13                 | 13                  | 50                 | 25              |
| Skin problem                          | 0                  | 0                   | 50                 | 50              |
| Skin infection                        | 0                  | 29                  | 57                 | 14              |
| Food allergies                        | 0                  | 29                  | 57                 | 14              |
| Hyperactivity                         | 14                 | 29                  | 57                 | 0               |
| Cardiovascular                        | 0                  | 33                  | 67                 | 0               |
| Migraine                              | 17                 | 83                  | 0                  | 0               |
| Low blood pressure                    | 17                 | 17                  | 67                 | 0               |
| Family history of stroke              | 20                 | 60                  | 20                 | 0               |
| Past ear infection                    | 0                  | 75                  | 0                  | 25              |
| Family history of eye disease         | 0                  | 75                  | 25                 | 0               |
| Heart attack                          | 0                  | 25                  | 25                 | 50              |
| Material allergies                    | 0                  | 75                  | 25                 | 0               |
| Anxiety                               | 0                  | 50                  | 50                 | 0               |
| Injury in past 6 months               | 25                 | 0                   | 75                 | 0               |
| Family history of depression          | 33                 | 67                  | 0                  | 0               |
| Coronary bypass surgery               | 0                  | 0                   | 33                 | 67              |
| Attention deficit disorder            | 0                  | 0                   | 100                | 0               |
| Drinking addiction                    | 0                  | 0                   | 67                 | 33              |
| Eye treatment                         | 0                  | 0                   | 0                  | 100             |
| Family history of skin disease        | 0                  | 50                  | 50                 | 0               |
| Memory loss                           | 0                  | 0                   | 50                 | 50              |
| Ear treatment                         | 0                  | 0                   | 100                | 0               |
| Lung diseases                         | 0                  | 0                   | 50                 | 50              |
| Family history of ear disease         | 0                  | 50                  | 0                  | 50              |
| Cancer                                | 0                  | 0                   | 100                | 0               |
| Sexually transmitted disease          | 0                  | 100                 | 0                  | 0               |
| Liver disease                         | 0                  | 0                   | 100                | 0               |
| Skin treatment                        | 0                  | 100                 | 0                  | 0               |
| Past gastric infection                | 0                  | 0                   | 100                | 0               |
| Depression                            | 0                  | 0                   | 0                  | 0               |
| Sleep disorder treatment              | 0                  | 0                   | 0                  | 0               |
| Heart murmur                          | 0                  | 0                   | 0                  | 0               |
| Past lung infection                   | 0                  | 0                   | 0                  | 0               |

Distribution of subjects, in percentages, who responded yes to a medical history question across age cohorts. Age ranges in years for each age cohort are in parentheses.

Supplementary Table 4. Percentage of subjects in each age cohort who responded yes to a medical history question.

|                                       | Adolescent (18-19) | Young adult (20-39) | Middle age (40-64) | Old age (65-90) |
|---------------------------------------|--------------------|---------------------|--------------------|-----------------|
| Glasses                               | 43                 | 34                  | 62                 | 57              |
| Dental                                | 6                  | 18                  | 36                 | 33              |
| Swollen joints                        | 0                  | 9                   | 34                 | 54              |
| Hearing                               | 2                  | 5                   | 29                 | 51              |
| Family history of diabetes            | 26                 | 28                  | 18                 | 6               |
| Leg cramps                            | 0                  | 9                   | 23                 | 39              |
| Family history of high blood pressure | 22                 | 24                  | 14                 | 3               |
| Fatigue                               | 2                  | 11                  | 22                 | 20              |
| Acidity                               | 6                  | 14                  | 18                 | 15              |
| Tiredness                             | 3                  | 10                  | 20                 | 18              |
| Tobacco addiction                     | 0                  | 7                   | 14                 | 22              |
| Surgery                               | 6                  | 6                   | 10                 | 20              |
| Difficulty walking                    | 0                  | 1                   | 13                 | 27              |
| High blood pressure                   | 0                  | 3                   | 13                 | 17              |
| Diabetes                              | 0                  | 4                   | 13                 | 9               |
| Snore Loudly                          | 0                  | 7                   | 13                 | 3               |
| High blood pressure treatment         | 0                  | 1                   | 9                  | 13              |
| Environmental allergies               | 8                  | 8                   | 5                  | 2               |
| Sleepiness                            | 2                  | 1                   | 9                  | 8               |
| Medication allergies                  | 6                  | 3                   | 7                  | 4               |
| Asthma                                | 0                  | 1                   | 9                  | 8               |
| Smoking addiction                     | 0                  | 1                   | 6                  | 10              |
| Family history of cardiac diseases    | 2                  | 4                   | 3                  | 3               |
| Family history of asthma              | 3                  | 1                   | 5                  | 1               |
| Thyroid                               | 0                  | 1                   | 5                  | 3               |
| Self-medication                       | 0                  | 3                   | 4                  | 3               |
| Jewelry allergies                     | 0                  | 3                   | 4                  | 0               |
| Past skin infection                   | 2                  | 2                   | 3                  | 2               |
| Family history of thyroid disease     | 3                  | 4                   | 1                  | 2               |
| Cardiac treatment                     | 0                  | 1                   | 2                  | 4               |
| Stop breathing during sleep           | 0                  | 2                   | 2                  | 3               |
| Oral infection                        | 0                  | 1                   | 3                  | 2               |
| Kidney disorder                       | 2                  | 1                   | 2                  | 2               |
| Skin problem                          | 0                  | 0                   | 2                  | 4               |
| Skin infection                        | 0                  | 1                   | 2                  | 1               |
| Food allergies                        | 0                  | 1                   | 2                  | 1               |
| Hyperactivity                         | 2                  | 1                   | 2                  | 0               |
| Cardiovascular                        | 0                  | 1                   | 2                  | 0               |
| Migraine                              | 2                  | 3                   | 0                  | 0               |
| Low blood pressure                    | 2                  | 0.7                 | 2                  | 0               |
| Family history of stroke              | 2                  | 2                   | 1                  | 0               |
| Past ear infection                    | 0                  | 2                   | 0                  | 1               |
| Family history of eye disease         | 0                  | 2                   | 0.5                | 0               |
| Heart attack                          | 0                  | 0.7                 | 0.5                | 2               |
| Material allergies                    | 0                  | 2                   | 0.5                | 0               |
| Anxiety                               | 0                  | 1                   | 1                  | 0               |
| Injury in past 6 months               | 2                  | 0                   | 2                  | 0               |
| Family history of depression          | 2                  | 1                   | 0                  | 0               |
| Coronary bypass surgery               | 0                  | 0                   | 0.5                | 2               |
| Attention deficit disorder            | 0                  | 0                   | 2                  | 0               |
| Drinking addiction                    | 0                  | 0                   | 1                  | 1               |
| Eye treatment                         | 0                  | 0                   | 0                  | 2               |
| Family history of skin disease        | 0                  | 0.7                 | 0.5                | 0               |
| Memory loss                           | 0                  | 0                   | 0.5                | 1               |
| Ear treatment                         | 0                  | 0                   | 1                  | 0               |
| Lung diseases                         | 0                  | 0                   | 0.5                | 1               |
| Family history of ear disease         | 0                  | 0.7                 | 0                  | 1               |
| Cancer                                | 0                  | 0                   | 0.5                | 0               |
| Sexually transmitted disease          | 0                  | 0.7                 | 0                  | 0               |
| Liver disease                         | 0                  | 0                   | 0.5                | 0               |
| Skin treatment                        | 0                  | 0.7                 | 0                  | 0               |
| Past gastric infection                | 0                  | 0                   | 0.5                | 0               |
| Depression                            | 0                  | 0                   | 0                  | 0               |
| Sleep disorder treatment              | 0                  | 0                   | 0                  | 0               |
| Heart murmur                          | 0                  | 0                   | 0                  | 0               |
| Past lung infection                   | 0                  | 0                   | 0                  | 0               |

Age ranges in years for each age cohort are in parentheses.

167  
168

**Supplementary Table 5. Numbers of subjects in each age cohort identified by routine health screenings.**

|          | Adolescent (18-19) |      |       | Young adult (20-39) |      |       | Middle age (40-64) |      |       | Old age (65-90) |      |       |
|----------|--------------------|------|-------|---------------------|------|-------|--------------------|------|-------|-----------------|------|-------|
|          | Female             | Male | Total | Female              | Male | Total | Female             | Male | Total | Female          | Male | Total |
| High BMI | 10                 | 11   | 21    | 15                  | 35   | 50    | 43                 | 57   | 100   | 7               | 18   | 25    |
| Low BMI  | 11                 | 6    | 17    | 19                  | 9    | 28    | 7                  | 13   | 20    | 5               | 19   | 24    |
| High BP  | 0                  | 1    | 1     | 4                   | 12   | 16    | 15                 | 30   | 45    | 7               | 19   | 26    |
| Low BP   | 1                  | 0    | 1     | 2                   | 0    | 2     | 0                  | 1    | 1     | 0               | 0    | 0     |

Age ranges in years for each age cohort are in parentheses.

169  
170  
171  
172  
173  
174  
175

**Supplementary Table 6. Percentages of subjects with each condition in our study and in each encompassing region from the National Family and Health Survey 4 (NFHS4).**

|                   | High BMI |       | Low BMI |       | High BP |       |
|-------------------|----------|-------|---------|-------|---------|-------|
|                   | Female   | Male  | Female  | Male  | Female  | Male  |
| Our study         | 38.9%    | 40.2% | 21.8%   | 15.6% | 14.5%   | 22.5% |
| NFHS4 India       | 20.7%    | 18.6% | 22.9%   | 20.2% | 8.8%    | 13.6% |
| NFHS4 Maharashtra | 23.4%    | 23.8% | 23.5%   | 19.1% | 9.1%    | 15.9% |
| NFHS4 Nashik      | 22.9%    | 23.7% | 25.8%   | 16.8% | 5.7%    | 11%   |

176  
177  
178  
179  
180  
181  
182

**Supplementary Table 7. Statistically significant prevalence of clinical conditions identified by routine health screenings across age cohorts.**

| Condition | More prevalent in | Than in     | <i>p</i> -value | More prevalent cohort           |               | Less prevalent cohort           |               |
|-----------|-------------------|-------------|-----------------|---------------------------------|---------------|---------------------------------|---------------|
|           |                   |             |                 | No. with condition (percentage) | No. in cohort | No. with condition (percentage) | No. in cohort |
| High BMI  | Middle age        | Young adult | 0.0014          | 100 (59.5)                      | 168           | 50 (32.9)                       | 152           |
| High BMI  | Middle age        | Old age     | 0.0052          | 100 (59.5)                      | 168           | 25 (28.1)                       | 89            |
| High BP   | Young adult       | Adolescent  | 0.0147          | 16 (11.9)                       | 135           | 1 (1.5)                         | 65            |
| High BP   | Middle age        | Adolescent  | <0.0001         | 45 (26.2)                       | 172           | 1 (1.5)                         | 65            |
| High BP   | Middle age        | Young adult | 0.0023          | 45 (26)                         | 172           | 16 (10.5)                       | 152           |
| High BP   | Old age           | Adolescent  | <0.0001         | 26 (31.7)                       | 82            | 1 (1.5)                         | 65            |
| High BP   | Old age           | Young adult | 0.0006          | 52 (66.7)                       | 82            | 16 (10.5)                       | 152           |

Age ranges in years for each cohort: 18-19 for adolescents, 20-39 for young adults, 40-64 for middle age, and 65-90 for old age.

183  
184  
185

186  
187

**Supplementary Table 8. Number of subjects with a routine health screening condition and responded yes to a medical history question.**

| Condition | No. with condition | Glasses | Dental | Swollen joints | Hearing | FH diabetes | FH high BP | Tobacco | Difficulty walking | High BP | Diabetes | High BP Rx | Asthma | Smoking | FH cardiac | Cardiac Rx | Cardiovascular | Low BP | FH stroke | FH eye disease | Heart attack | Coronary bypass | Drinking | Eye treatment | Memory loss | Ear treatment | FH ear disease | Cancer |
|-----------|--------------------|---------|--------|----------------|---------|-------------|------------|---------|--------------------|---------|----------|------------|--------|---------|------------|------------|----------------|--------|-----------|----------------|--------------|-----------------|----------|---------------|-------------|---------------|----------------|--------|
| High BMI  | 196                | 115*    | 48     | 52             | 38      | 48*         | 41*        | 23      | 19                 | 26*     | 18       | 17         | 9      | 3**     | 5          | 5          | 1              | 1      | 1         | 3              | 2            | 1               | 1        | 0             | 2           | 2             | 1              | 0      |
| Low BMI   | 89                 | 39      | 21     | 23             | 25      | 11          | 10         | 16*     | 12                 | 4       | 6        | 4          | 4      | 9*      | 1          | 1          | 0              | 2      | 1         | 0              | 0            | 0               | 1        | 0             | 0           | 0             | 0              | 0      |
| High BP   | 88                 | 54      | 24     | 30*            | 25      | 19          | 11         | 11      | 14*                | 17*     | 15*      | 14*        | 2      | 4       | 4          | 4          | 3              | 0      | 0         | 1              | 2            | 1               | 0        | 1             | 1           | 1             | 1              | 0      |
| Low BP    | 4                  | 3       | 1      | 1              | 1       | 2           | 1          | 0       | 1                  | 0       | 0        | 0          | 0      | 1       | 0          | 0          | 0              | 0      | 0         | 0              | 0            | 0               | 0        | 0             | 0           | 0             | 0              | 0      |

Total populations reflect the number of subjects with the particular condition in that row. Multiple subjects were associated with more than one condition or questionnaire response.

\*  $p < 0.05$ , subjects are more likely to have responded yes to the column's question and have the routine health screening abnormality.

\*\*  $p < 0.05$ , subjects are less likely to have responded yes to the column's question and have the routine health screening abnormality.

188  
189  
190  
191  
192  
193  
194  
195  
196

**Supplementary Table 9. Statistically significant correlations between routine health screening conditions and self-reported medical history.**

| Condition | Medical History    | <i>p</i> -value | Subjects with routine screening condition |                    | Subjects without routine screening condition |                       |
|-----------|--------------------|-----------------|-------------------------------------------|--------------------|----------------------------------------------|-----------------------|
|           |                    |                 | No. responded yes (percentage)            | No. with condition | No. responded yes (percentage)               | No. without condition |
| High BMI  | Glasses            | 0.0024          | 115 (58.7)                                | 196                | 132 (44.3)                                   | 298                   |
| High BMI  | FH diabetes        | 0.0384          | 48 (24.5)                                 | 196                | 50 (16.8)                                    | 298                   |
| High BMI  | FH High BP         | 0.0173          | 41 (20.9)                                 | 196                | 38 (12.8)                                    | 298                   |
| Low BMI   | Tobacco addiction  | 0.0406          | 16 (18.0)                                 | 89                 | 40 (9.9)                                     | 405                   |
| High BMI  | High BP            | 0.0091          | 26 (13.3)                                 | 196                | 18 (6.0)                                     | 298                   |
| Low BMI   | Smoking            | 0.0122          | 9 (10.1)                                  | 89                 | 14 (3.5)                                     | 405                   |
| High BMI  | Smoking            | 0.0077          | 3 (1.5)                                   | 196                | 20 (6.7)                                     | 298                   |
| High BP   | Glasses            | 0.0251          | 60 (68.2)                                 | 88                 | 179 (48.8)                                   | 367                   |
| High BP   | Swollen joints     | 0.0425          | 30 (34.1)                                 | 88                 | 89 (24.3)                                    | 367                   |
| High BP   | Difficulty walking | 0.0483          | 14 (15.9)                                 | 88                 | 33 (9.0)                                     | 367                   |
| High BP   | High BP            | 0.0006          | 17 (19.3)                                 | 88                 | 24 (6.5)                                     | 367                   |
| High BP   | Diabetes           | 0.0004          | 15 (17.0)                                 | 88                 | 22 (6.0)                                     | 367                   |
| High BP   | High BP Rx         | 0.0002          | 14 (15.9)                                 | 88                 | 17 (4.6)                                     | 367                   |

197  
198  
199

200

**Supplementary Table 10. Numbers of subjects in each age cohort identified by technology-enabled screenings.**

|                         | Adolescent (18-19) |      |       | Young adult (20-39) |      |       | Middle age (40-64) |      |       | Old age (65-90) |      |       |
|-------------------------|--------------------|------|-------|---------------------|------|-------|--------------------|------|-------|-----------------|------|-------|
|                         | Female             | Male | Total | Female              | Male | Total | Female             | Male | Total | Female          | Male | Total |
| Blood oxygen saturation | 0                  | 2    | 2     | 2                   | 2    | 4     | 3                  | 5    | 8     | 0               | 5    | 5     |
| Single-lead ECG         | 0                  | 1    | 1     | 0                   | 0    | 0     | 0                  | 0    | 0     | 0               | 0    | 0     |
| Oral                    | 17                 | 5    | 22    | 22                  | 30   | 52    | 55                 | 65   | 120   | 15              | 51   | 66    |
| Retinal                 | 2                  | 1    | 3     | 2                   | 7    | 9     | 9                  | 8    | 17    | 4               | 9    | 13    |
| Tympanic membrane       | 0                  | 0    | 0     | 1                   | 2    | 3     | 4                  | 0    | 4     | 0               | 2    | 2     |
| Hand tremor test        | 0                  | 0    | 0     | 0                   | 0    | 0     | 0                  | 0    | 0     | 0               | 0    | 0     |
| Finger-nose test        | 0                  | 0    | 0     | 0                   | 0    | 0     | 0                  | 2    | 2     | 0               | 1    | 1     |
| Finger-count test       | 0                  | 0    | 0     | 0                   | 0    | 0     | 0                  | 0    | 0     | 0               | 0    | 0     |
| Gait test               | 0                  | 0    | 0     | 0                   | 1    | 1     | 0                  | 1    | 1     | 1               | 2    | 3     |

Age ranges in years for each age cohort are in parentheses.

201

202

203

204

205

206

207

208

**Supplementary Table 11. Distribution of unhealthy subjects by clinical condition identified in each technology-enabled screening test.**

| Test              | Condition             | No. with condition (percent) | No. screened by test |
|-------------------|-----------------------|------------------------------|----------------------|
| Oral              | Carious               | 156 (38.0)                   | 411                  |
| Oral              | Missing tooth         | 115 (28.0)                   | 411                  |
| Oral              | Edentulous            | 35 (8.5)                     | 411                  |
| Oral              | Periodontal disease   | 61 (14.8)                    | 411                  |
| Retinal           | Width of rim 0.01-0.1 | 9 (2.2)                      | 404                  |
| Tympanic membrane | Perforated eardrum    | 25 (7.7)                     | 324                  |
| Tympanic membrane | Effusion              | 20 (6.2)                     | 324                  |
| Finger-nose       | Abnormal              | 3 (1.0)                      | 305                  |
| Gait              | Abnormal              | 5 (2.3)                      | 214                  |

209

210

211

212

213

214

**Supplementary Table 12. Number of subjects identified with clinical conditions in two technology-enabled screening tests.**

|                   | Tympanic membrane | Retinal | Oral | Finger-nose | Gait |
|-------------------|-------------------|---------|------|-------------|------|
| Low blood oxygen  | 1                 | 1       | 13   | 0           | 1    |
| Tympanic membrane |                   | 0       | 26   | 2           | 2    |
| Retinal           |                   |         | 8    | 0           | 0    |
| Oral              |                   |         |      | 2           | 4    |
| Finger-nose       |                   |         |      |             | 0    |

215

216

217  
218  
219

**Supplementary Table 13. Percentages of subjects identified with a clinical condition by a technology-enabled screening test and a routine health screening abnormality.**

| Abnormality       | High BMI | Low BMI | High BP | Low BP |
|-------------------|----------|---------|---------|--------|
| Low blood oxygen  | 21.1     | 42.1*   | 10.5    | 5.3    |
| Tympanic Membrane | 31.0     | 31.0    | 31.7    | 0.0    |
| Retinal           | 44.4     | 11.1    | 11.1    | 0.0    |
| Oral              | 40.4     | 17.3    | 20.6    | 0.8    |
| Finger-nose       | 0.0      | 33.3    | 0.0     | 0.0    |
| Gait              | 20.0     | 40.0    | 20.0    | 0.0    |

\*  $p < 0.05$ , subjects are more likely to have the routine health screening abnormality if they have the technology-enabled screening condition.

220  
221  
222  
223  
224  
225  
226

**Supplementary Table 14. Statistically significant correlations between conditions identified by a technology-enabled screening test and self-reported medical history.**

| Abnormality       | Medical History    | <i>p</i> -value | Subjects with condition        |                    | Subjects without condition     |                       |
|-------------------|--------------------|-----------------|--------------------------------|--------------------|--------------------------------|-----------------------|
|                   |                    |                 | No. responded yes (percentage) | No. with condition | No. responded yes (percentage) | No. without condition |
| Low blood oxygen  | Smoking            | 0.0087          | 4 (21.1)                       | 19                 | 15 (3.4)                       | 436                   |
| Tympanic Membrane | Hearing difficulty | 0.0053          | 17 (40.5)                      | 42                 | 65 (23.0)                      | 282                   |
| Retinal           | Hearing difficulty | 0.0500          | 4 (44.4)                       | 9                  | 65 (16.5)                      | 395                   |
| Retinal           | Difficulty walking | 0.0298          | 3 (33.3)                       | 9                  | 30 (7.6)                       | 395                   |
| Oral              | Glasses            | 0.0195          | 145 (56.9)                     | 255                | 70 (44.9)                      | 156                   |
| Oral              | Dental problems    | 0.0043          | 82 (32.2)                      | 255                | 30 (19.2)                      | 156                   |
| Oral              | Swollen joints     | 0.0002          | 85 (33.3)                      | 255                | 26 (16.7)                      | 156                   |
| Oral              | Hearing difficulty | 0.0017          | 72 (28.2)                      | 255                | 23 (14.7)                      | 156                   |
| Oral              | FH high BP         | 0.0172*         | 31 (12.2)                      | 255                | 33 (21.2)                      | 156                   |
| Oral              | Difficulty walking | 0.0089          | 36 (14.1)                      | 255                | 9 (5.8)                        | 156                   |
| Oral              | High BP            | 0.0339          | 30 (11.8)                      | 255                | 8 (5.1)                        | 156                   |
| Oral              | High BP Rx         | 0.0490          | 24 (9.4)                       | 255                | 6 (3.8)                        | 156                   |
| Oral              | Cardiac Rx         | 0.0267          | 8 (3.1)                        | 255                | 0 (0)                          | 156                   |
| Finger-nose       | Difficulty walking | 0.0009          | 3 (100)                        | 3                  | 27 (8.99)                      | 302                   |
| Finger-nose       | Swollen joints     | 0.0159          | 3 (100)                        | 3                  | 80 (26.0)                      | 302                   |
| Gait              | Teeth problems     | 0.0179          | 4 (80.0)                       | 5                  | 53 (25.4)                      | 209                   |
| Gait              | Swollen joints     | 0.0159          | 4 (80.0)                       | 5                  | 45 (21.5)                      | 209                   |

227  
228  
229  
230  
231  
232  
233

**Supplementary Table 15. Age cohort and gender of subjects identified with any routine health screening or any technology-enabled screening abnormality.**

|                                          | Adolescent (18-19) |      | Young adult (20-39) |      | Middle age (40-64) |      | Old age (65-90) |      | Total (n=111) |
|------------------------------------------|--------------------|------|---------------------|------|--------------------|------|-----------------|------|---------------|
|                                          | Female             | Male | Female              | Male | Female             | Male | Female          | Male |               |
| Routine health screening condition       | 10                 | 0    | 8                   | 19   | 11                 | 21   | 2               | 8    | 79            |
| Technology-enabled screening abnormality | 9                  | 0    | 8                   | 11   | 14                 | 18   | 2               | 8    | 70            |
| Total in age cohort                      | 19                 | 0    | 16                  | 23   | 16                 | 26   | 2               | 9    |               |

234

Supplementary Table 16. Detailed results of technology-enabled screenings and routine health screenings of the 111 subjects who completed all tests.

|                                                | Questionnaire | High BMI | Low BMI | High BP | Low BP | ECG | Hypoxemia | TM | Retinal | Oral | Finger-nose | Gait |
|------------------------------------------------|---------------|----------|---------|---------|--------|-----|-----------|----|---------|------|-------------|------|
| Normal routine, Normal TES                     |               |          |         |         |        |     |           |    |         |      |             |      |
|                                                |               |          |         |         |        |     |           |    |         |      |             |      |
|                                                | x             |          |         |         |        |     |           |    |         |      |             |      |
|                                                | x             |          |         |         |        |     |           |    |         |      |             |      |
| Routine health screening condition, normal TES |               | x        |         |         |        |     |           |    |         |      |             |      |
|                                                |               | x        |         |         |        |     |           |    |         |      |             |      |
|                                                |               |          | x       |         |        |     |           |    |         |      |             |      |
|                                                |               | x        |         |         |        |     |           |    |         |      |             |      |
|                                                |               | x        |         |         |        |     |           |    |         |      |             |      |
|                                                |               |          |         |         | x      |     |           |    |         |      |             |      |
|                                                |               |          | x       |         |        |     |           |    |         |      |             |      |
|                                                |               | x        |         |         |        |     |           |    |         |      |             |      |
|                                                | x             | x        |         |         |        |     |           |    |         |      |             |      |
|                                                | x             | x        |         |         |        |     |           |    |         |      |             |      |
|                                                | x             | x        |         |         |        |     |           |    |         |      |             |      |
|                                                | x             |          | x       |         |        |     |           |    |         |      |             |      |
|                                                | x             |          | x       |         |        |     |           |    |         |      |             |      |
|                                                |               | x        |         |         | x      |     |           |    |         |      |             |      |
|                                                |               | x        |         |         |        | x   |           |    |         |      |             |      |
|                                                | x             | x        |         |         |        |     |           |    |         |      |             |      |
|                                                | x             | x        |         |         |        |     |           |    |         |      |             |      |
|                                                | x             |          | x       |         |        |     |           |    |         |      |             |      |
|                                                | x             | x        |         |         | x      |     |           |    |         |      |             |      |
|                                                | x             | x        |         |         | x      |     |           |    |         |      |             |      |
| x                                              | x             |          |         | x       |        |     |           |    |         |      |             |      |
| x                                              | x             |          |         | x       |        |     |           |    |         |      |             |      |
| Normal routine health screening, Abnormal TES  |               |          |         |         |        |     |           |    |         | x    |             |      |
|                                                |               |          |         |         |        |     |           |    |         | x    |             |      |
|                                                |               |          |         |         |        |     |           | x  |         |      |             |      |
|                                                |               |          |         |         |        |     |           |    |         | x    |             |      |
|                                                |               |          |         |         |        |     |           |    |         | x    |             |      |
|                                                | x             |          |         |         |        |     |           |    |         | x    |             |      |
|                                                | x             |          |         |         |        |     |           |    | x       |      |             |      |
|                                                | x             |          |         |         |        |     |           |    |         | x    |             |      |
|                                                |               |          |         |         |        |     |           |    |         | x    |             |      |
|                                                |               |          |         |         |        |     |           |    |         | x    |             |      |
|                                                |               |          |         |         |        |     |           |    |         | x    |             |      |
|                                                |               |          |         |         |        |     |           |    |         | x    |             |      |
|                                                |               |          |         |         |        |     |           |    |         | x    |             |      |
|                                                |               |          |         |         |        |     |           |    | x       |      |             |      |
|                                                |               |          |         |         |        |     |           |    |         |      | x           |      |
|                                                |               |          |         |         |        |     |           |    |         |      |             | x    |
|                                                |               |          |         |         |        |     | x         |    | x       | x    |             |      |

Each row corresponds to a different individual whose age and gender have been anonymized  
 An x indicates that the subject was marked as abnormal in that row's test.  
 TM: Tympanic membrane.
